# Supplementary material for: Temporal Statistical Relationship between Regional Cerebral Oxygen Saturation (rSO2) and Brain Tissue Oxygen Tension (PbtO2) in Moderate-to-Severe Traumatic Brain Injury: A Canadian High Resolution-TBI (CAHR-TBI) Cohort Study
Source: MDPI journal article supplement (doi:10.3390/bioengineering10101124), 2023-09-25
Supplement: s1 [file s1]

## *Supplementary Material*

### **Temporal statistical relationship between regional cerebral oxygen saturation (rSO<sub>2</sub>) and brain tissue oxygen tension (PbtO<sub>2</sub>) in moderate to severe traumatic brain injury: A Canadian High Resolution-TBI (CAHR-TBI) Cohort Study**

<sup>1</sup> Department of Human Anatomy and Cell Science, Rady Faculty of Health Sciences, University of Manitoba, Winnipeg, Canada

<sup>2</sup> Section of Neurosurgery, Department of Surgery, Rady Faculty of Health Sciences, University of Manitoba, Winnipeg, Canada

<sup>3</sup> Department of Anesthesiology, Pharmacology & Therapeutics, University of British Columbia, Vancouver, Canada

<sup>4</sup> Biomedical Engineering, Faculty of Engineering, University of Manitoba, Winnipeg, Canada

<sup>5</sup> Department of Neurology, Karolinska University Hospital, Stockholm, Sweden

<sup>6</sup> Department of Clinical Neuroscience, Karolinska Institutet, Stockholm, Sweden

<sup>7</sup> Department of Neurosurgery, University of Helsinki and Helsinki University Hospital, Helsinki, Finland

<sup>8</sup> Department of Intensive Care, Maastricht University Medical Center, Maastricht, The Netherlands; School of Mental Health and Neurosciences, University Maastricht, Maastricht, The Netherlands

<sup>9</sup> Section of Neurosurgery, Department of Clinical Neurosciences, University of Calgary, Calgary, Canada

<sup>10</sup> Section of Critical Care, Department of Medicine, University of Montreal, Montreal, Canada

<sup>11</sup> Department of Critical Care Medicine, University of Calgary, Calgary, Canada

<sup>12</sup> Centre on Aging, University of Manitoba, Winnipeg, Canada

<sup>13</sup> Division of Anaesthesia, Department of Medicine, Addenbrooke's Hospital, University of Cambridge, Cambridge, UK

<sup>14</sup> Department of Clinical Neurosciences, University of Calgary, Calgary, Canada

<sup>15</sup> Hotchkiss Brain Institute, University of Calgary, Calgary, Canada

#### **\* Correspondence:**

Alwyn Gomez BSc MD

Department of Surgery, Rady Faculty of Health Sciences

University of Manitoba

Winnipeg, MB, Canada

Email: gomez35@myumanitoba.ca

Twitter: @alwyngomez

# 1 Supplementary File S1: Evaluation of Stationarity of PbtO<sub>2</sub> Signals

Supplementary File S1 Table 1: KPSS and ADF test results for each subject

| Subject ID | PbtO <sub>2</sub> |       | $\Delta$ PbtO <sub>2</sub> |       |
|------------|-------------------|-------|----------------------------|-------|
|            | KPSS              | ADF   | KPSS                       | ADF   |
| 1          |                   |       |                            |       |
| 2          | <0.01             | 0.46  | 0.08                       | <0.01 |
| 3          | <0.01             | <0.01 | >0.1                       | <0.01 |
| 4          | <0.01             | 0.19  | >0.1                       | <0.01 |
| 5          | <0.01             | <0.01 | >0.1                       | <0.01 |
| 6          | <0.01             | <0.01 | >0.1                       | <0.01 |
| 7          | <0.01             | <0.01 | >0.1                       | <0.01 |
| 8          | <0.01             | 0.02  | >0.1                       | <0.01 |
| 9          | <0.01             | <0.01 | >0.1                       | <0.01 |
| 10         | <0.01             | <0.01 | >0.1                       | <0.01 |
| 11         | <0.01             | <0.01 | >0.1                       | <0.01 |
| 12         | <0.01             | 0.01  | >0.1                       | <0.01 |
| 13         | <0.01             | <0.01 | >0.1                       | <0.01 |
| 14         | <0.01             | <0.01 | >0.1                       | <0.01 |
| 15         | <0.01             | <0.01 | >0.1                       | <0.01 |
| 16         | <0.01             | <0.01 | >0.1                       | <0.01 |
| 17         | <0.01             | <0.01 | >0.1                       | <0.01 |
| 18         | <0.01             | <0.01 | >0.1                       | <0.01 |
| 19         | <0.01             | 0.07  | >0.1                       | <0.01 |
| 20         | <0.01             | <0.01 | >0.1                       | <0.01 |

*ADF = Augmented Dickie Fuller test, KPSS = Kwiatkowski-Phillips-Schmidt-Shin test,  $\Delta$ PbtO<sub>2</sub> = change in brain tissue oxygen tension, PbtO<sub>2</sub> = Brain tissue oxygen tension.*

**Supplementary File S1 Figures 1-20:**

**Plot Legend:** *For the following plots the dashed blue line represents the significance levels which were set to a correlation level of  $\pm(2/N^{1/2})$ , where  $N$  is the number of samples. ACF = Autocorrelative function,  $\Delta PbtO_2$  = change in brain tissue oxygen tension,  $PbtO_2$  = Brain tissue oxygen tension*

**Subject 1**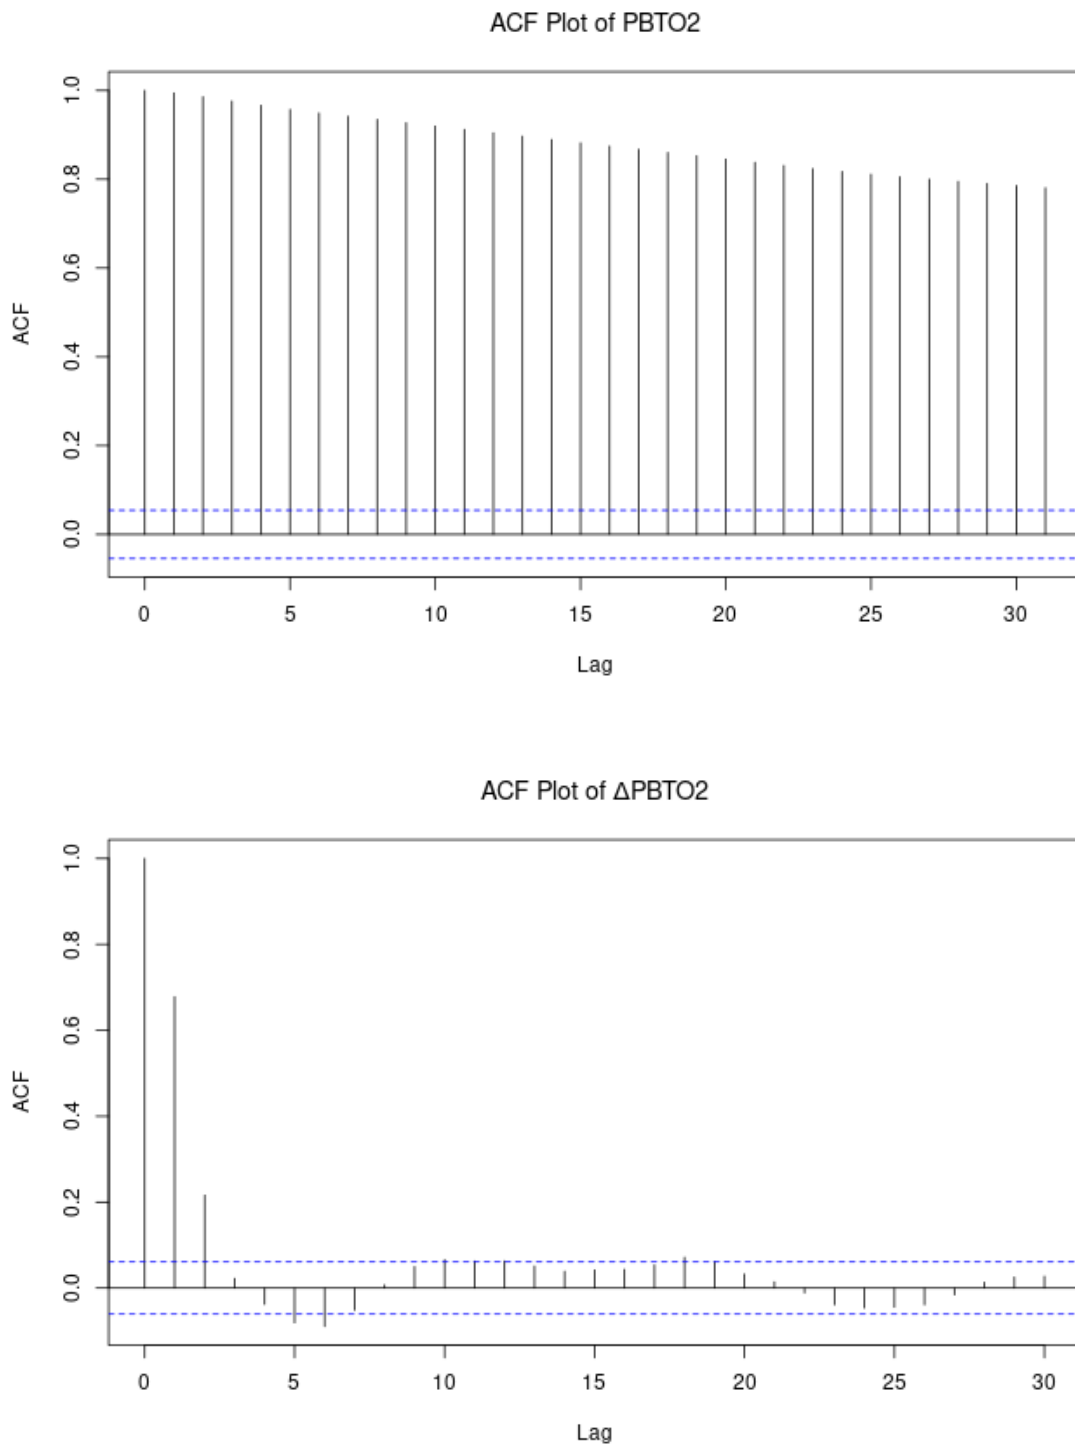**Supplementary File S1 Figure 1: ACF Plots of PbtO<sub>2</sub> (Top) and  $\Delta$ PbtO<sub>2</sub> (Bottom) for Subject 1.**

## Subject 2

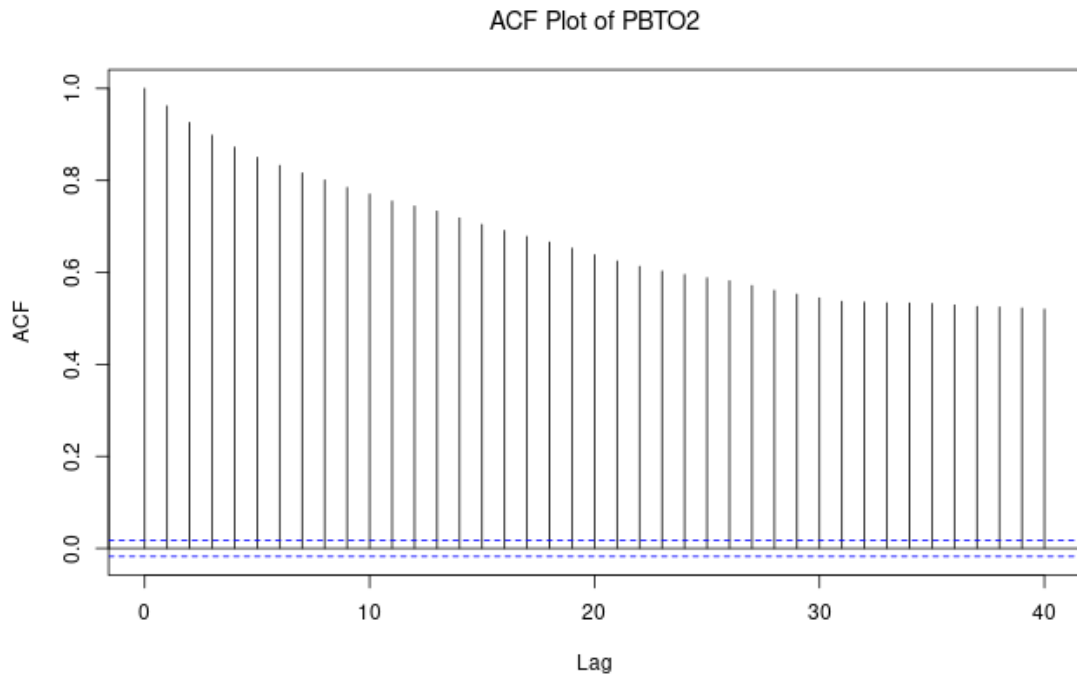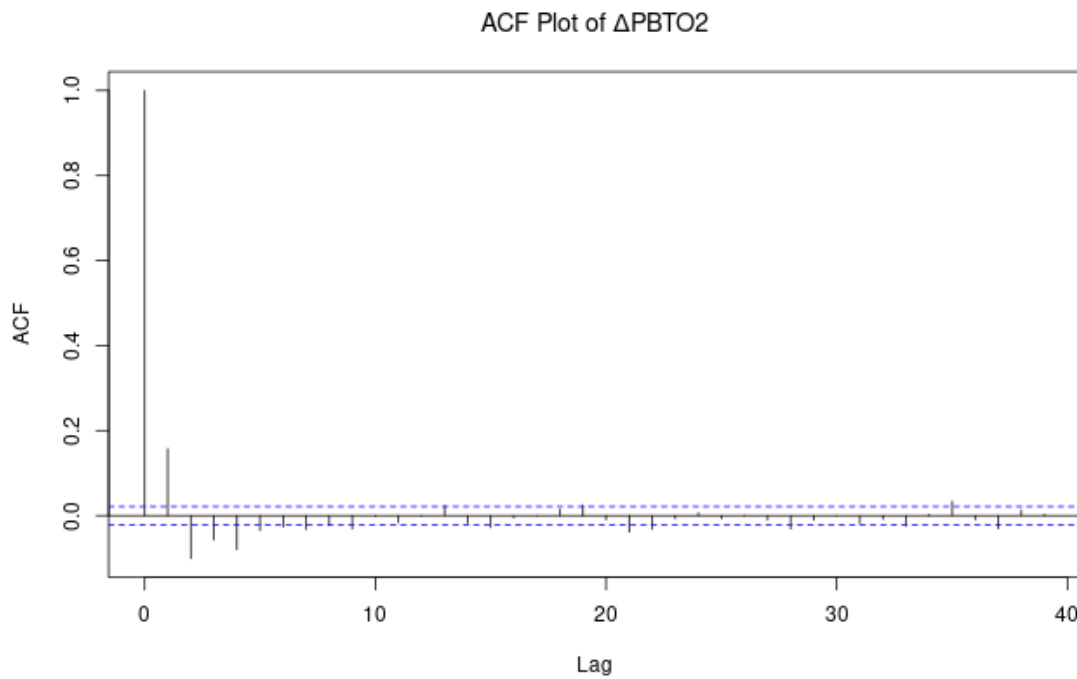

**Supplementary File S1 Figure 2: ACF Plots of PbtO<sub>2</sub> (Top) and  $\Delta$ PbtO<sub>2</sub> (Bottom) for Subject 2**

**Subject 3**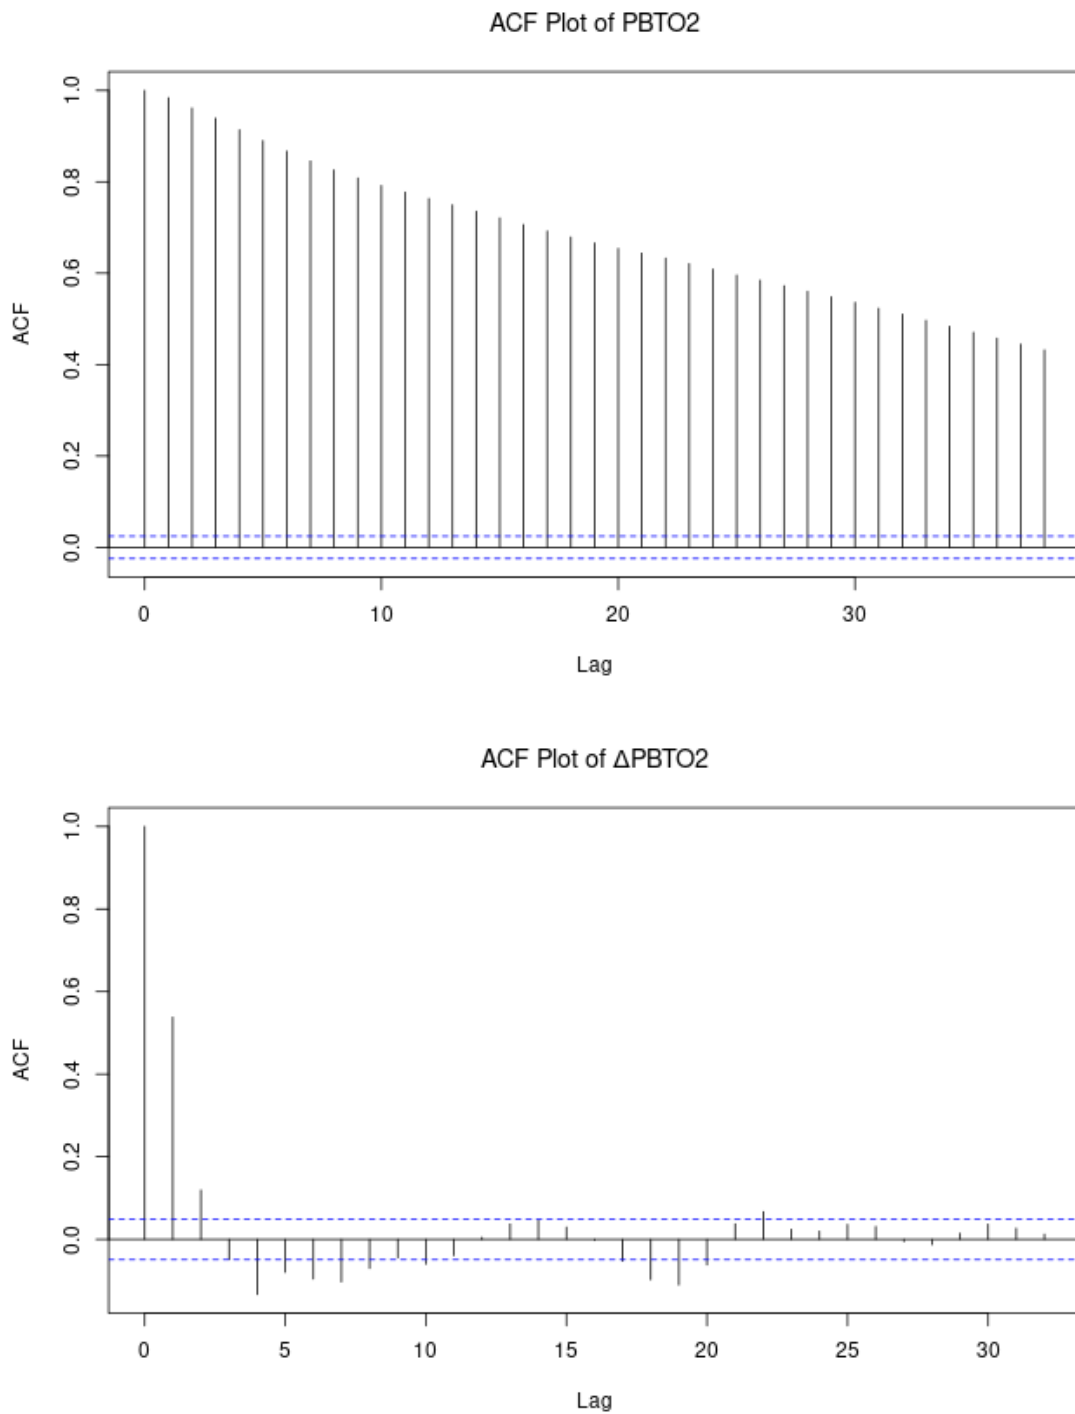**Supplementary File S1 Figure 3: ACF Plots of PbtO<sub>2</sub> (Top) and  $\Delta$ PbtO<sub>2</sub> (Bottom) for Subject 3**

## Subject 4

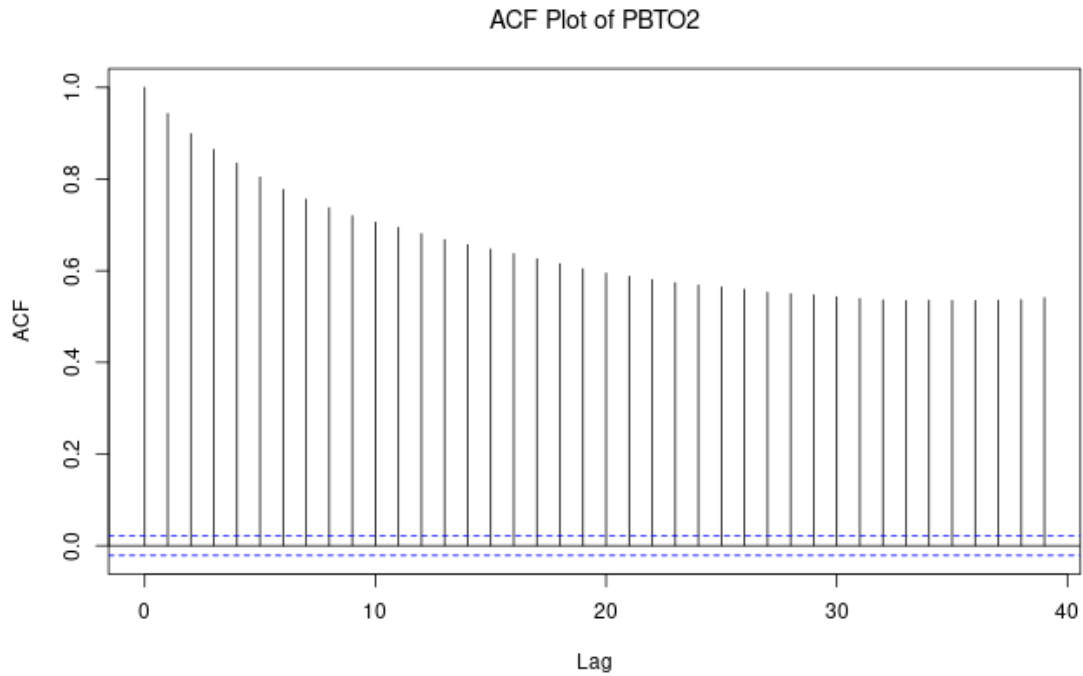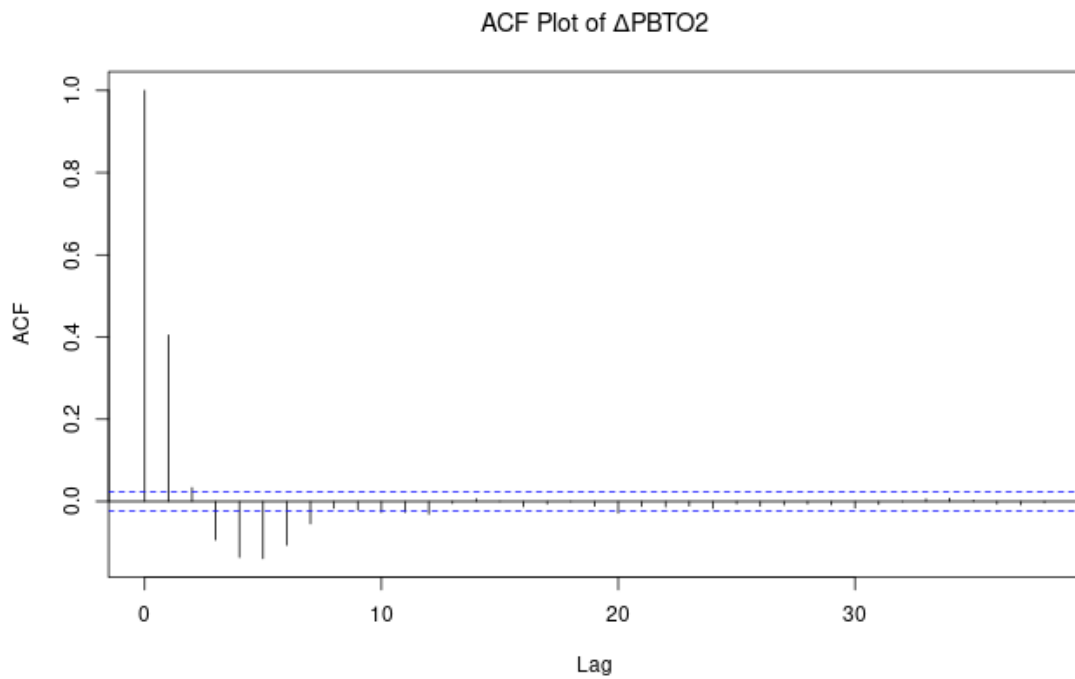

Supplementary File S1 Figure 4: ACF Plots of PbtO<sub>2</sub> (Top) and  $\Delta$ PbtO<sub>2</sub> (Bottom) for Subject 4

**Subject 5**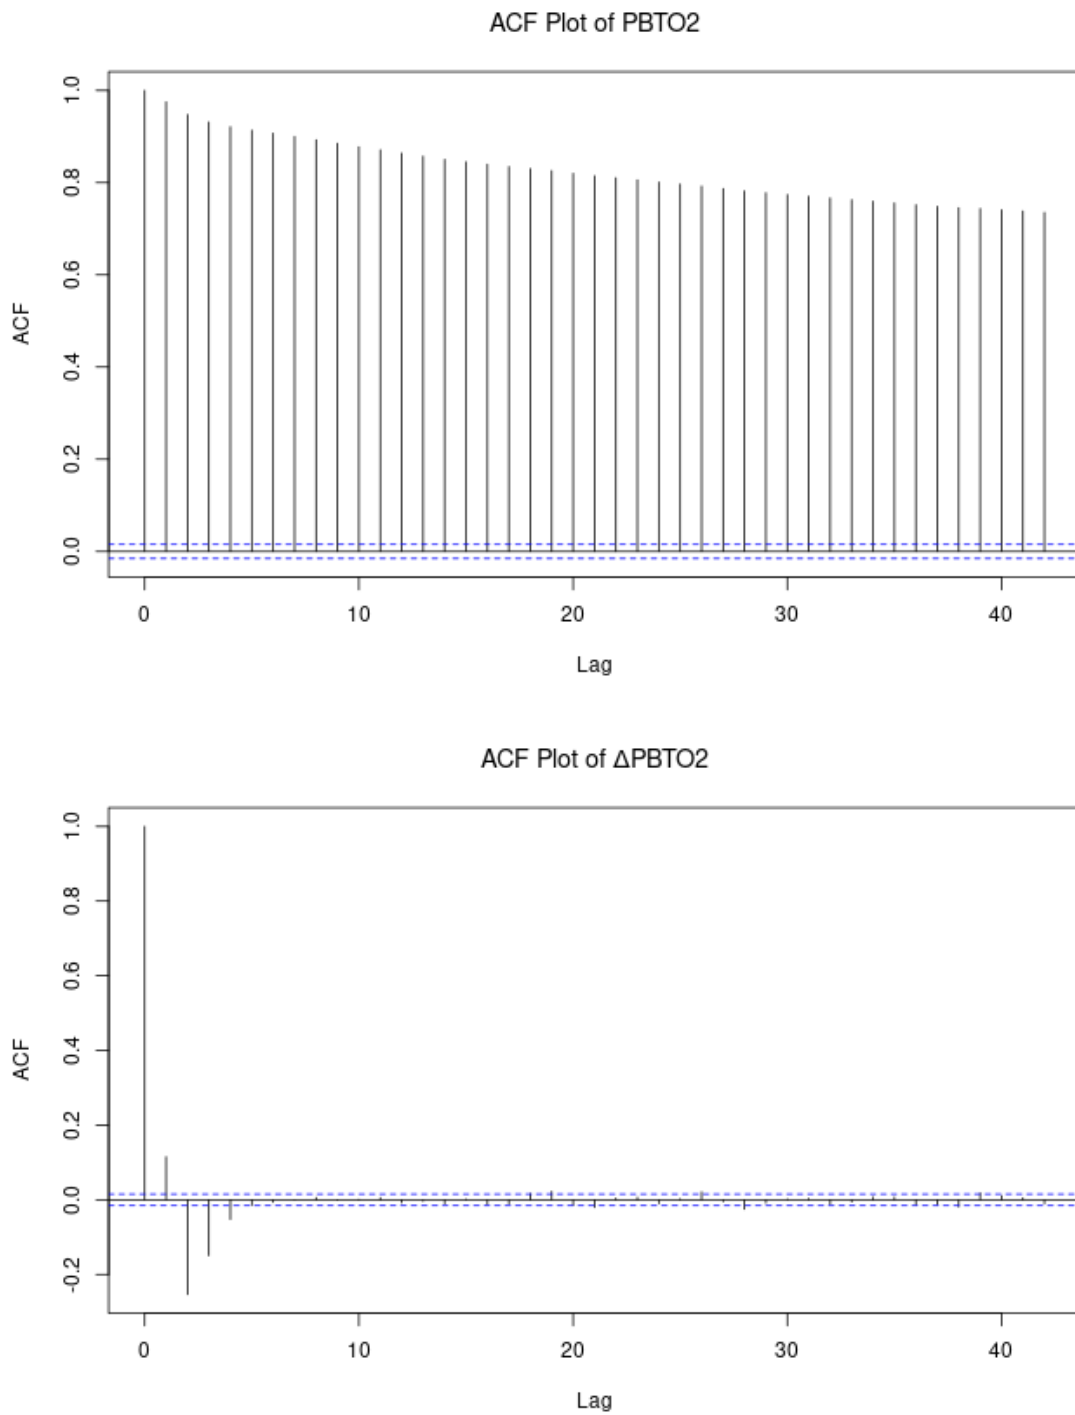**Supplementary File S1 Figure 5: ACF Plots of PbtO<sub>2</sub> (Top) and  $\Delta$ PbtO<sub>2</sub> (Bottom) for Subject 5**



## Subject 6

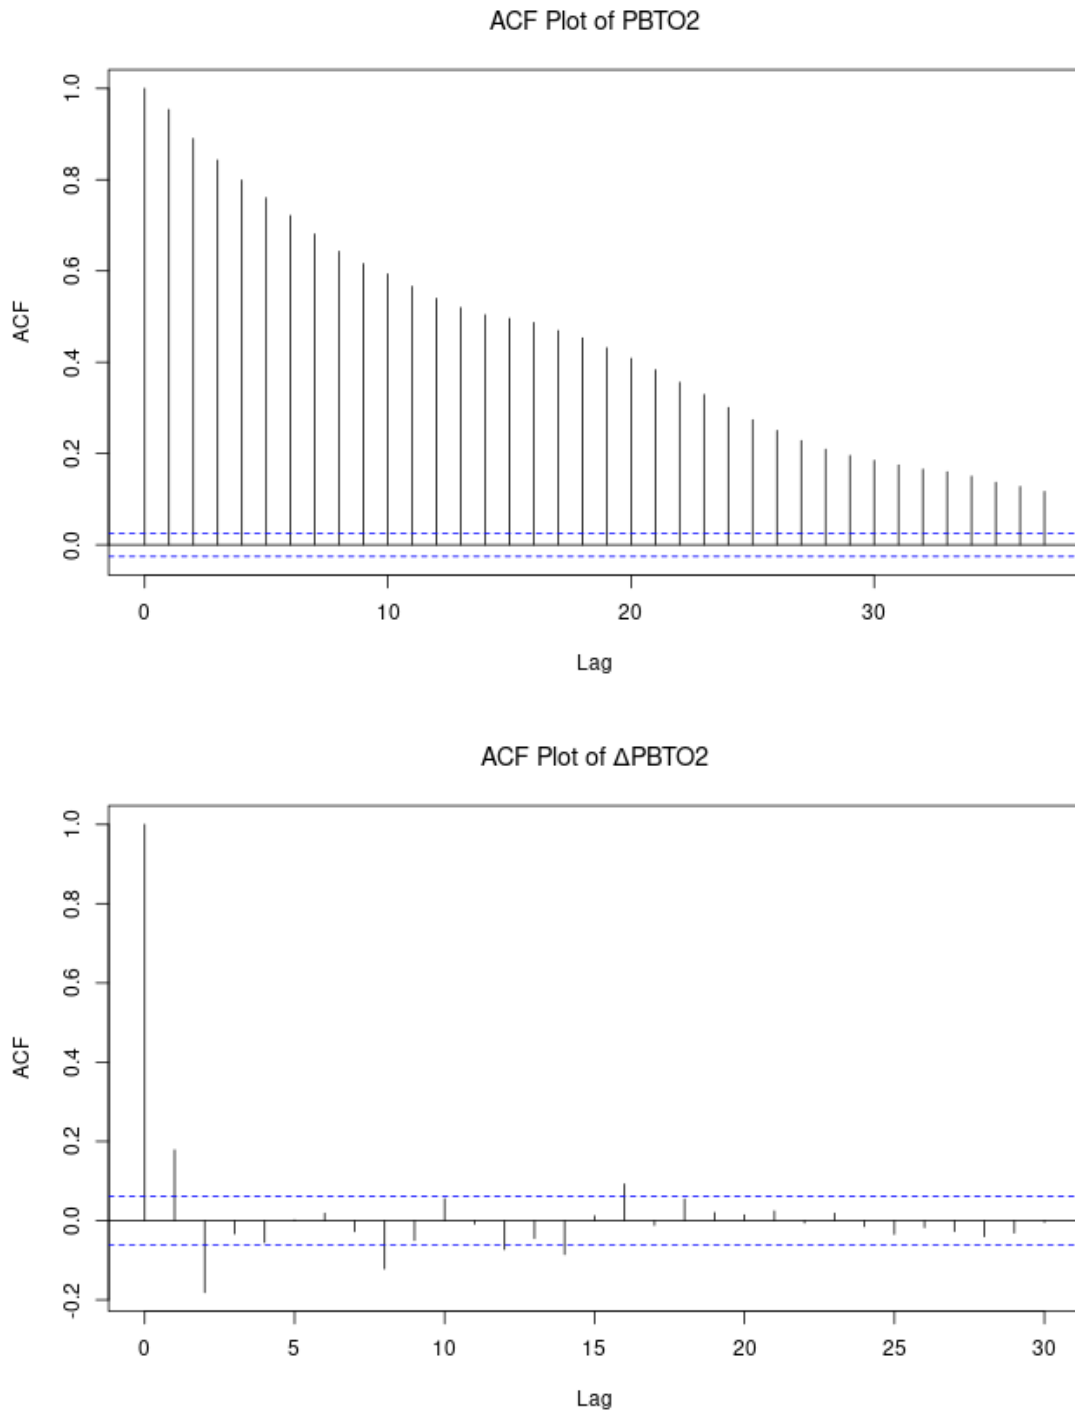

Supplementary File S1 Figure 6: ACF Plots of PbtO<sub>2</sub> (Top) and  $\Delta$ PbtO<sub>2</sub> (Bottom) for Subject 6

**Subject 7**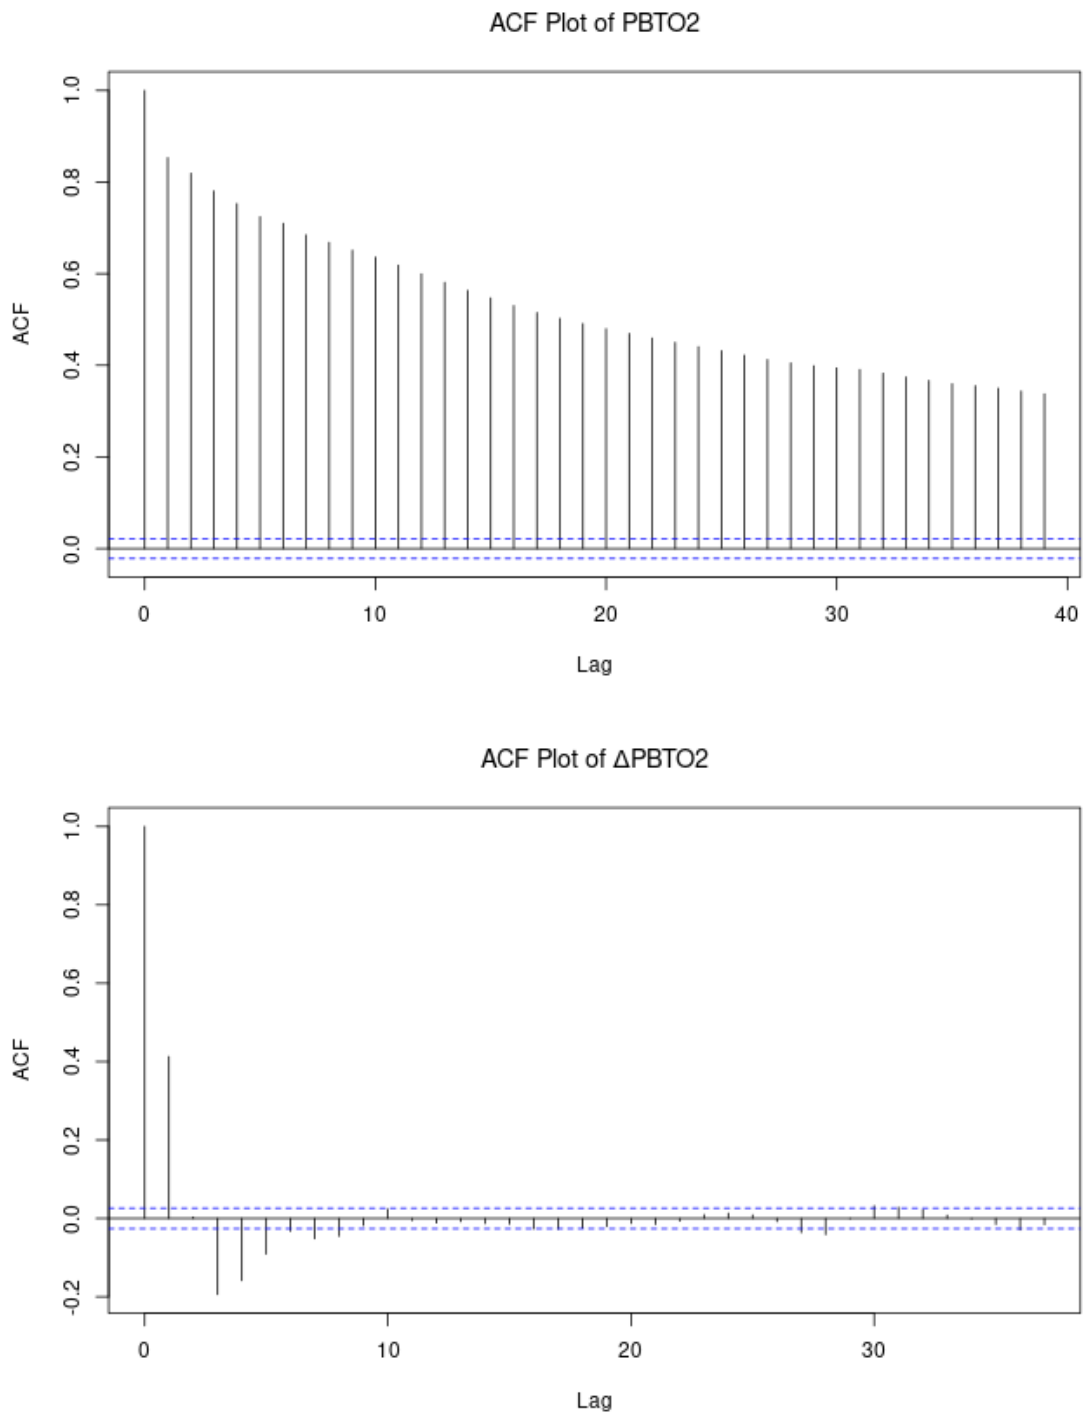**Supplementary File S1 Figure 7: ACF Plots of PbtO<sub>2</sub> (Top) and  $\Delta$ PbtO<sub>2</sub> (Bottom) for Subject 7**

## Subject 8

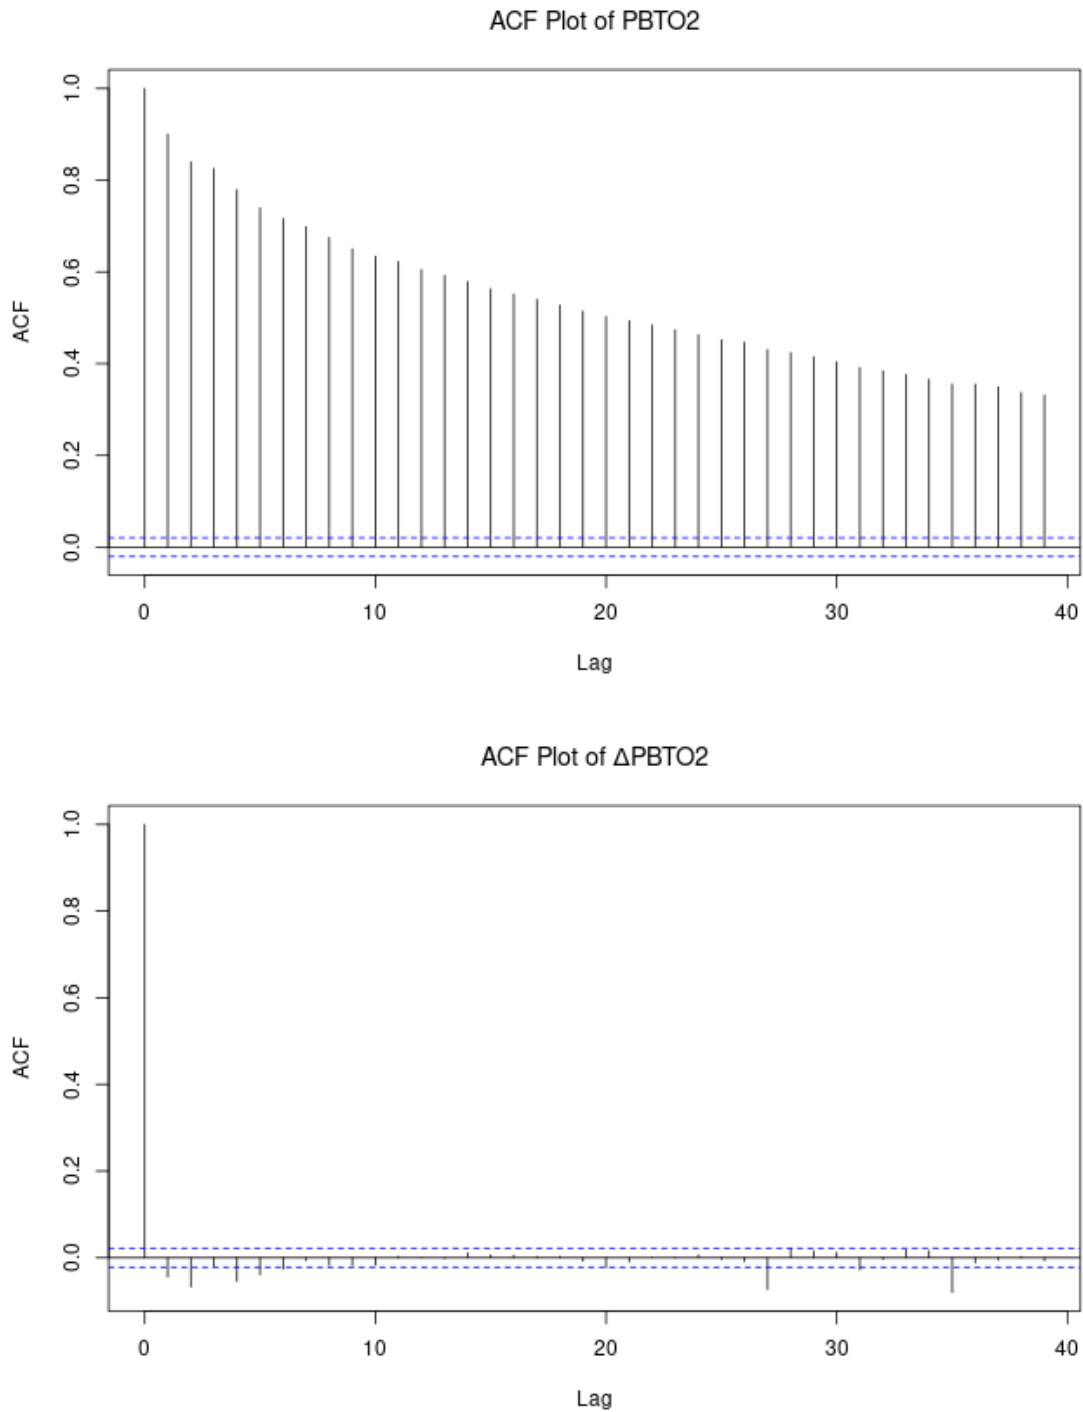

Supplementary File S1 Figure 8: ACF Plots of PbtO<sub>2</sub> (Top) and  $\Delta$ PbtO<sub>2</sub> (Bottom) for Subject 8

**Subject 9**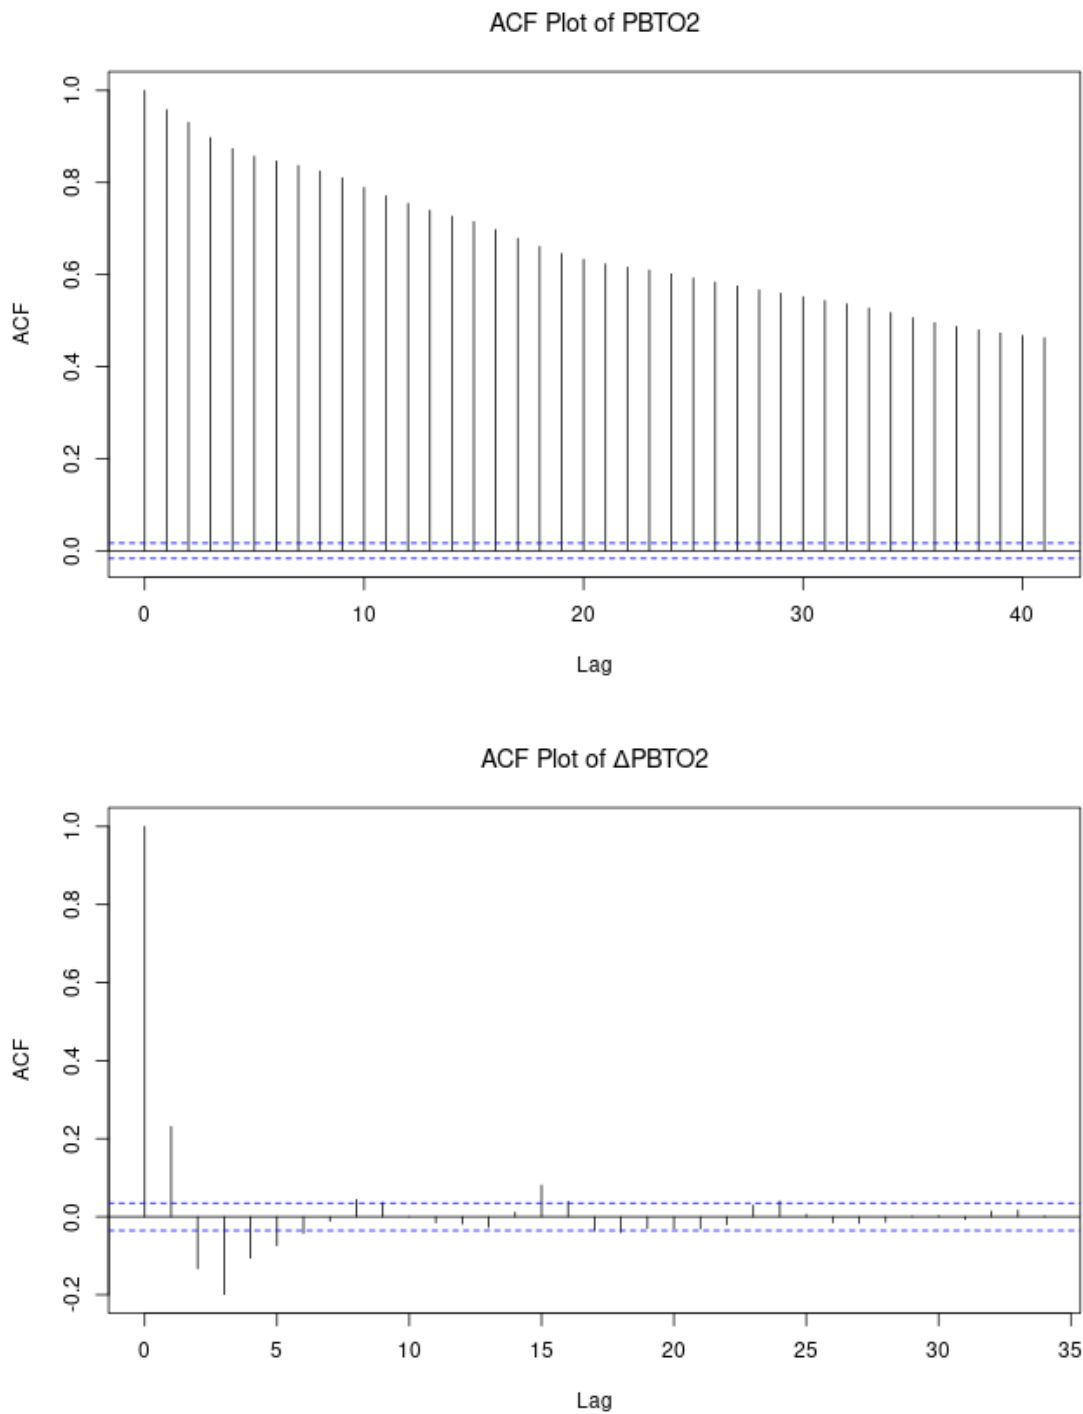**Supplementary File S1 Figure 9: ACF Plots of PbtO<sub>2</sub> (Top) and  $\Delta$ PbtO<sub>2</sub> (Bottom) for Subject 9**

## Subject 10

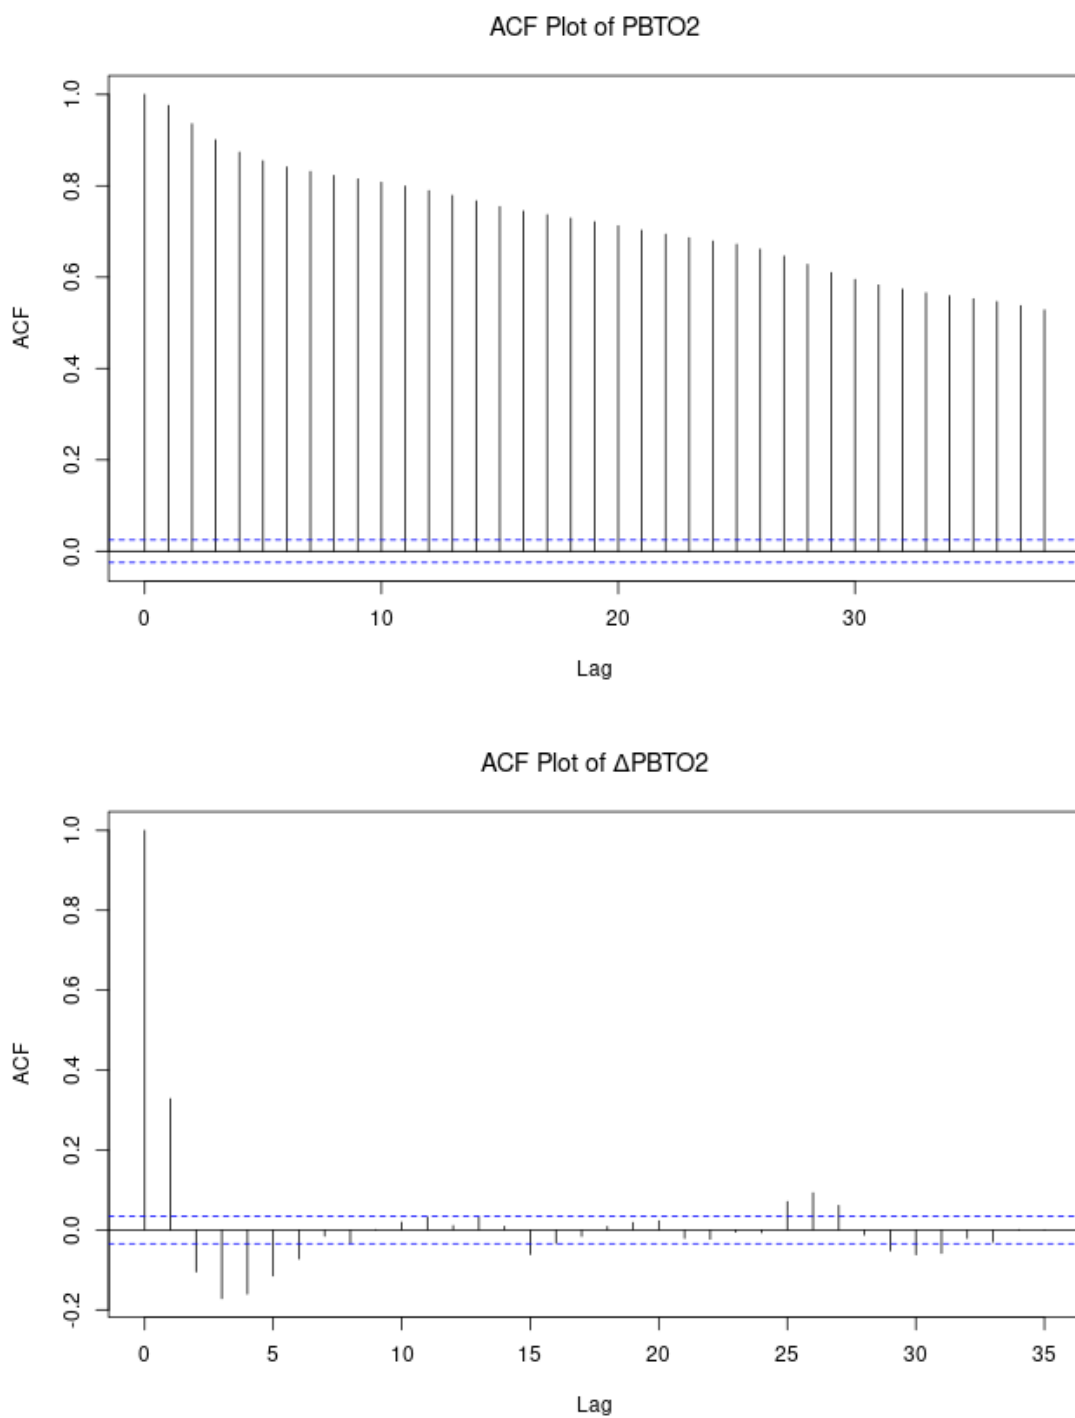

**Supplementary File S1 Figure 10: ACF Plots of PbtO<sub>2</sub> (Top) and  $\Delta$ PbtO<sub>2</sub> (Bottom) for Subject 10**



## Subject 11

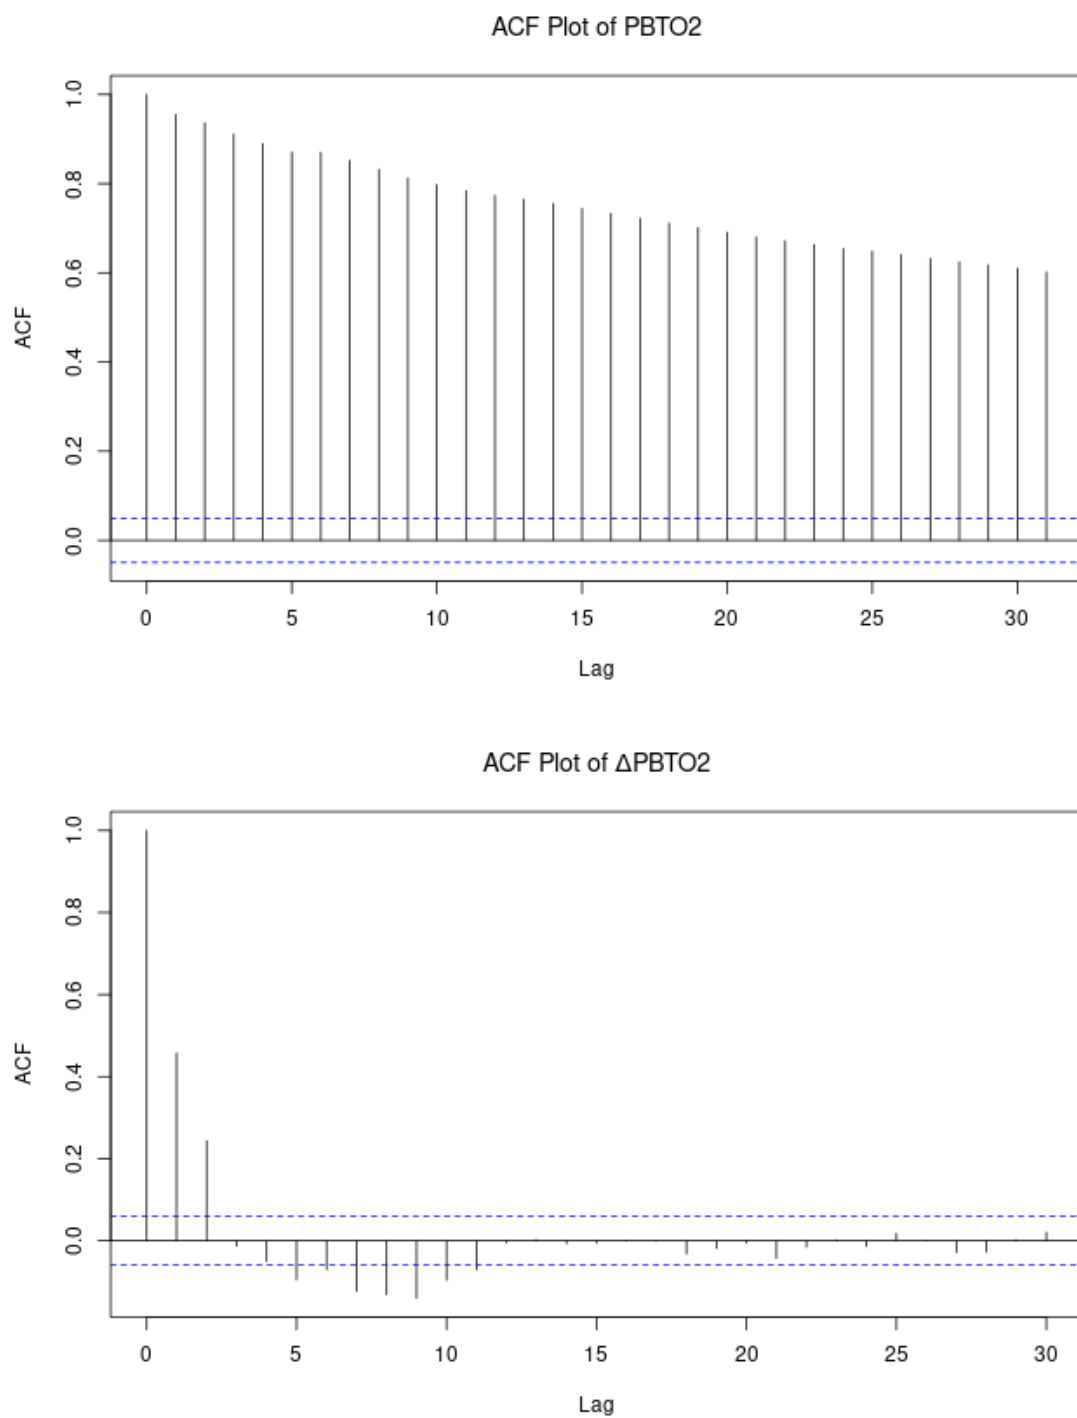

**Supplementary File S1 Figure 11: ACF Plots of PbtO<sub>2</sub> (Top) and  $\Delta$ PbtO<sub>2</sub> (Bottom) for Subject 11**





## Subject 12

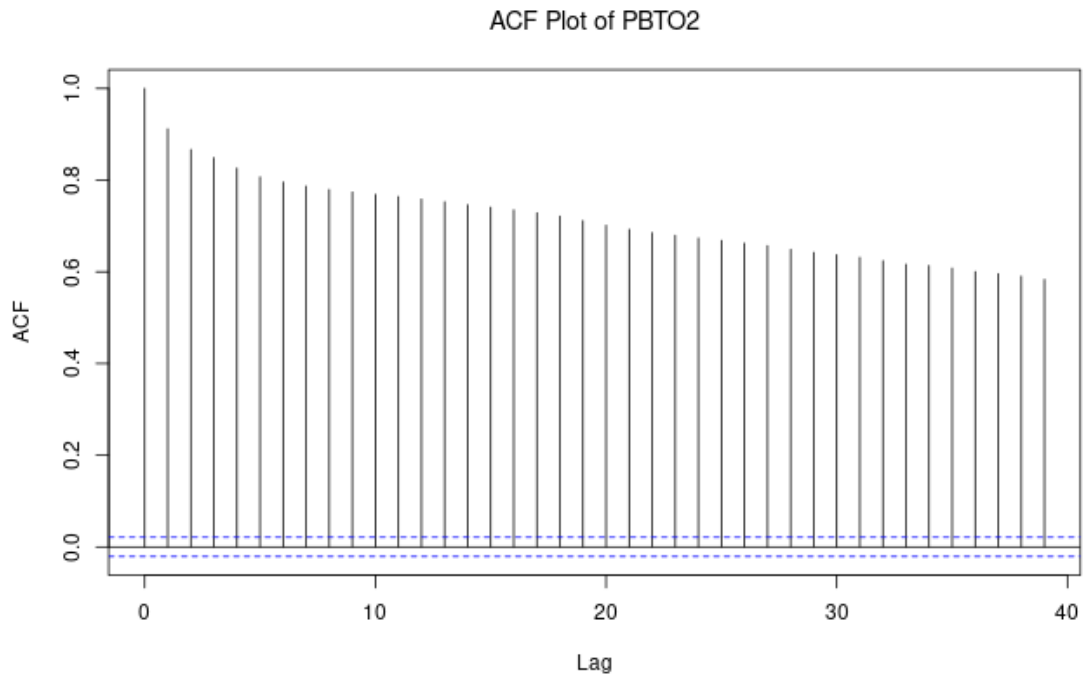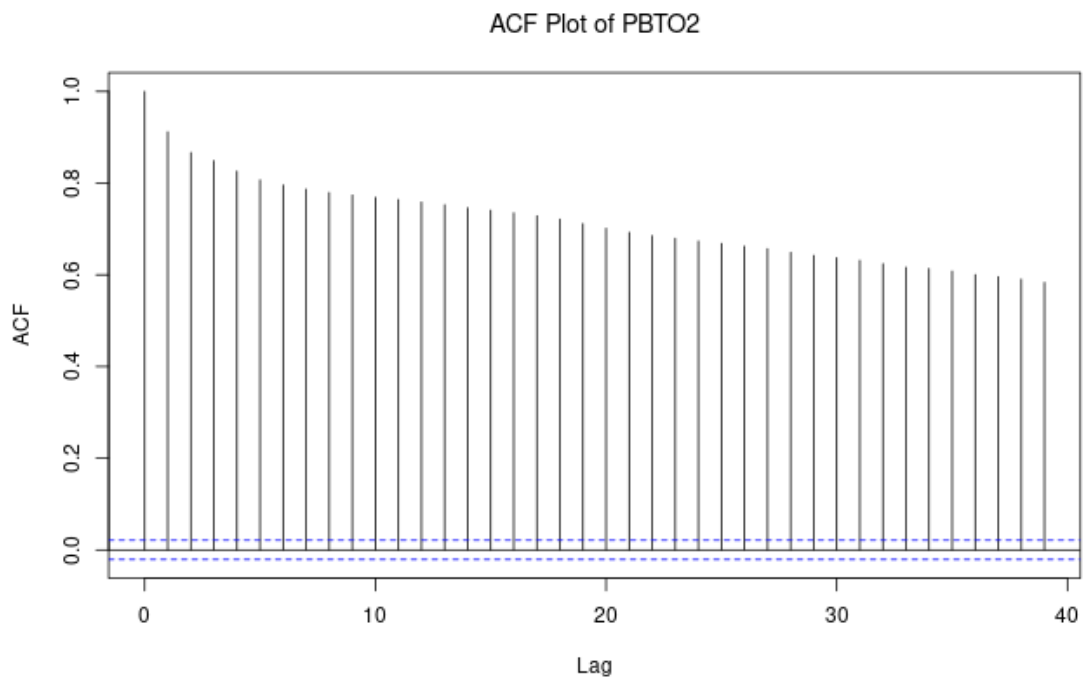

**Supplementary File S1 Figure 12: ACF Plots of PbtO<sub>2</sub> (Top) and  $\Delta$ PbtO<sub>2</sub> (Bottom) for Subject 12**



## Subject 13

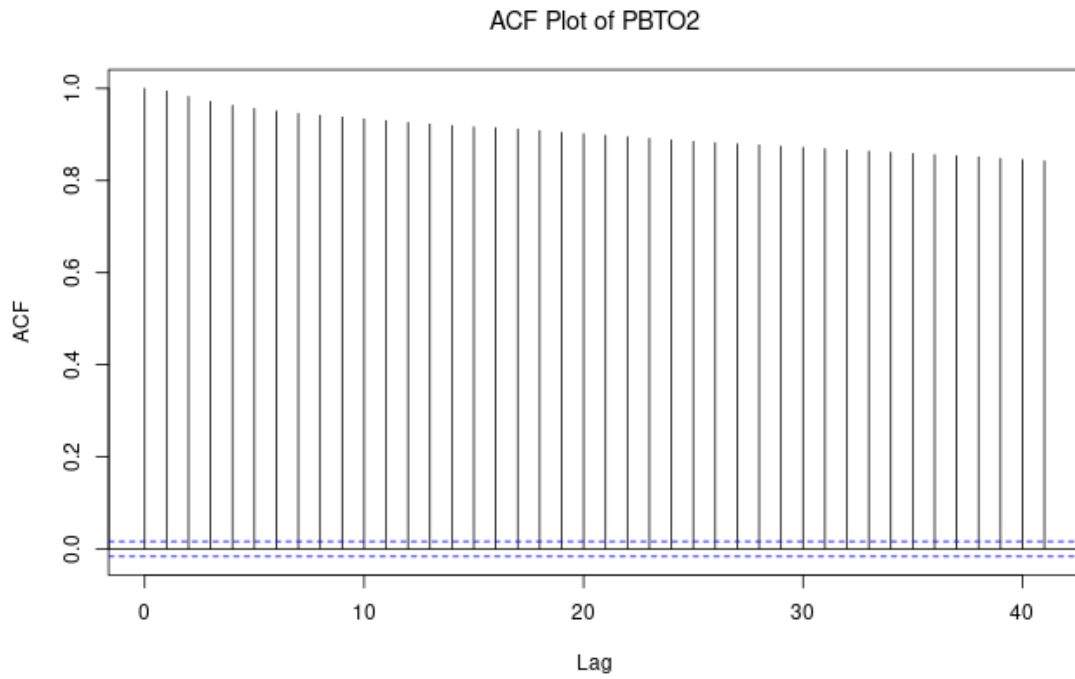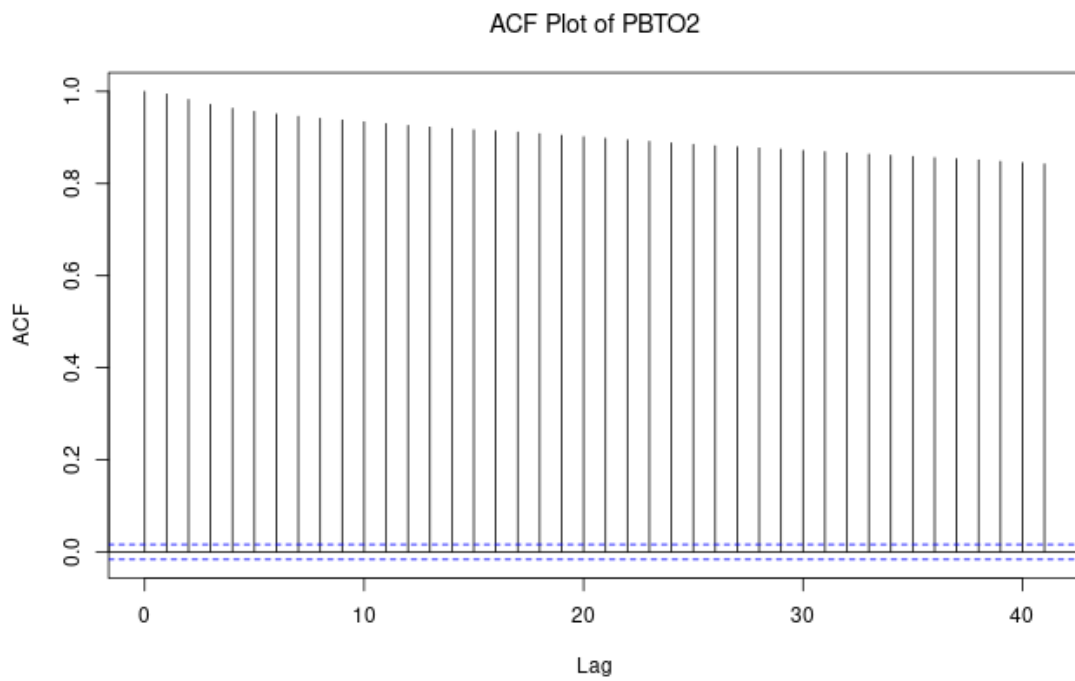

**Supplementary File S1 Figure 13: ACF Plots of  $\text{PbtO}_2$  (Top) and  $\Delta\text{PbtO}_2$  (Bottom) for Subject 13**



## Subject 14

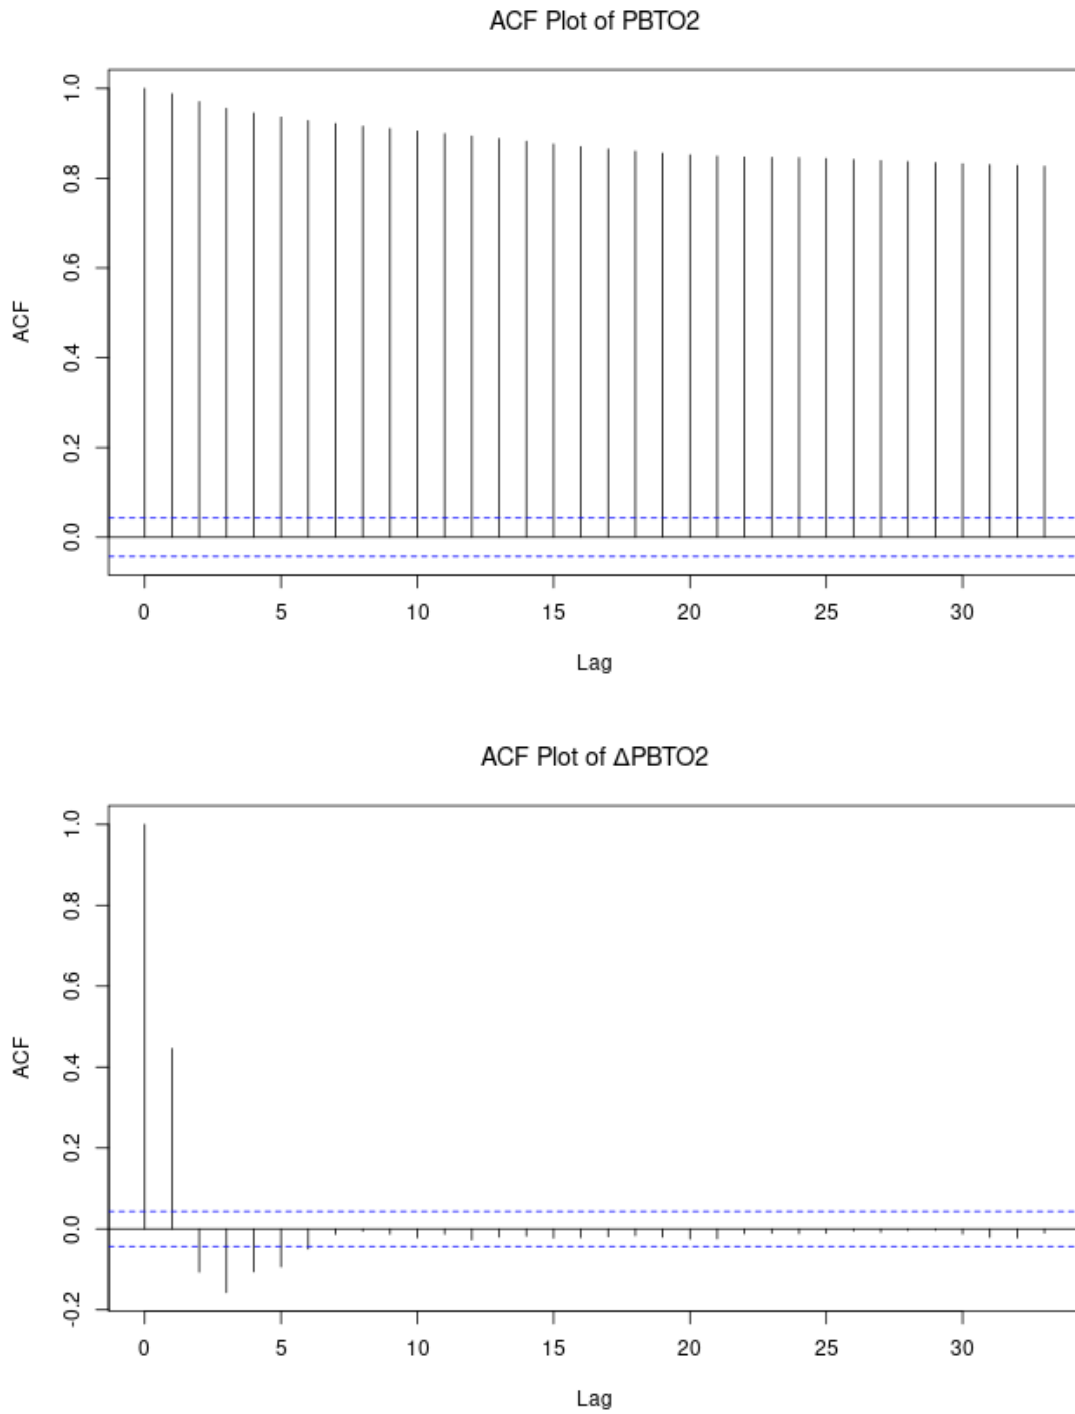

**Supplementary File S1 Figure 14: ACF Plots of PbtO<sub>2</sub> (Top) and  $\Delta$ PbtO<sub>2</sub> (Bottom) for Subject 14**



## Subject 15

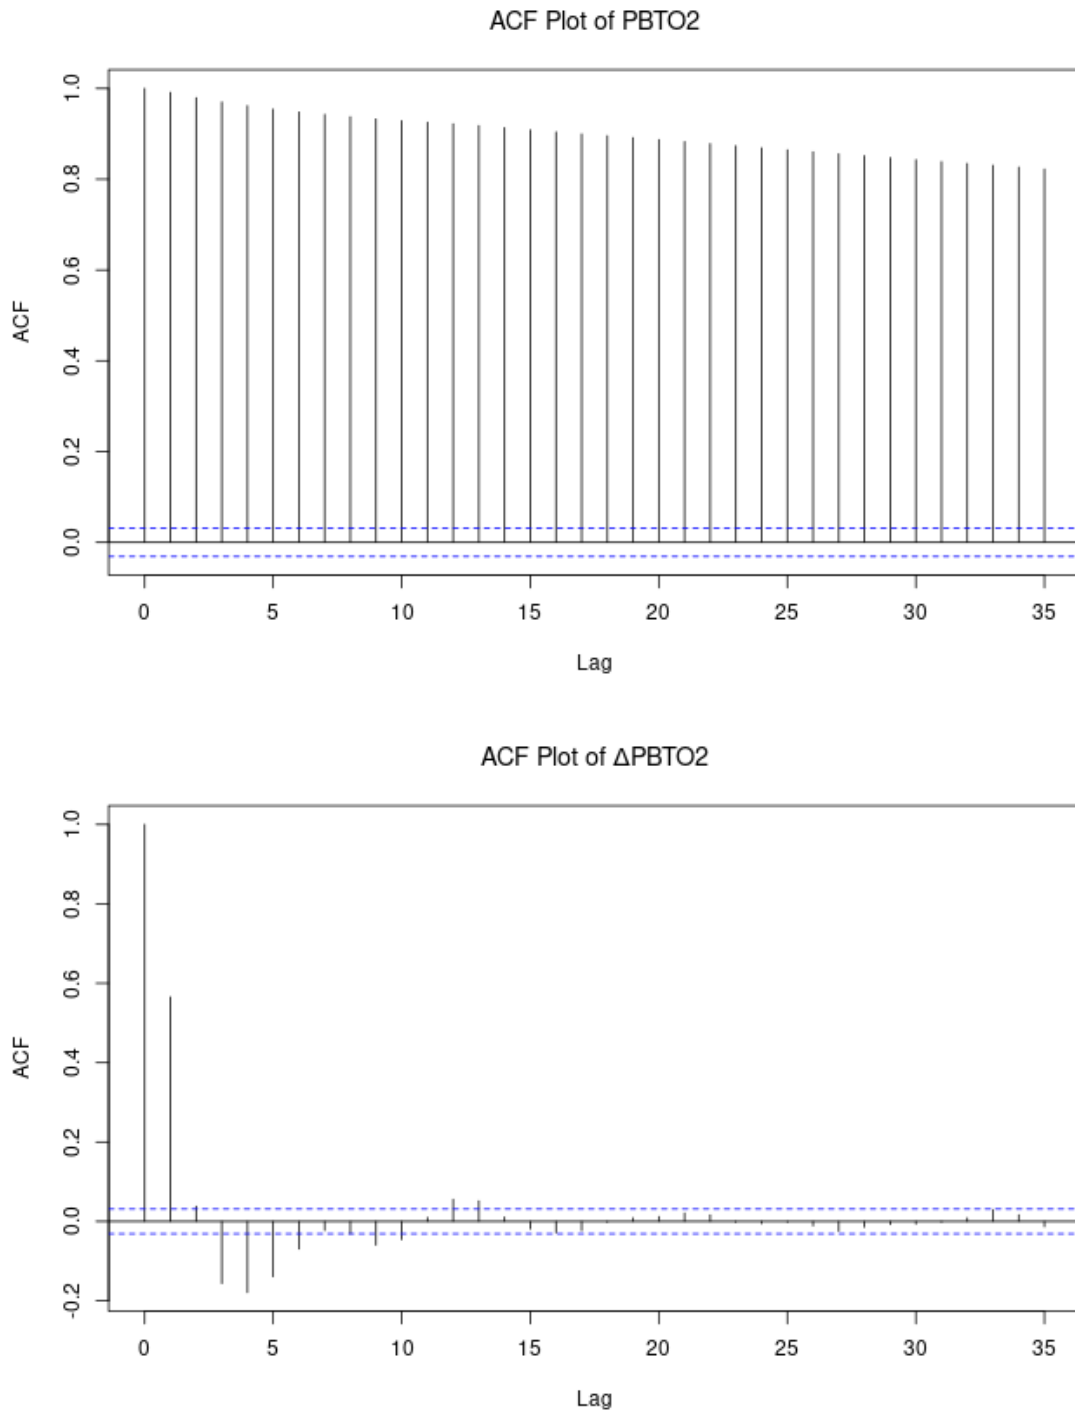

**Supplementary File S1 Figure 15: ACF Plots of PbtO<sub>2</sub> (Top) and  $\Delta$ PbtO<sub>2</sub> (Bottom) for Subject 15**





## Subject 16

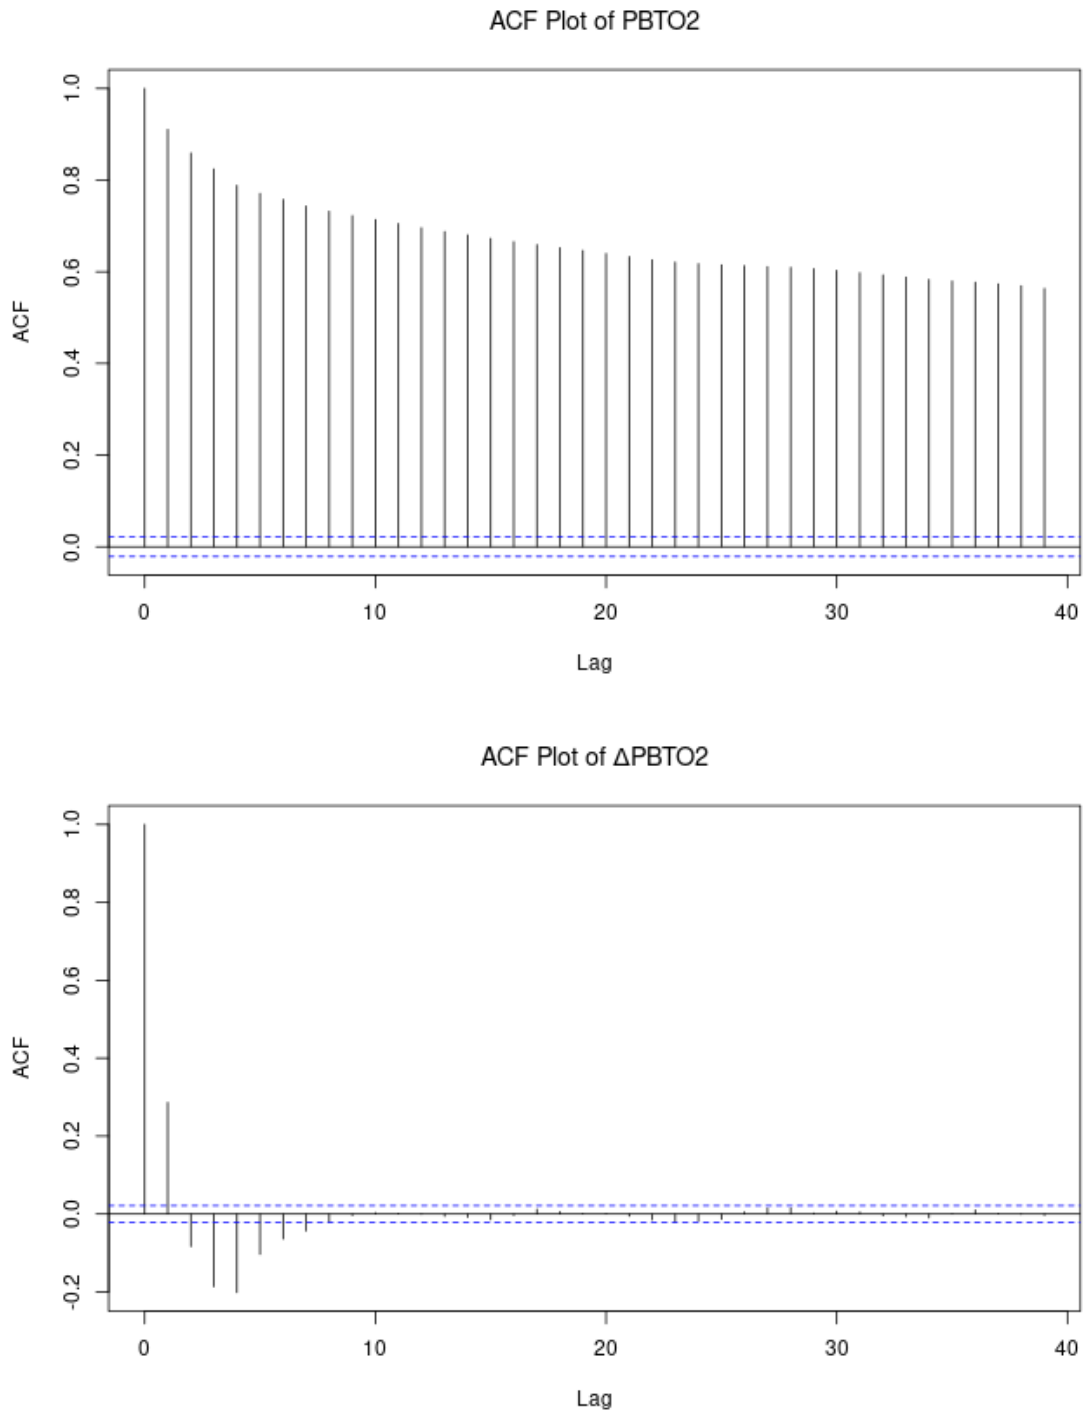

**Supplementary File S1 Figure 16: ACF Plots of PbtO<sub>2</sub> (Top) and  $\Delta$ PbtO<sub>2</sub> (Bottom) for Subject 16**



## Subject 17

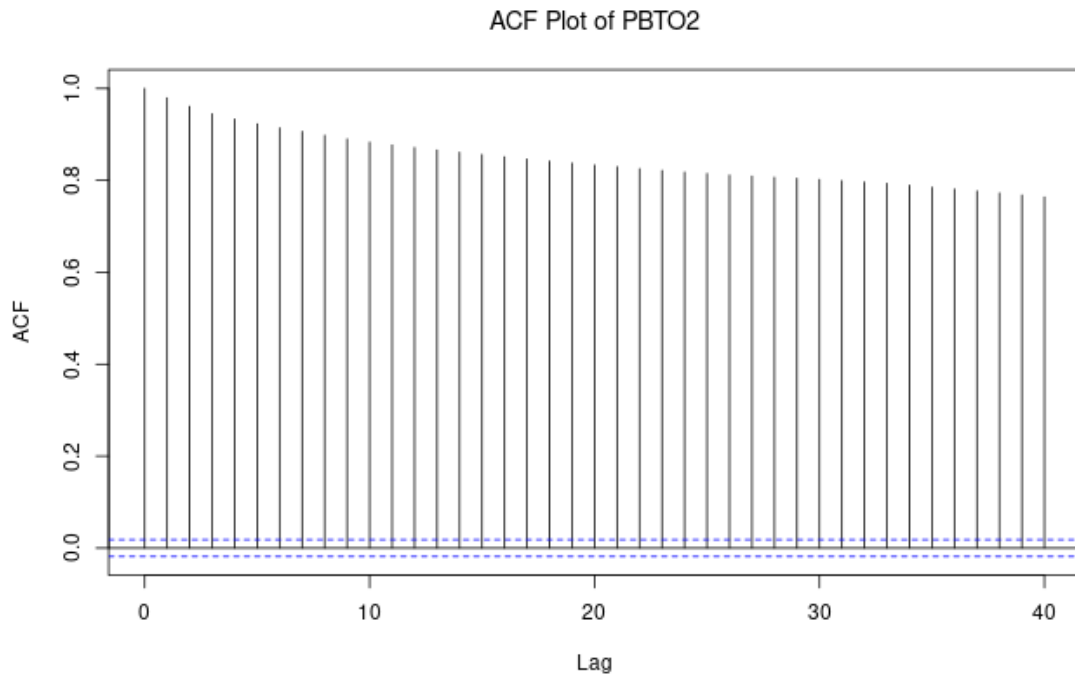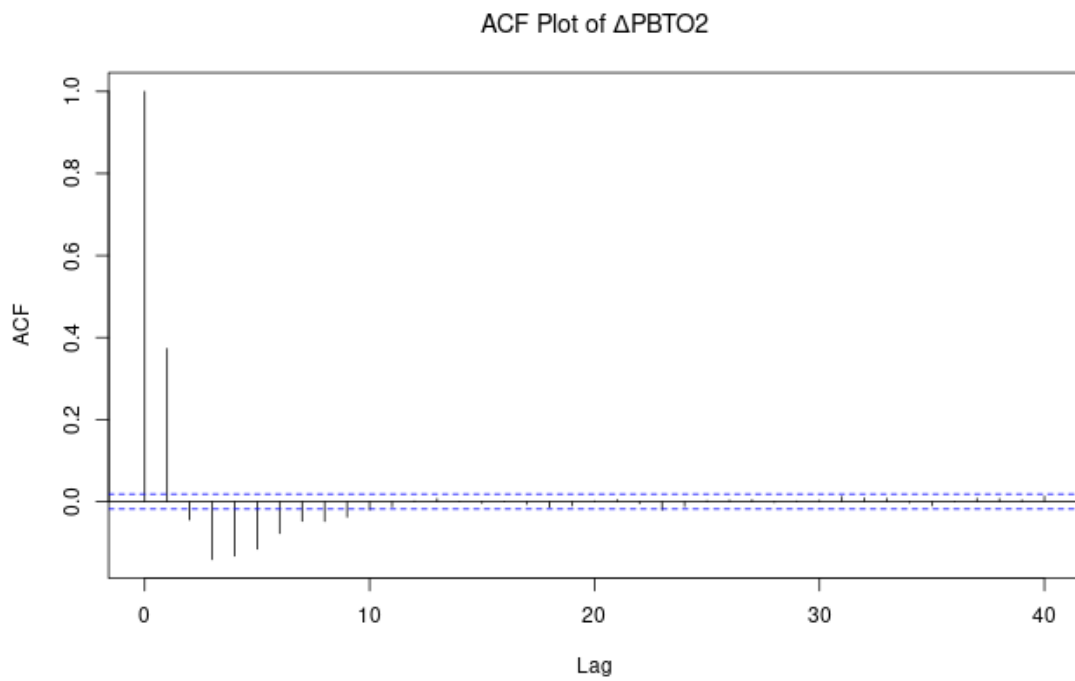

**Supplementary File S1 Figure 17: ACF Plots of PbtO<sub>2</sub> (Top) and  $\Delta$ PbtO<sub>2</sub> (Bottom) for Subject 17**



## Subject 18

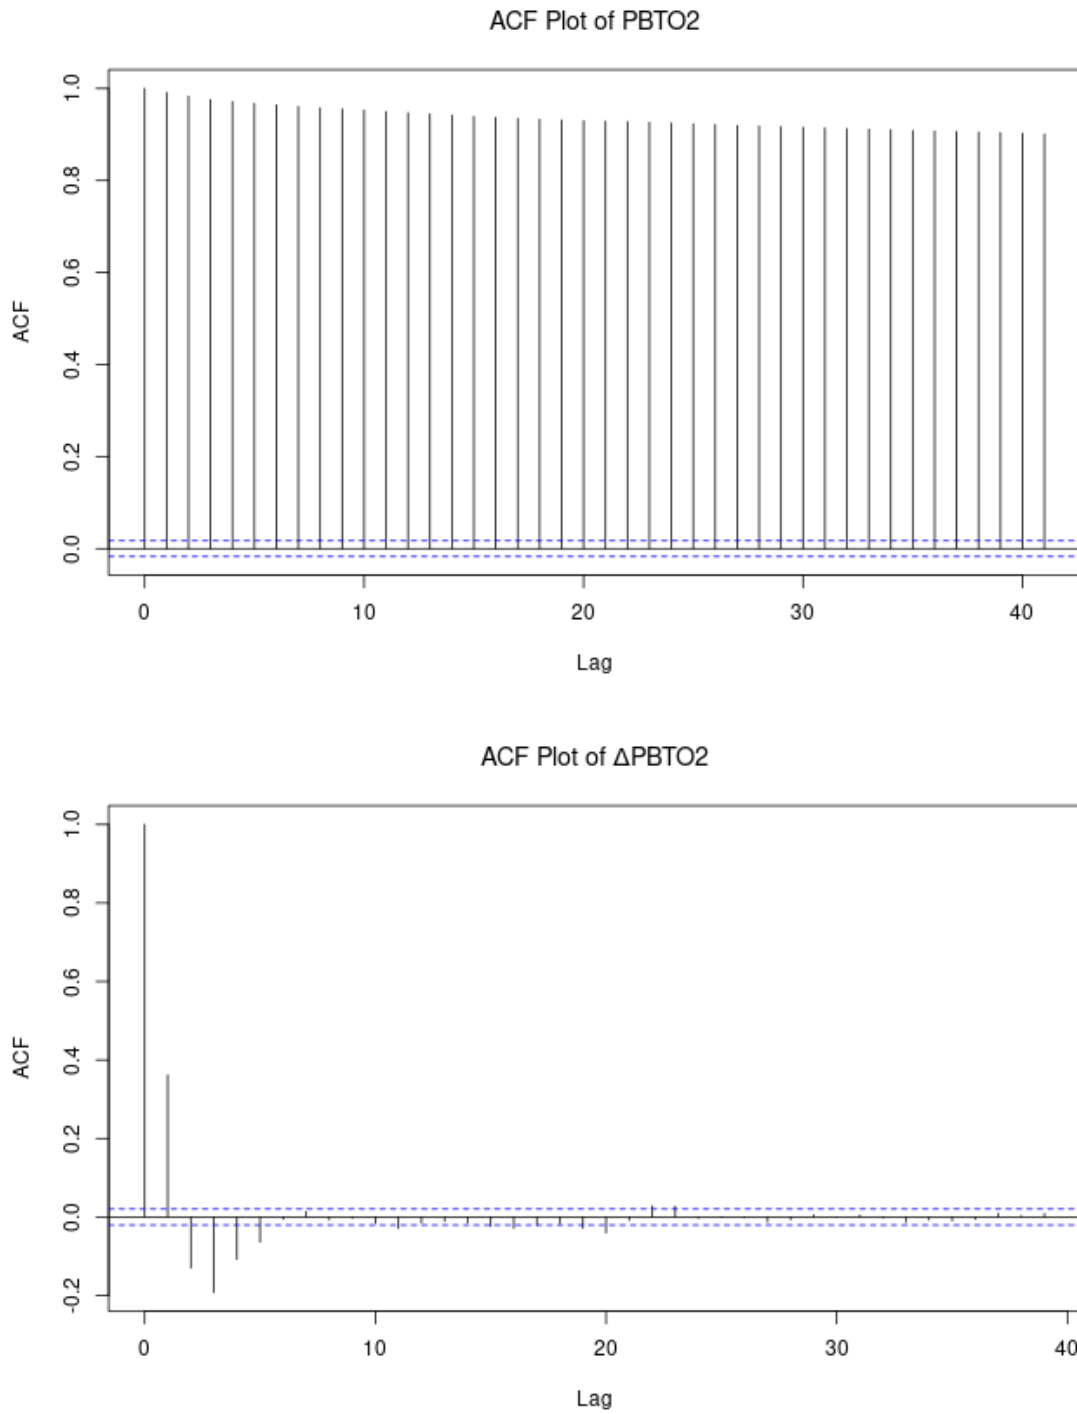

**Supplementary File S1 Figure 18: ACF Plots of PbtO<sub>2</sub> (Top) and  $\Delta$ PbtO<sub>2</sub> (Bottom) for Subject 18**



## Subject 19

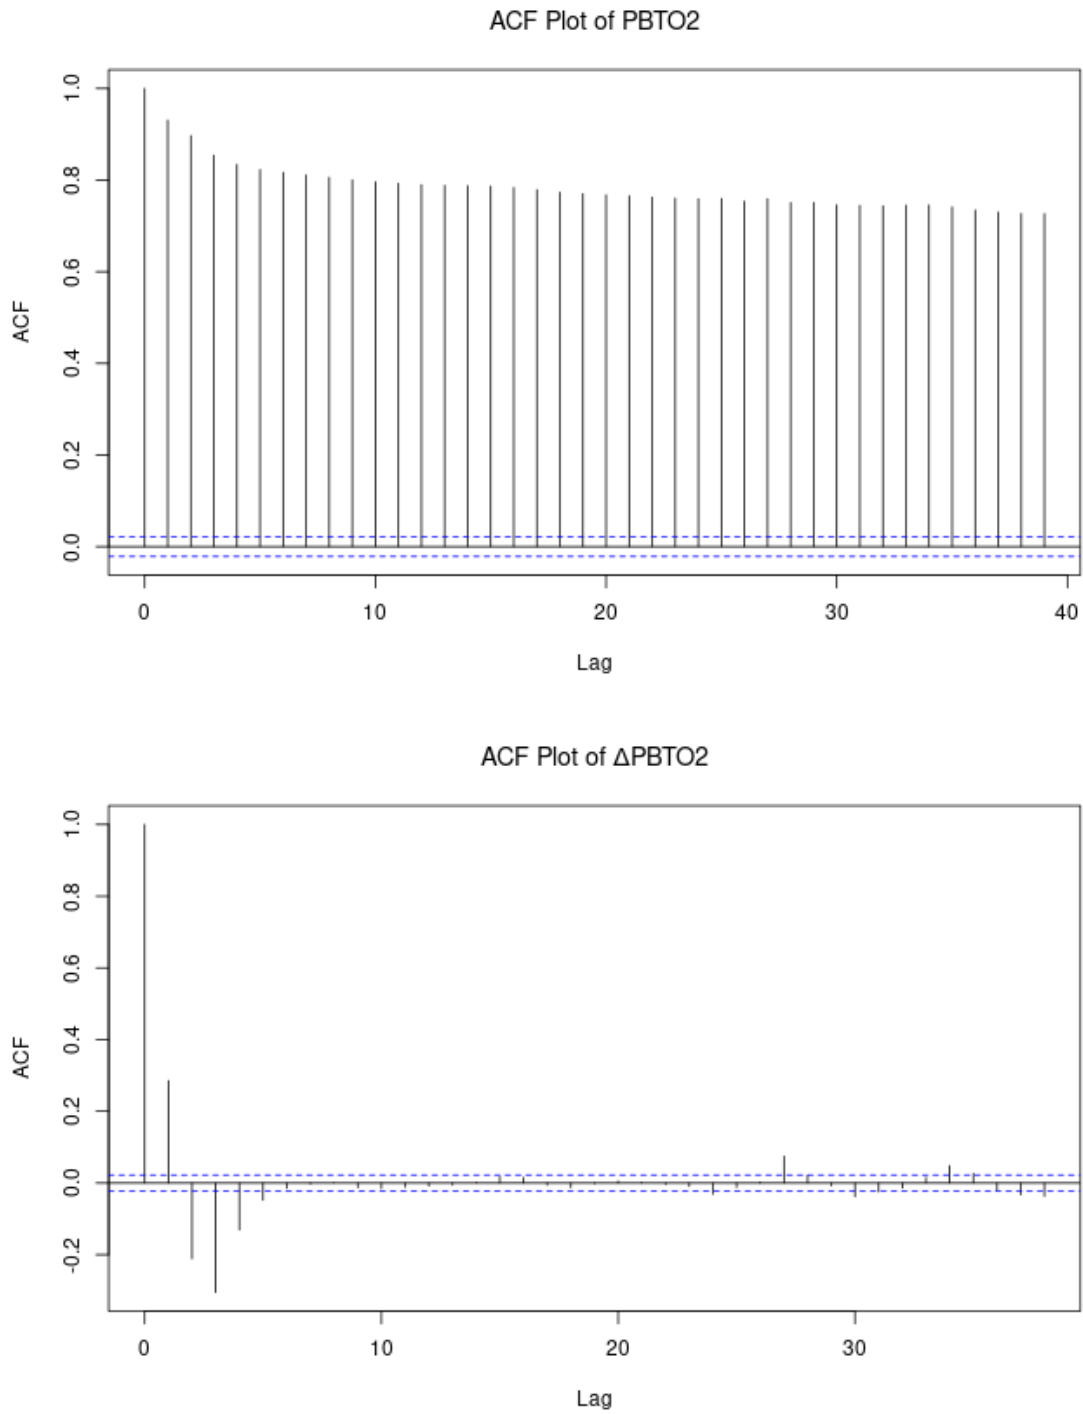

**Supplementary File S1 Figure 19: ACF Plots of PbtO<sub>2</sub> (Top) and  $\Delta$ PbtO<sub>2</sub> (Bottom) for Subject 19**





## Subject 20

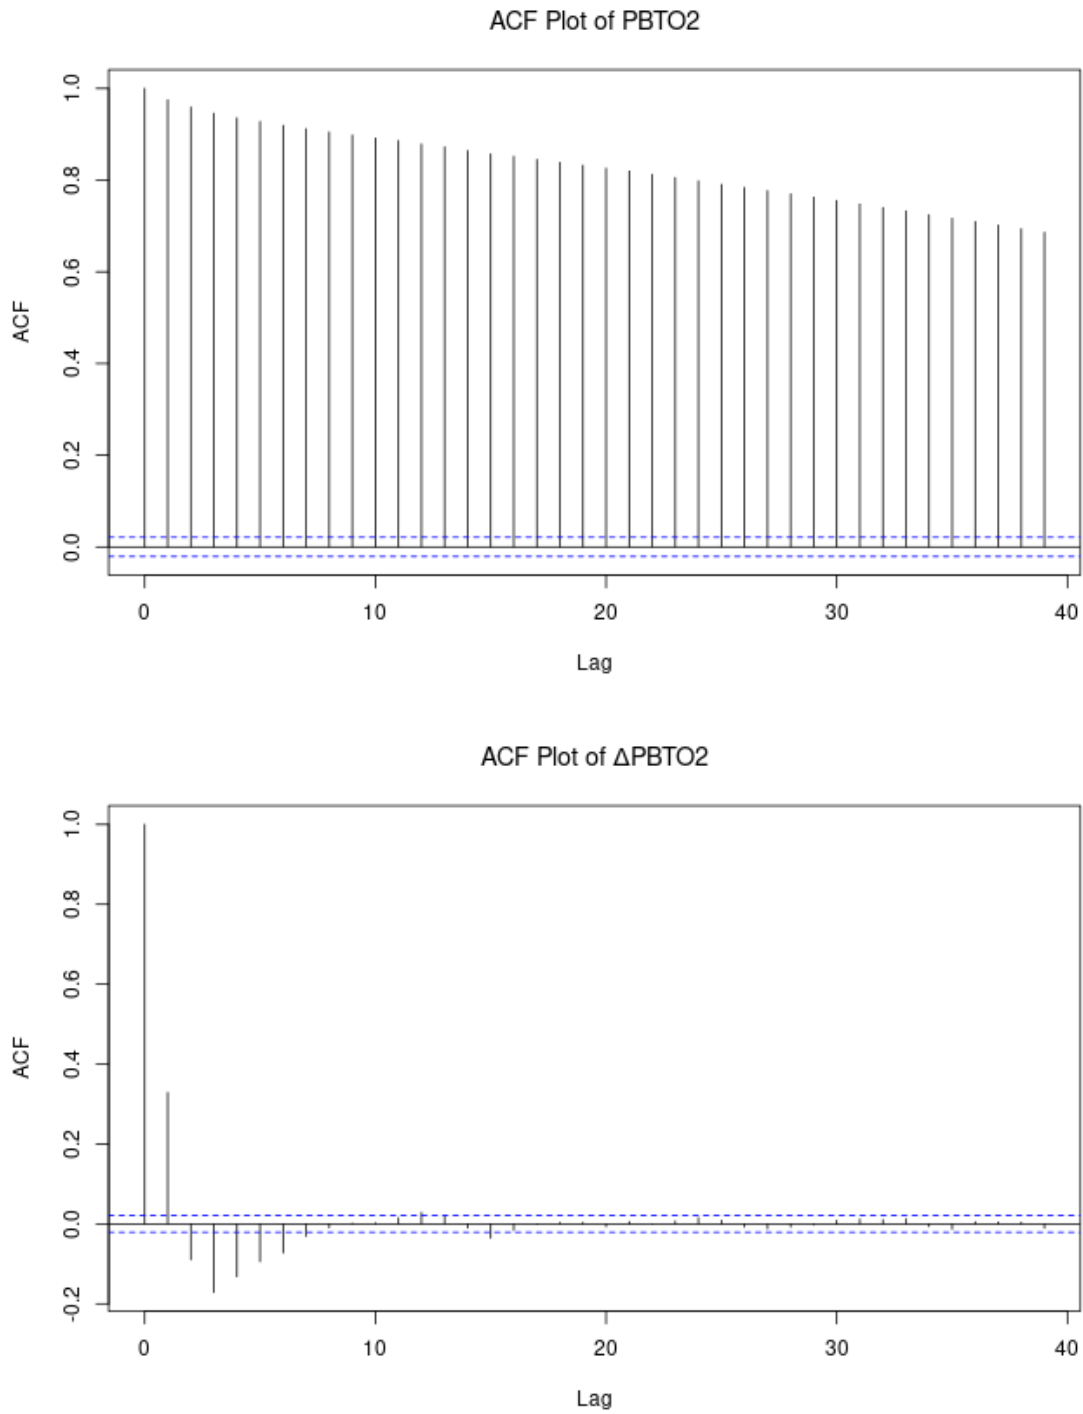

**Supplementary File S1 Figure 20: ACF Plots of PbtO<sub>2</sub> (Top) and  $\Delta$ PbtO<sub>2</sub> (Bottom) for Subject 20**

**2     Supplementary File S2: Evaluation of residuals of the linear  $\Delta PbtO_2 \sim \Delta rSO_2Lag1$  models to ensure autocorrelative structure was accounted for**

**Plot Legend:** *For the following plots the dashed blue line represents the significance levels which were set to a correlation level of  $\pm(2/N^{1/2})$ , where  $N$  is the number of samples. ACF = Autocorrelative function, PACF = Partial Autocorrelative function,  $\Delta PbtO_2$  = change in brain tissue oxygen tension,  $\Delta rSO_2Lag1$  = the one-minute lagged change in regional cerebral oxygen saturation.*

## Subject 1

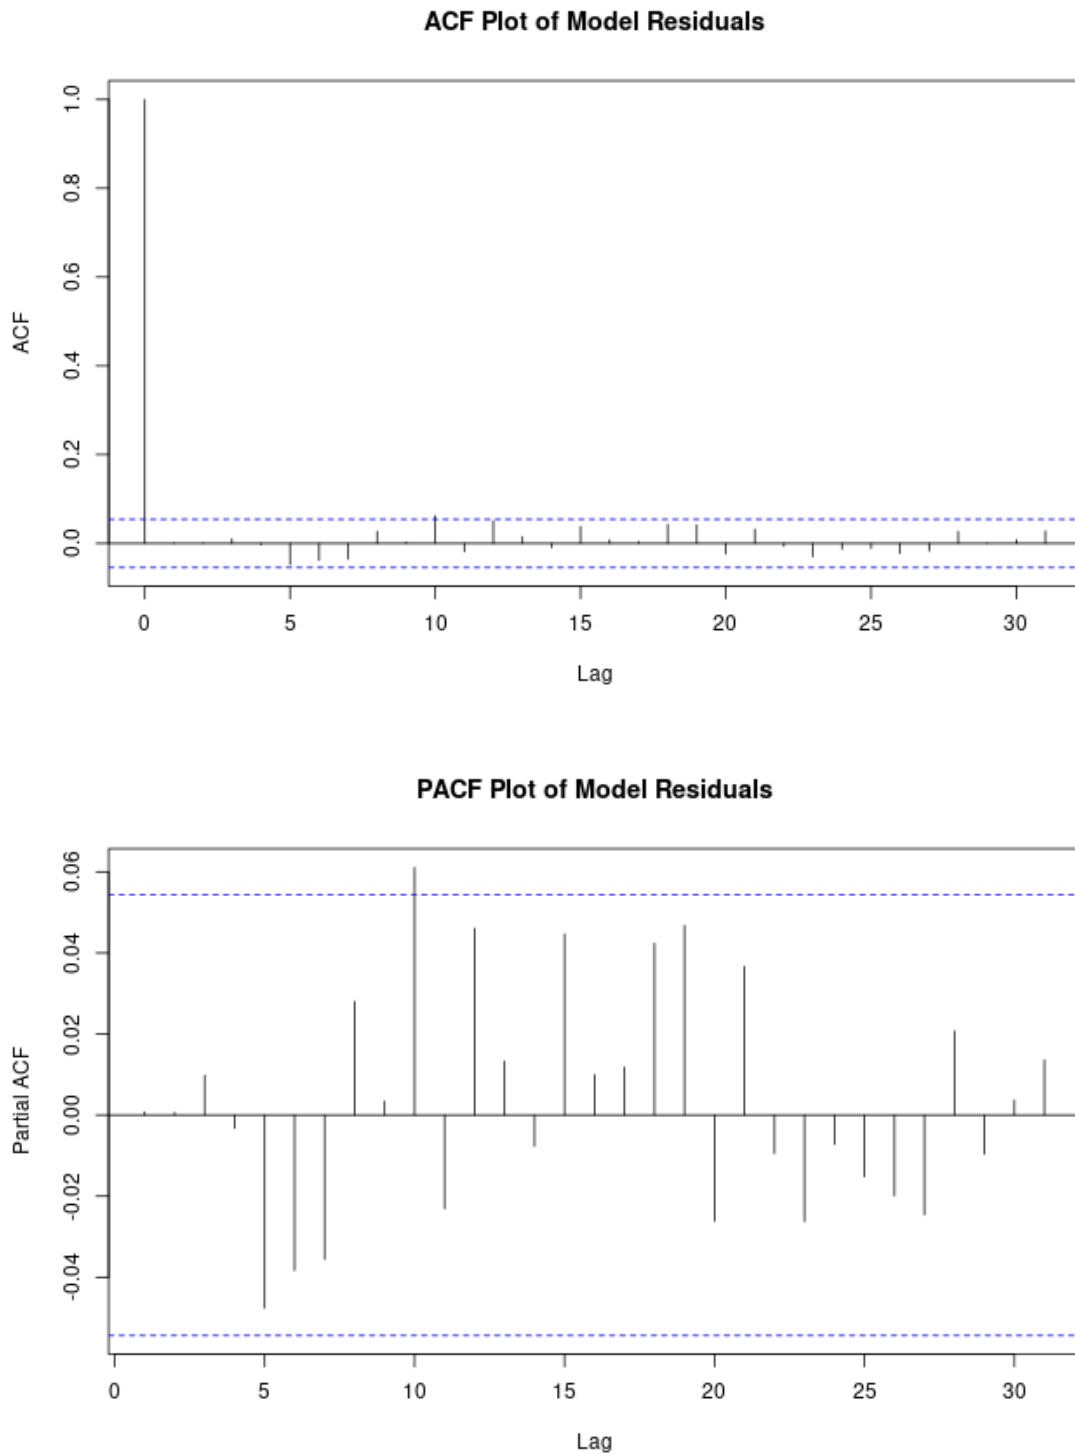

**Supplementary File S2 Figure 1: Evaluation residuals of the linear  $\Delta\text{PbtO}_2 \sim \Delta\text{rSO}_2\text{Lag1}$  models to ensure autocorrelative structure was accounted for. ACF (top) and PACF (bottom) plots of residuals of the model for Subject 1**

**Subject 2**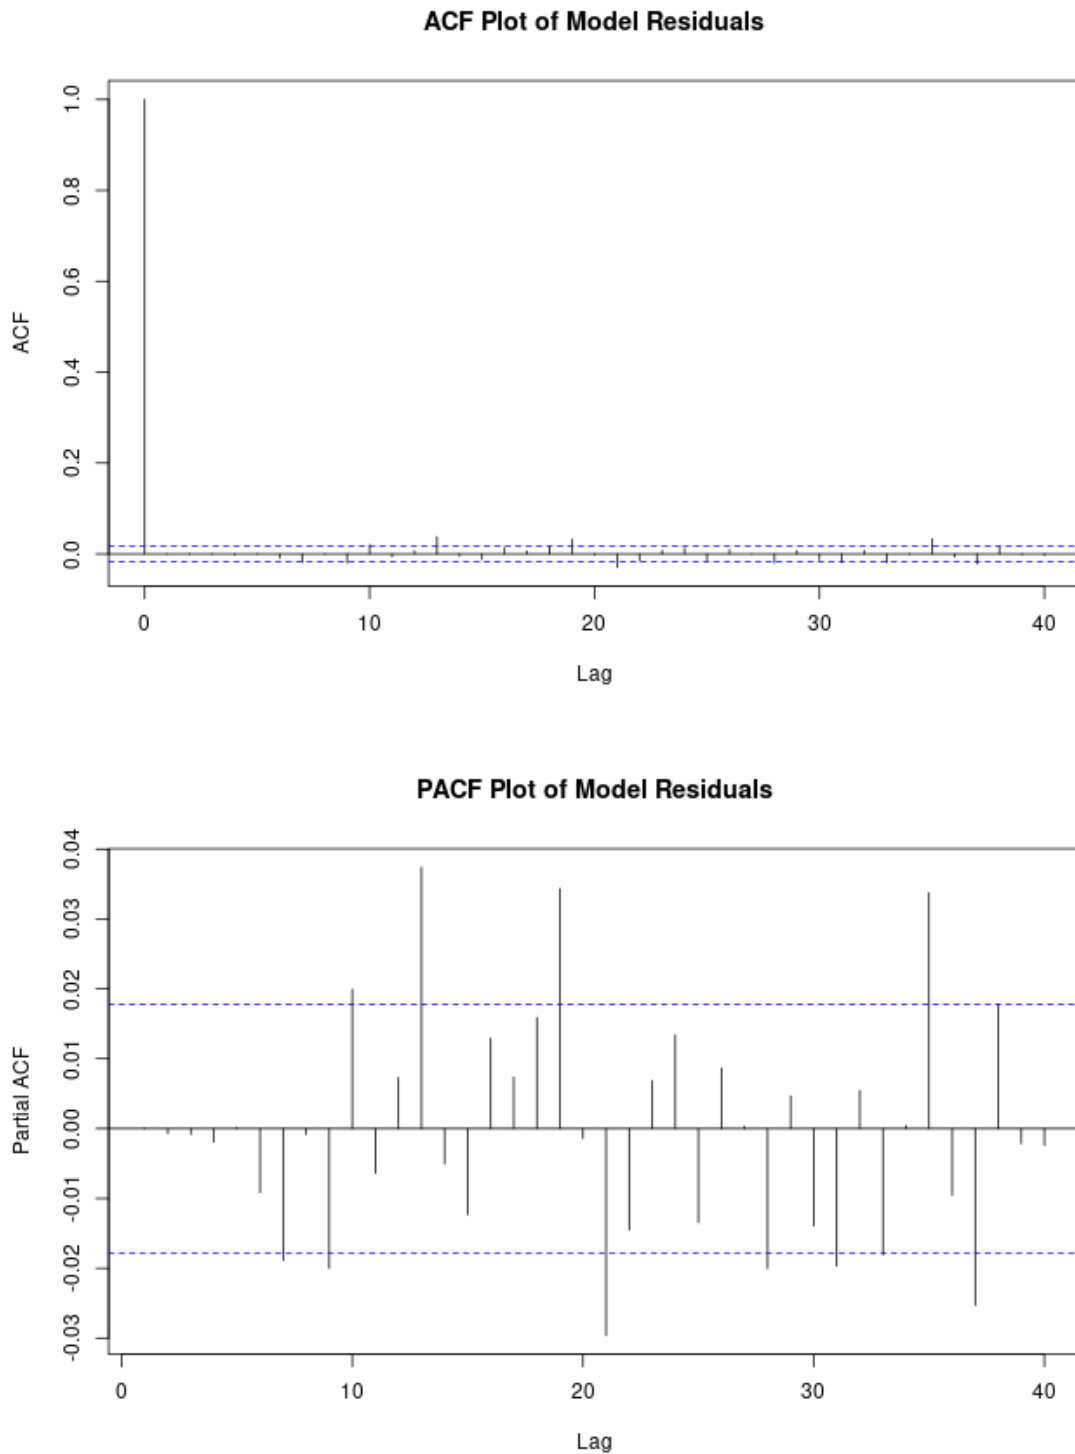

**Supplementary File S2 Figure 2: Evaluation residuals of the linear  $\Delta\text{PbtO}_2 \sim \Delta\text{rSO}_2\text{Lag1}$  models to ensure autocorrelative structure was accounted for. ACF (top) and PACF (bottom) plots of residuals of the model for Subject 2**

### Subject 3

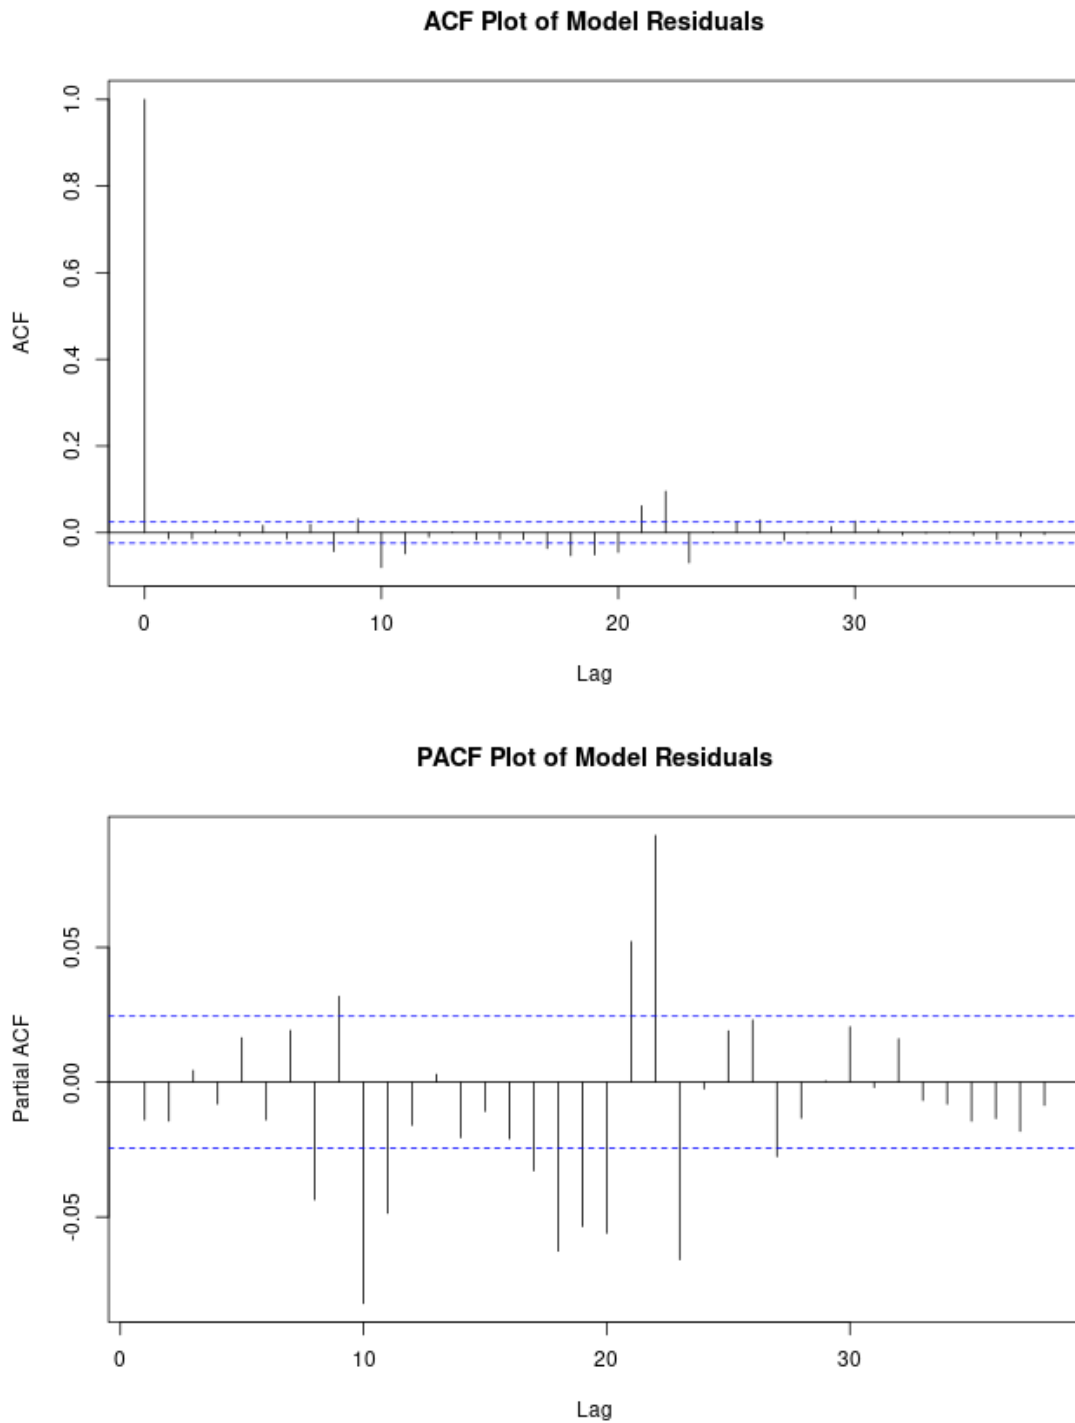

**Supplementary File S2 Figure 3: Evaluation residuals of the linear  $\Delta\text{PbtO}_2 \sim \Delta\text{rSO}_2\text{Lag1}$  models to ensure autocorrelative structure was accounted for. ACF (top) and PACF (bottom) plots of residuals of the model for Subject 3**

**Subject 4**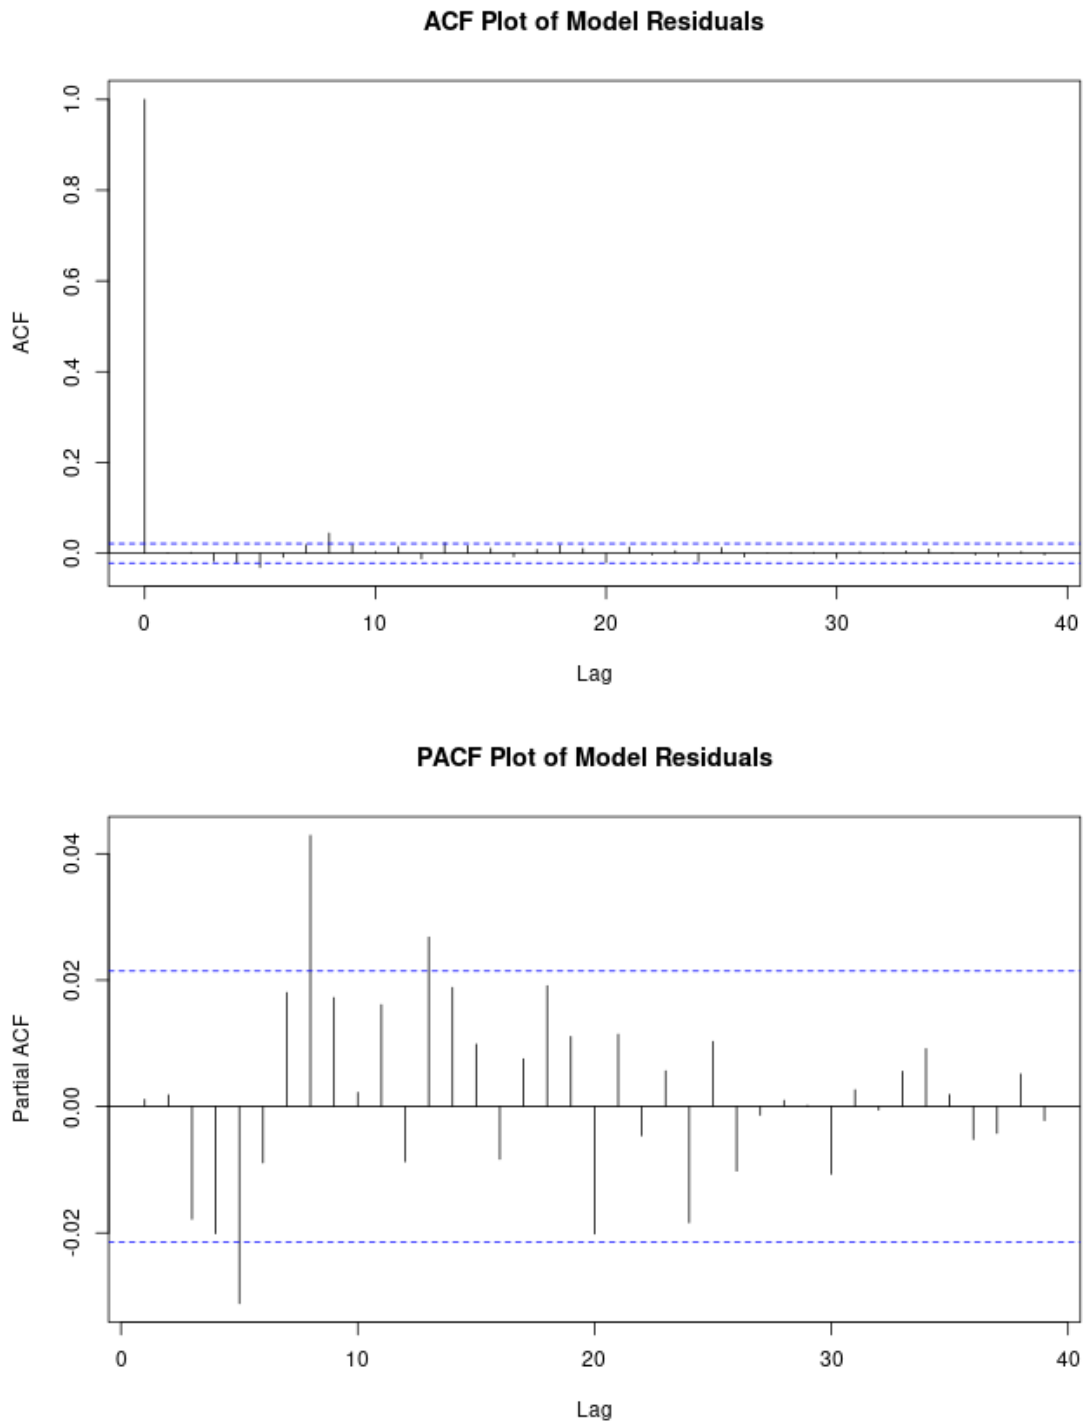

**Supplementary File S2 Figure 4: Evaluation residuals of the linear  $\Delta\text{PbtO}_2 \sim \Delta\text{rSO}_2\text{Lag1}$  models to ensure autocorrelative structure was accounted for. ACF (top) and PACF (bottom) plots of residuals of the model for Subject 4**

## Subject 5

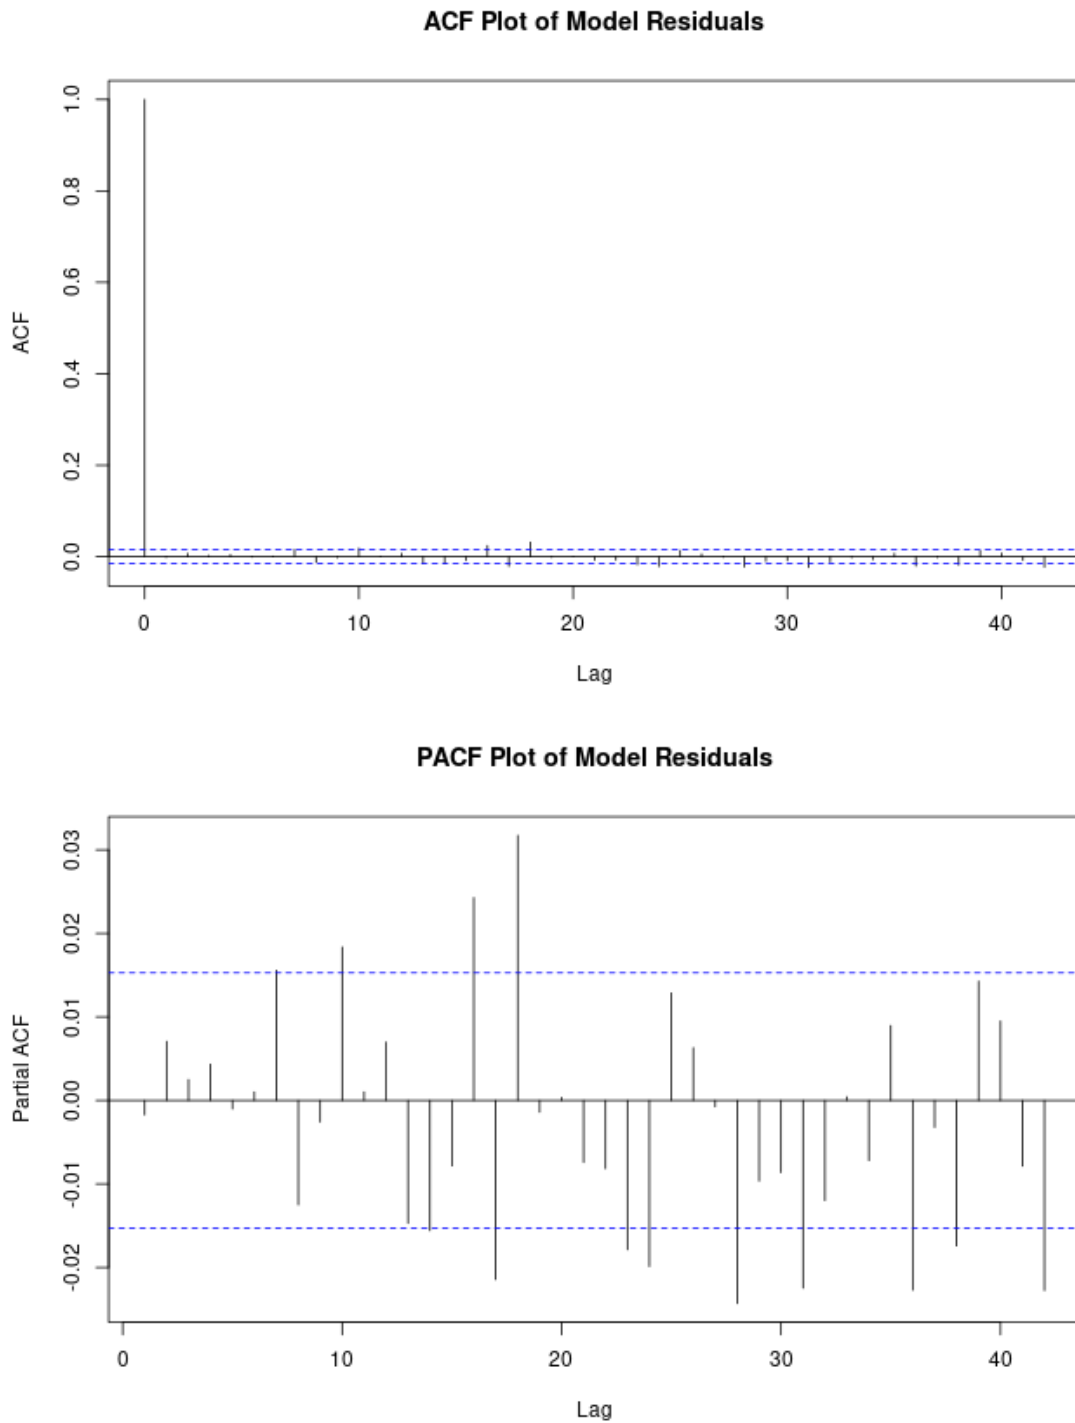

**Supplementary File S2 Figure 5: Evaluation residuals of the linear  $\Delta\text{PbtO}_2 \sim \Delta\text{rSO}_2\text{Lag1}$  models to ensure autocorrelative structure was accounted for. ACF (top) and PACF (bottom) plots of residuals of the model for Subject 5**

## Subject 6

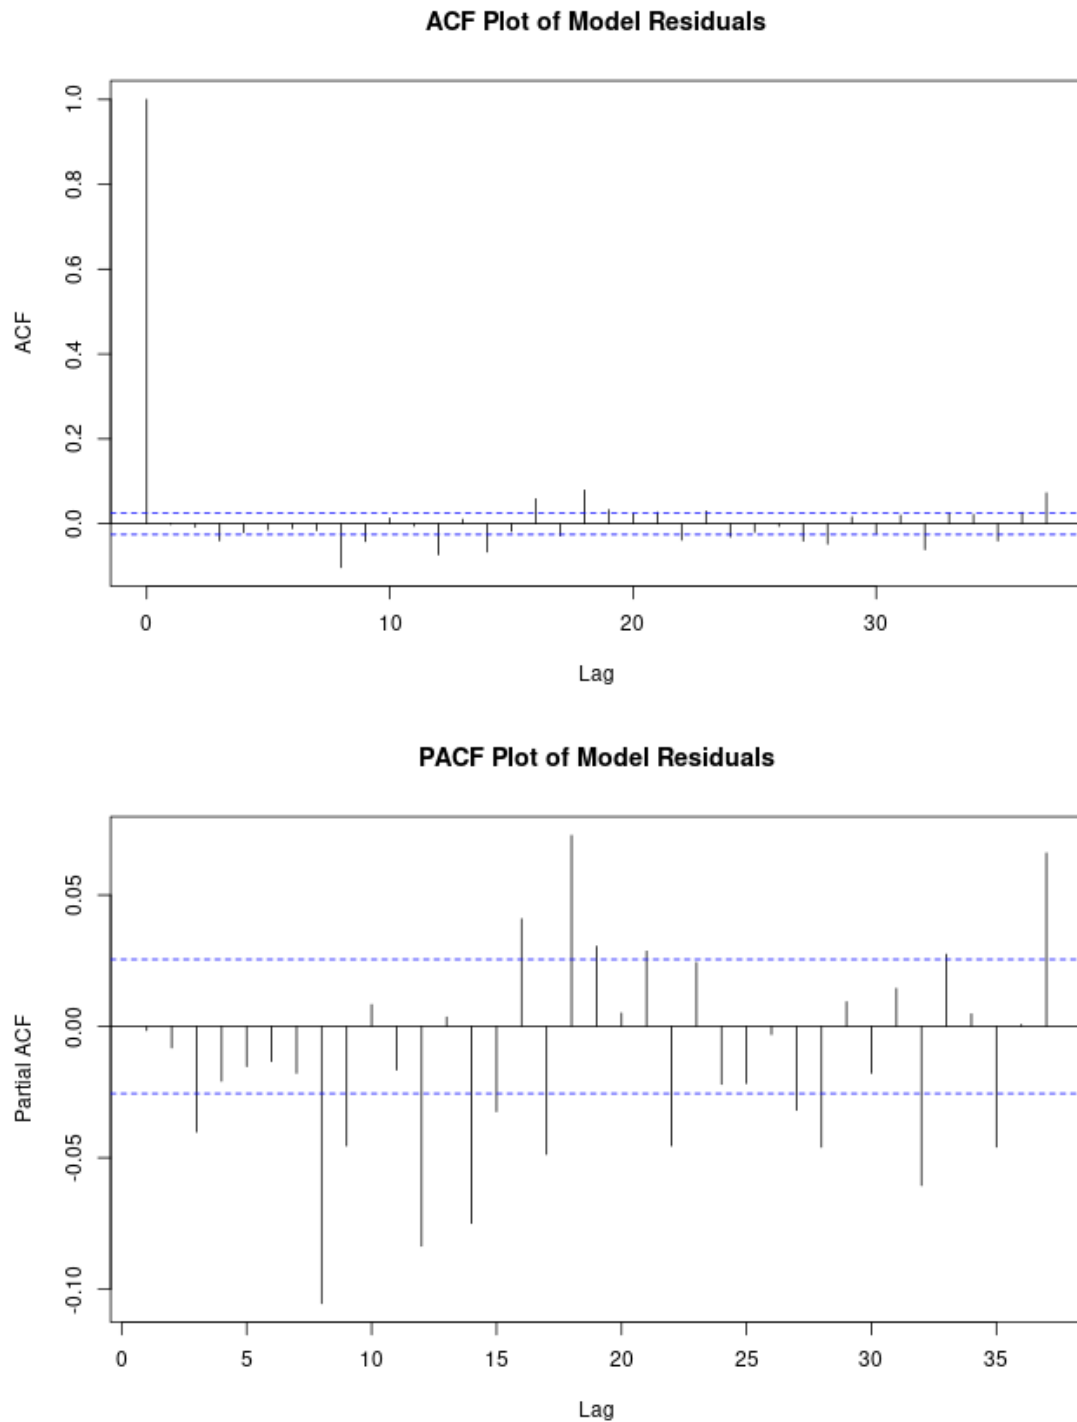

**Supplementary File S2 Figure 6: Evaluation residuals of the linear  $\Delta\text{PbtO}_2 \sim \Delta\text{rSO}_2\text{Lag1}$  models to ensure autocorrelative structure was accounted for. ACF (top) and PACF (bottom) plots of residuals of the model for Subject 6**



## Subject 7

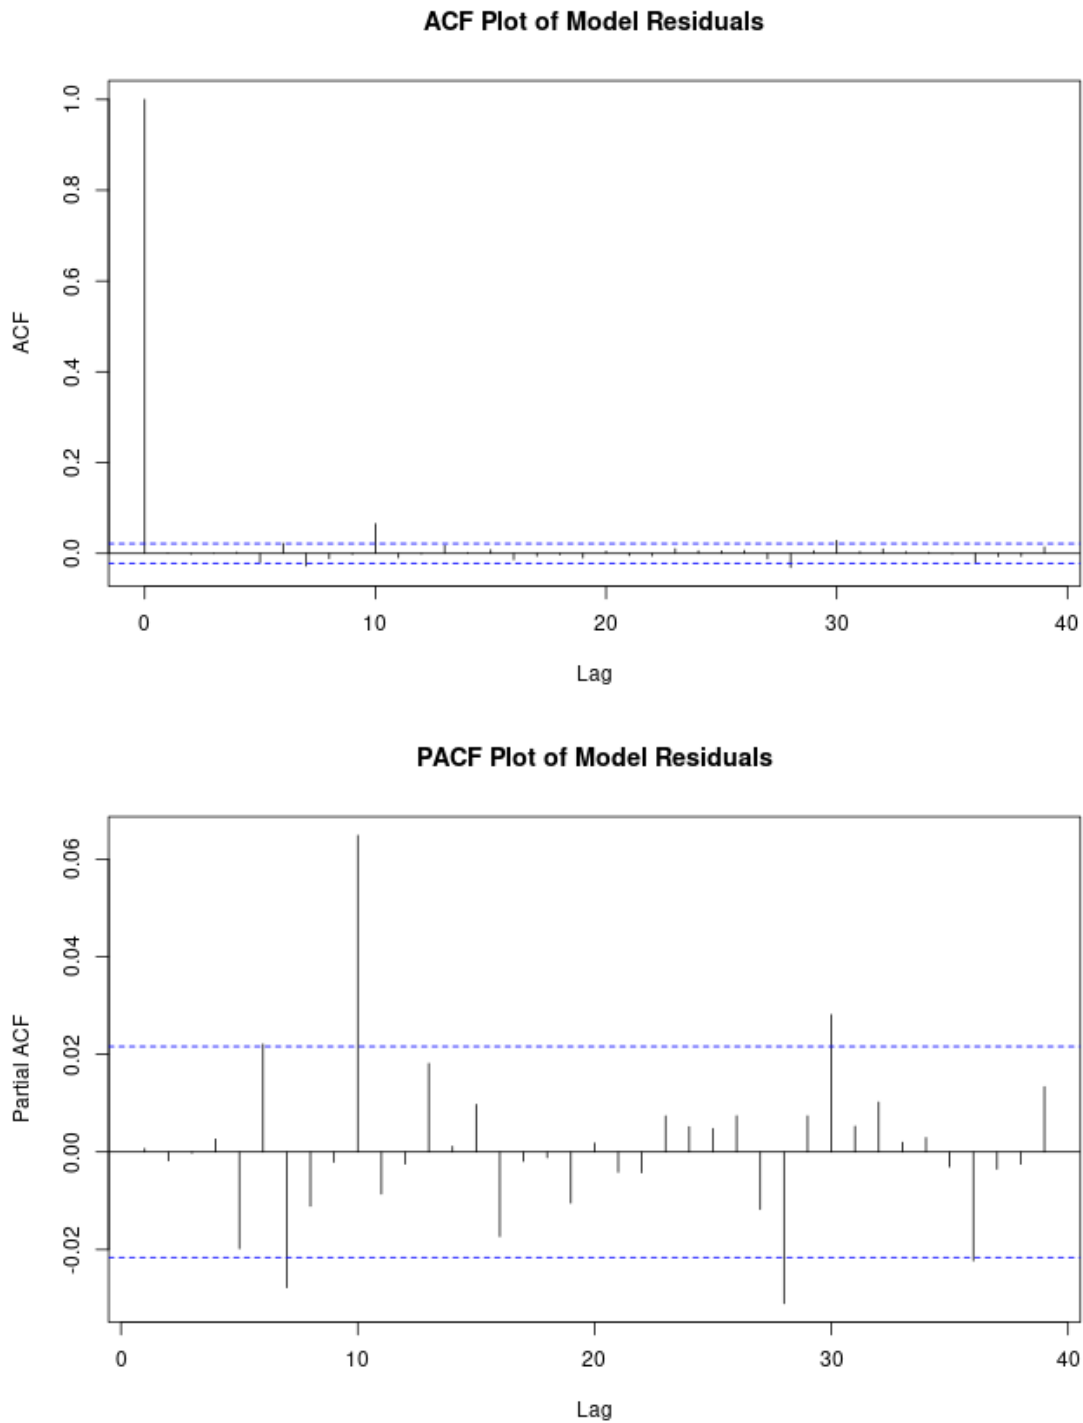

**Supplementary File S2 Figure 7: Evaluation residuals of the linear  $\Delta\text{PbtO}_2 \sim \Delta\text{rSO}_2\text{Lag1}$  models to ensure autocorrelative structure was accounted for. ACF (top) and PACF (bottom) plots of residuals of the model for Subject 7**

## Subject 8

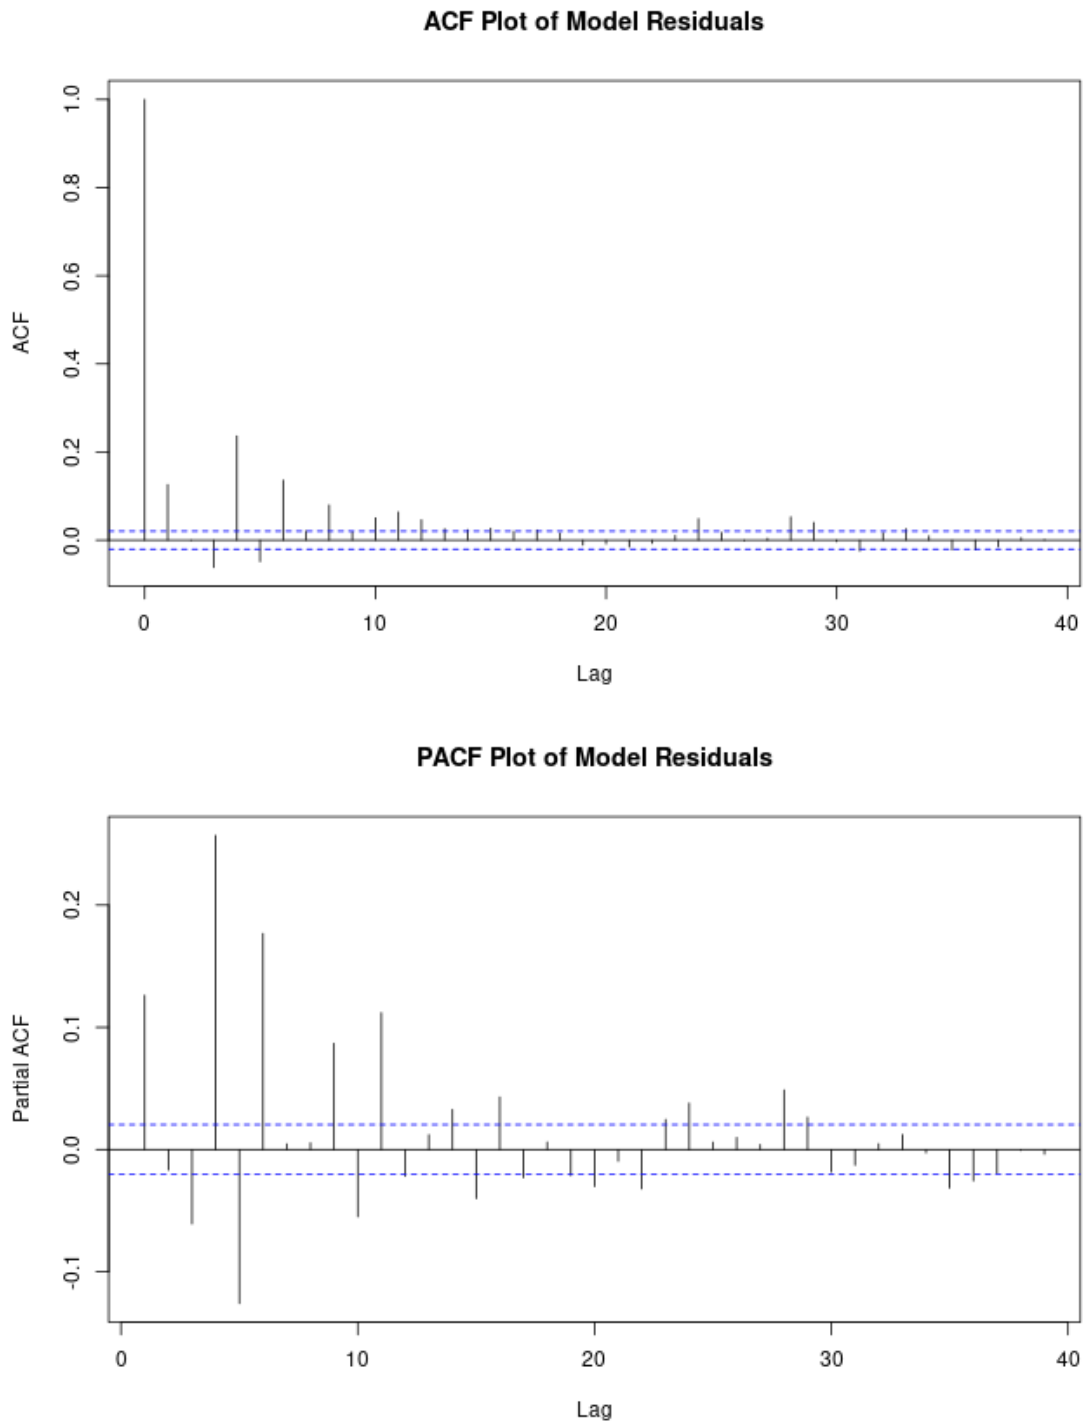

**Supplementary File S2 Figure 8: Evaluation residuals of the linear  $\Delta\text{PbtO}_2 \sim \Delta\text{rSO}_2\text{Lag1}$  models to ensure autocorrelative structure was accounted for. ACF (top) and PACF (bottom) plots of residuals of the model for Subject 8**

## Subject 9

ACF Plot of Model Residuals

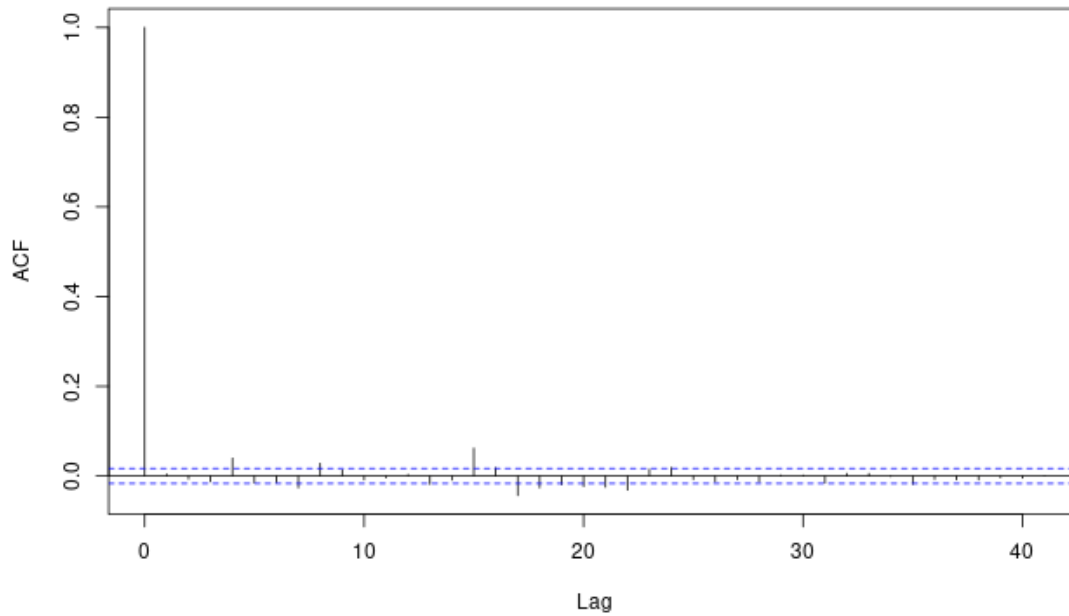

PACF Plot of Model Residuals

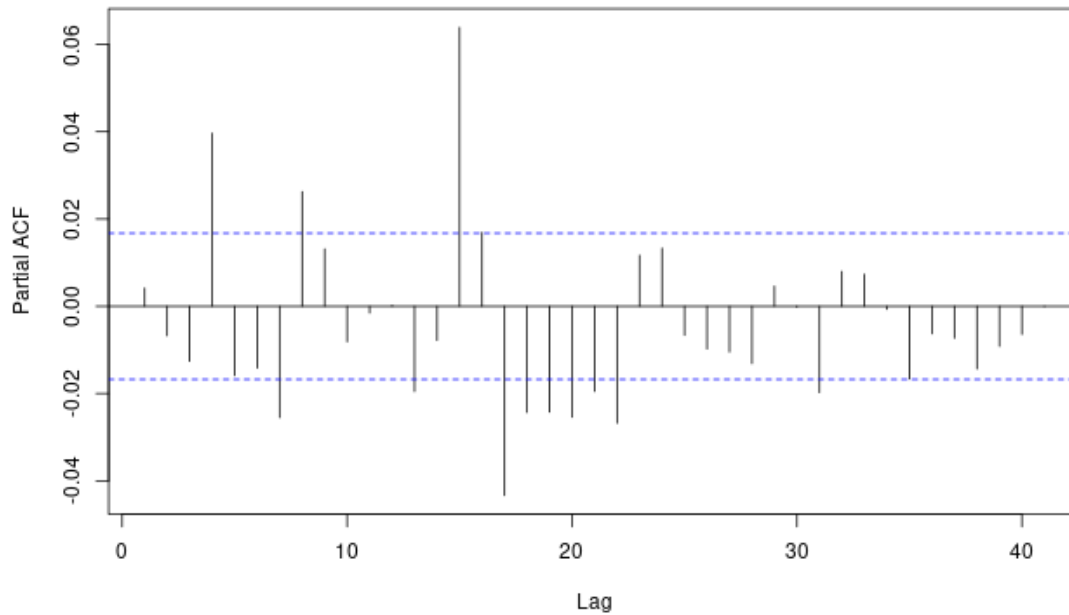

**Supplementary File S2 Figure 9: Evaluation residuals of the linear  $\Delta\text{PbtO}_2 \sim \Delta\text{rSO}_2\text{Lag1}$  models to ensure autocorrelative structure was accounted for. ACF (top) and PACF (bottom) plots of residuals of the model for Subject 9**

**Subject 10**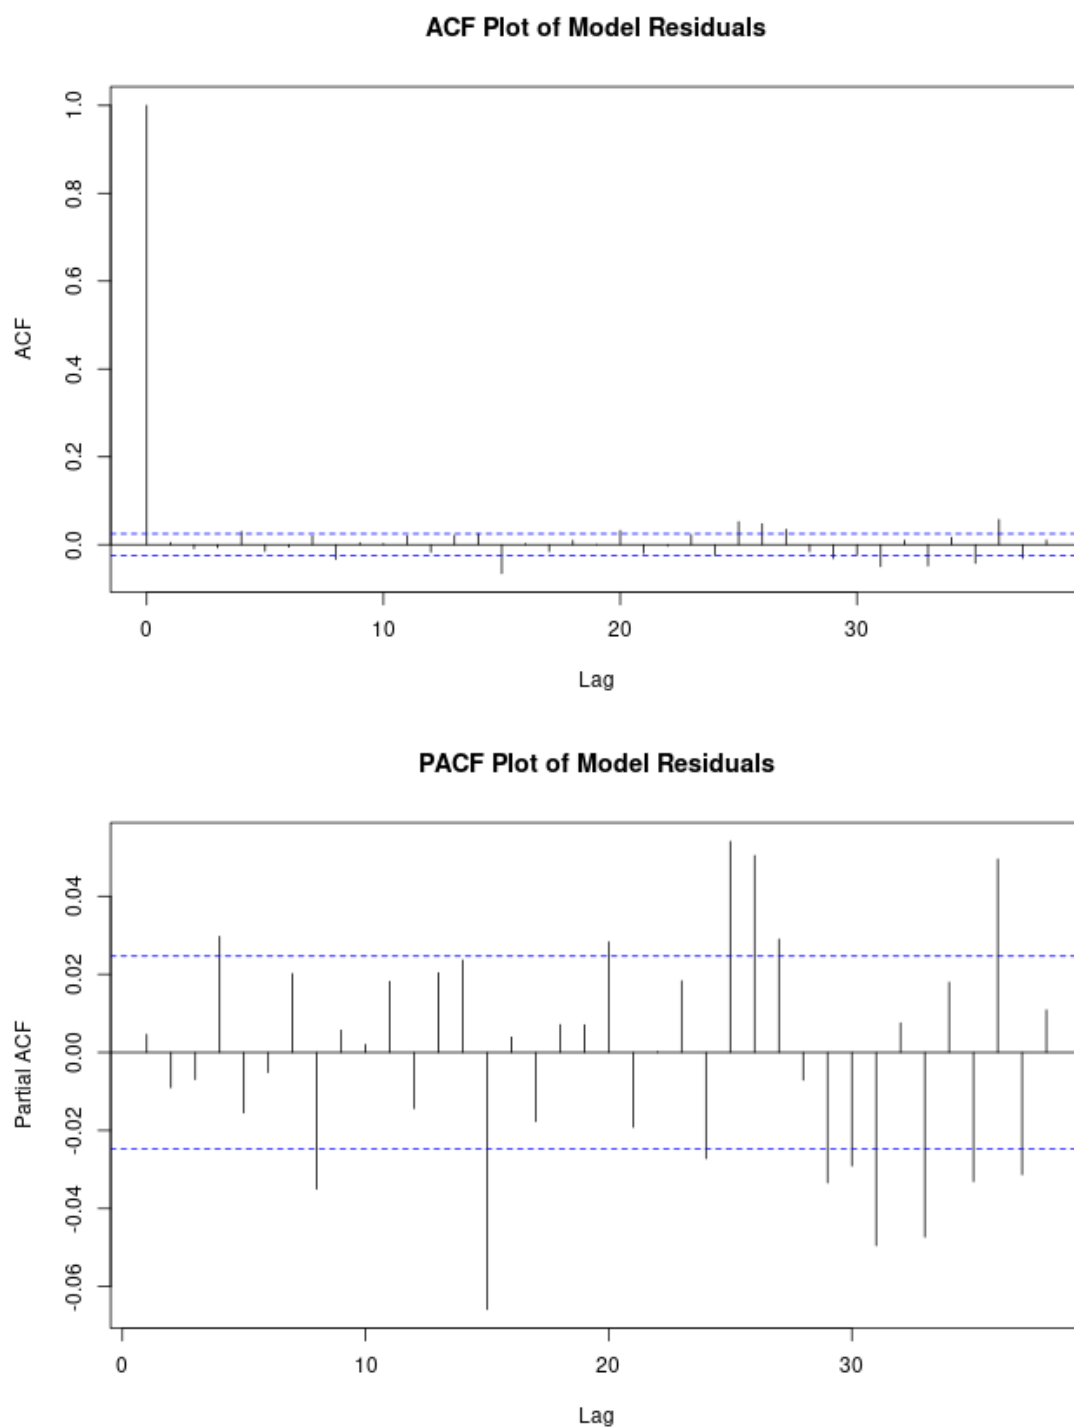

**Supplementary File S2 Figure 10: Evaluation residuals of the linear  $\Delta\text{PbtO}_2 \sim \Delta\text{rSO}_2\text{Lag1}$  models to ensure autocorrelative structure was accounted for. ACF (top) and PACF (bottom) plots of residuals of the model for Subject 10**

## Subject 11

ACF Plot of Model Residuals

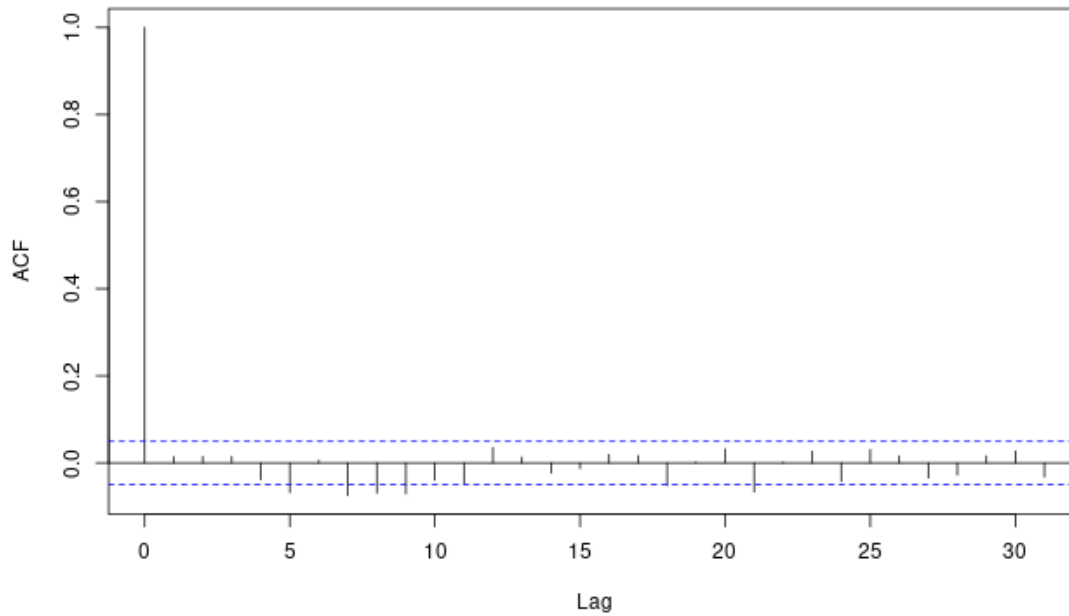

PACF Plot of Model Residuals

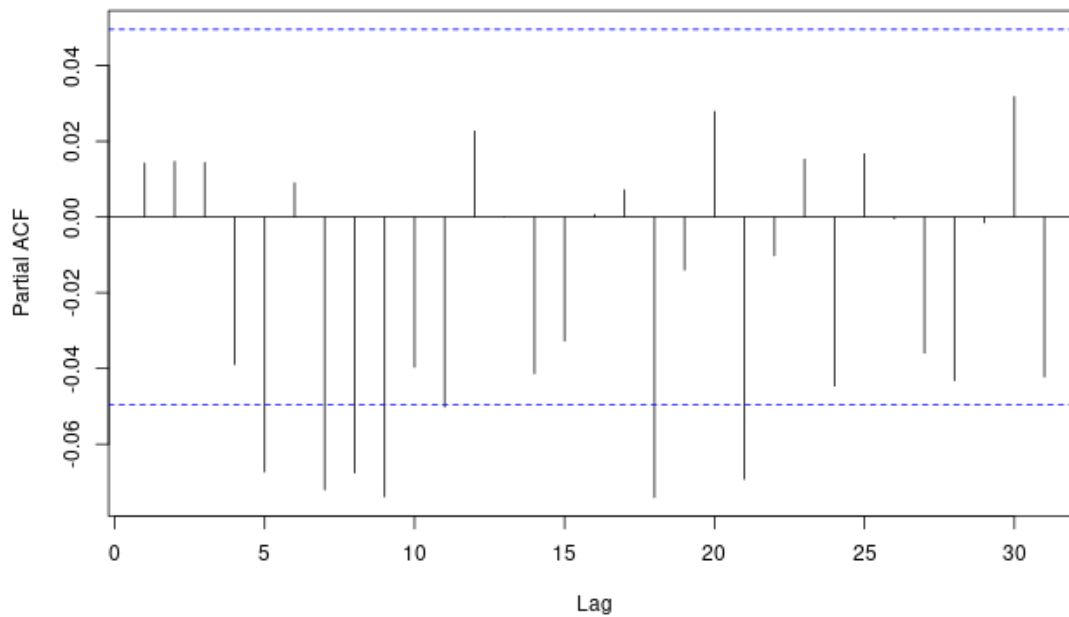

**Supplementary File S2 Figure 11: Evaluation residuals of the linear  $\Delta\text{PbtO}_2 \sim \Delta\text{rSO}_2\text{Lag1}$  models to ensure autocorrelative structure was accounted for. ACF (top) and PACF (bottom) plots of residuals of the model for Subject 11**

**Subject 12**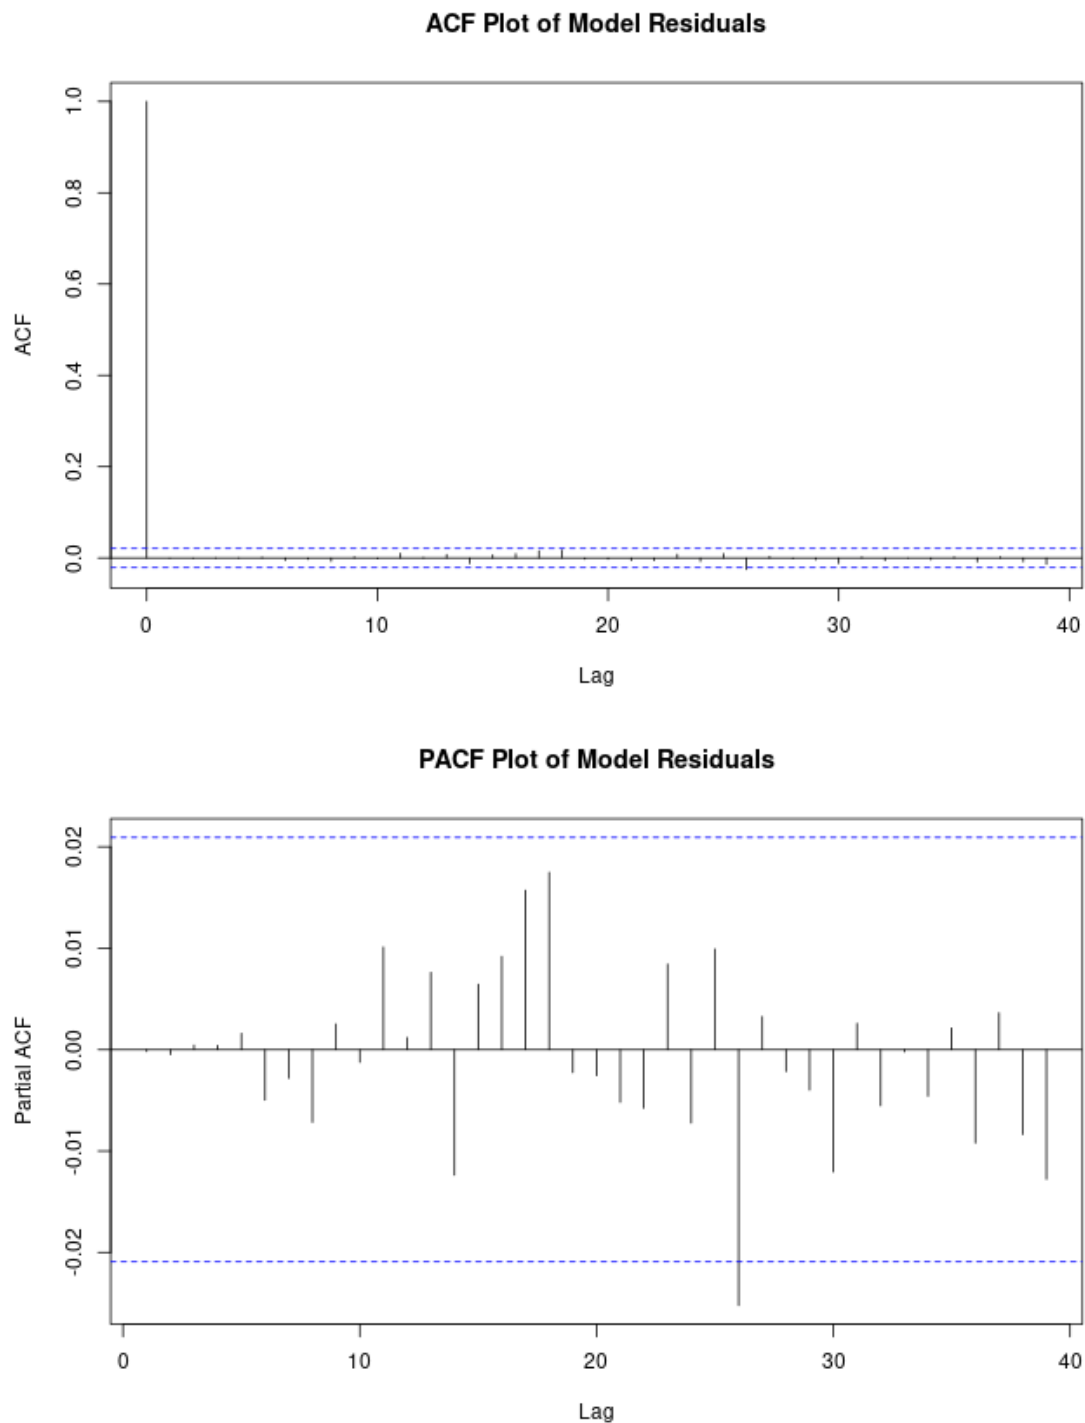

**Supplementary File S2 Figure 12: Evaluation residuals of the linear  $\Delta\text{PbtO}_2 \sim \Delta\text{rSO}_2\text{Lag1}$  models to ensure autocorrelative structure was accounted for. ACF (top) and PACF (bottom) plots of residuals of the model for Subject 12**

## Subject 13

ACF Plot of Model Residuals

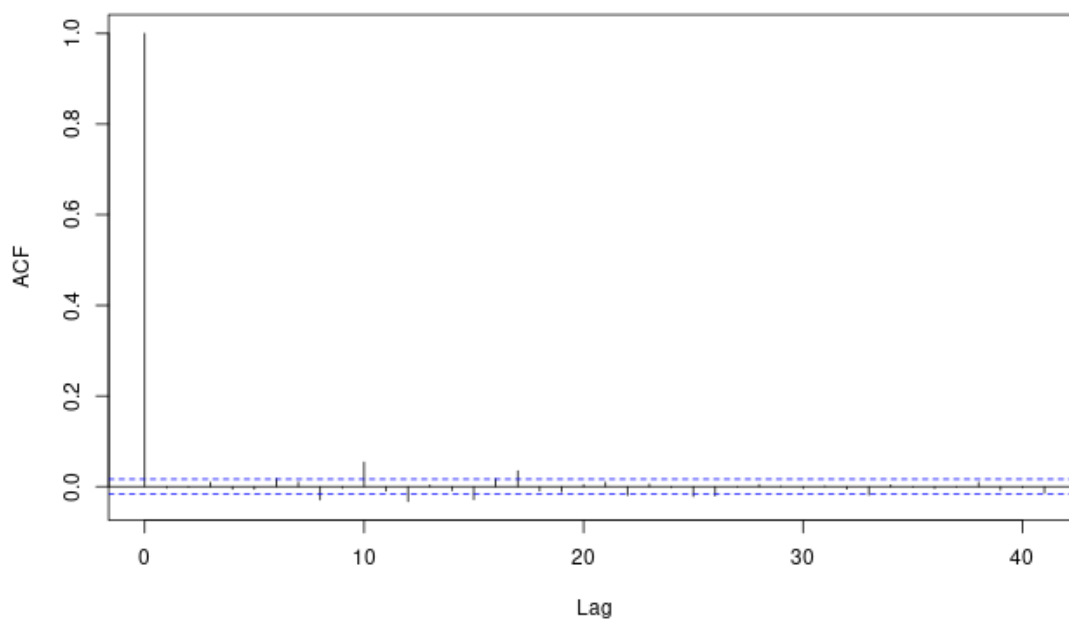

PACF Plot of Model Residuals

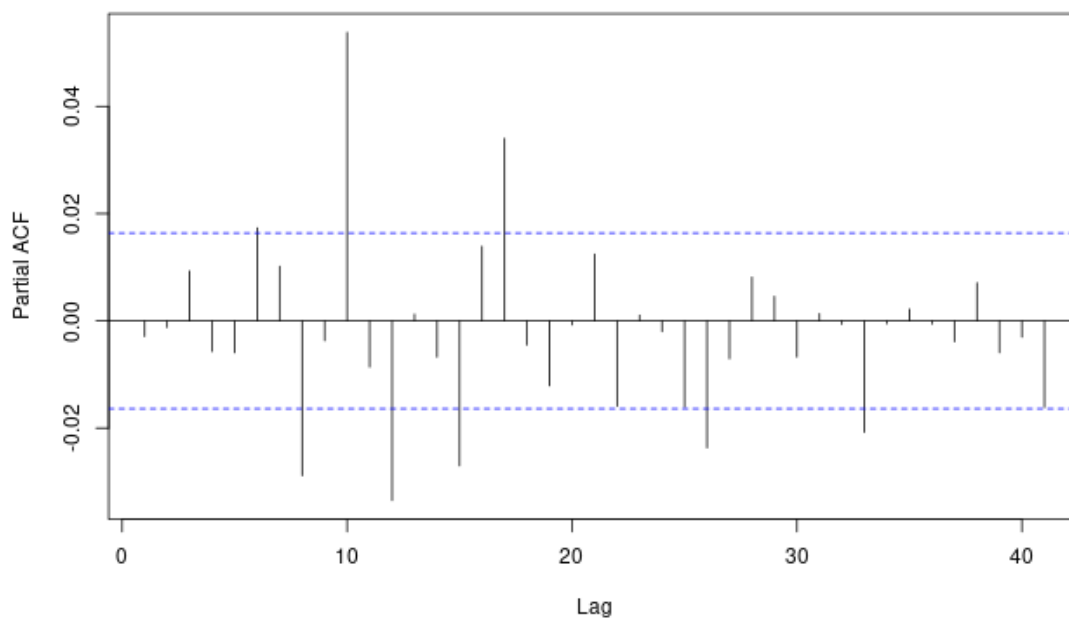

**Supplementary File S2 Figure 13: Evaluation residuals of the linear  $\Delta\text{PbtO}_2 \sim \Delta\text{rSO}_2\text{Lag1}$  models to ensure autocorrelative structure was accounted for. ACF (top) and PACF (bottom) plots of residuals of the model for Subject 13**

**Subject 14**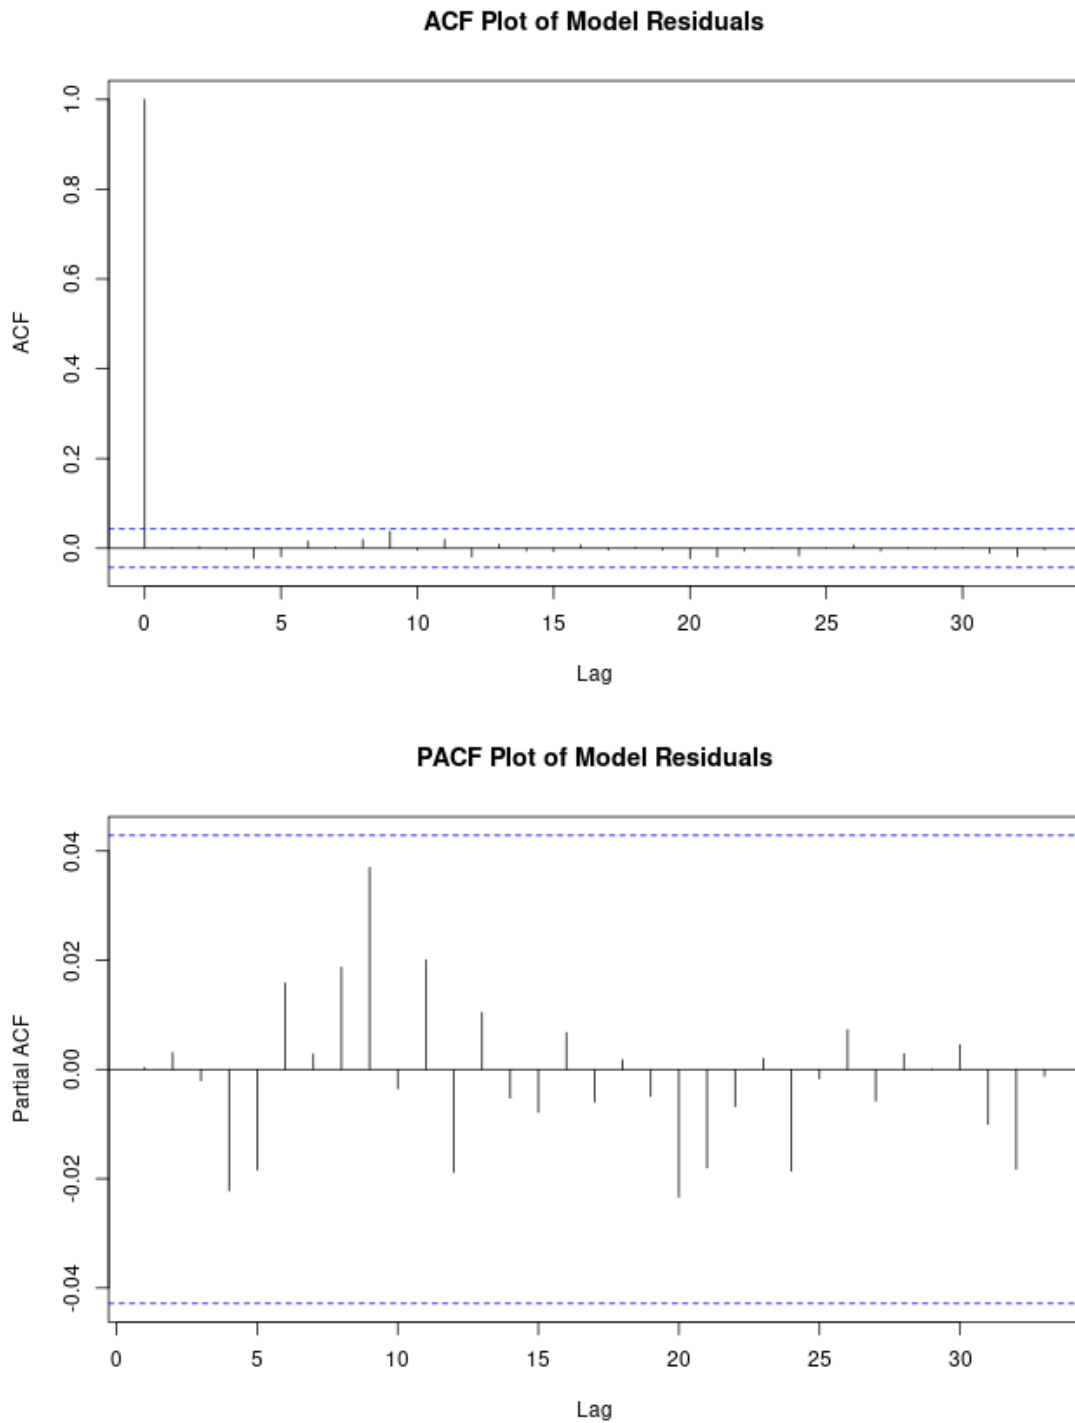

**Supplementary File S2 Figure 14: Evaluation residuals of the linear  $\Delta\text{PbtO}_2 \sim \Delta\text{rSO}_2\text{Lag1}$  models to ensure autocorrelative structure was accounted for. ACF (top) and PACF (bottom) plots of residuals of the model for Subject 14**



## Subject 15

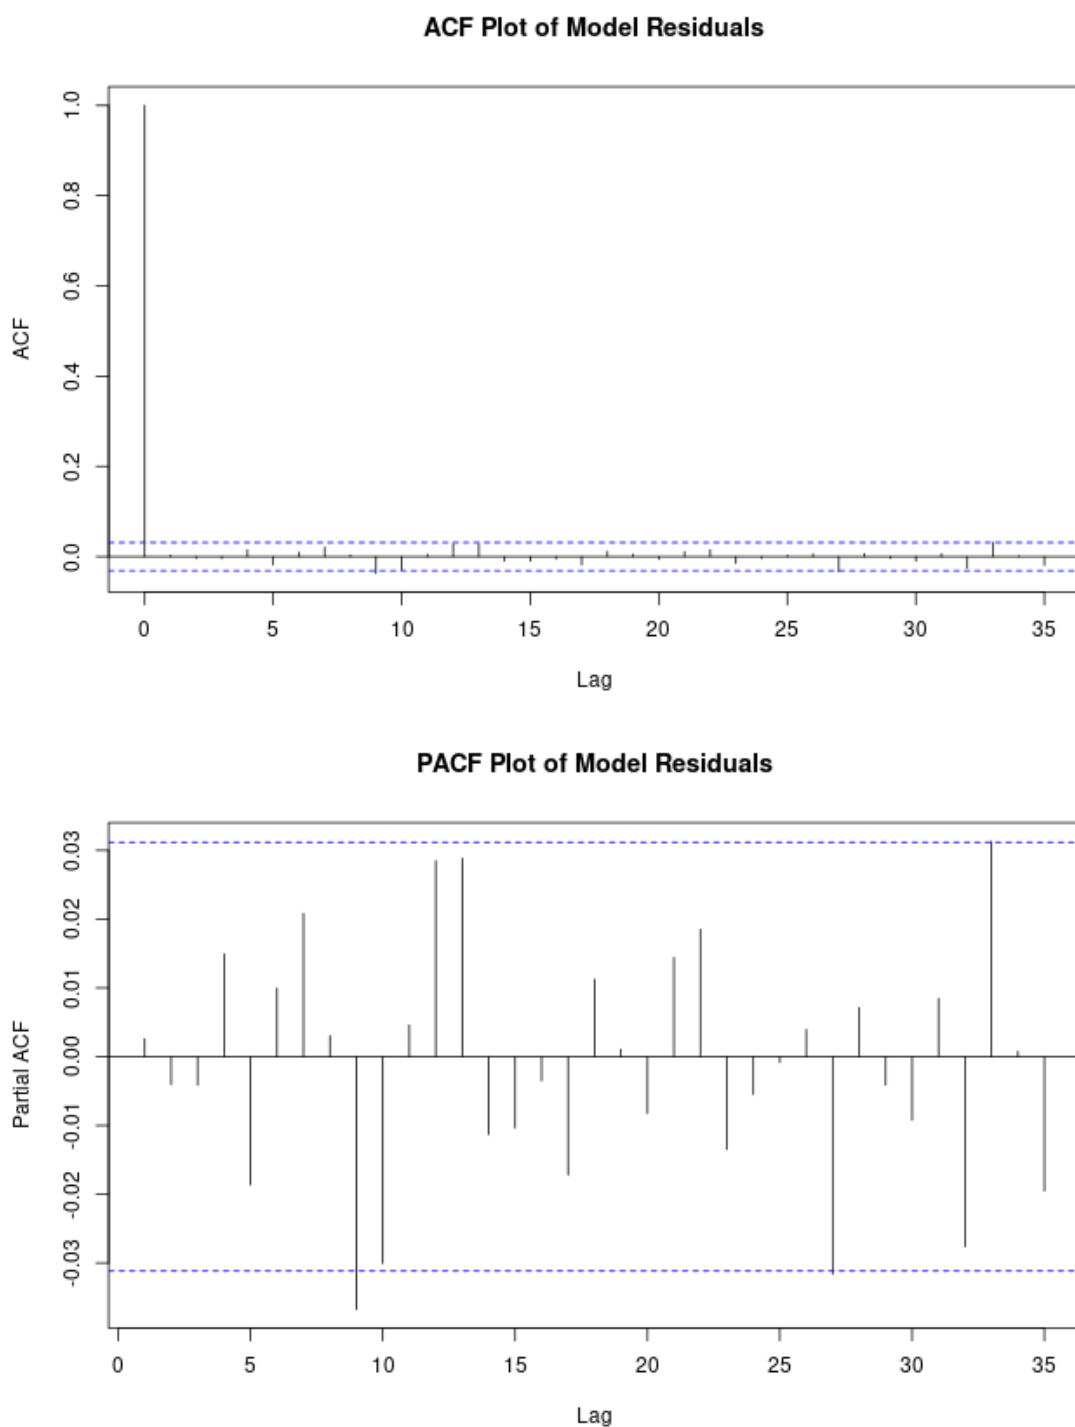

**Supplementary File S2 Figure 15: Evaluation residuals of the linear  $\Delta\text{PbtO}_2 \sim \Delta\text{rSO}_2\text{Lag1}$  models to ensure autocorrelative structure was accounted for. ACF (top) and PACF (bottom) plots of residuals of the model for Subject 15**

**Subject 16**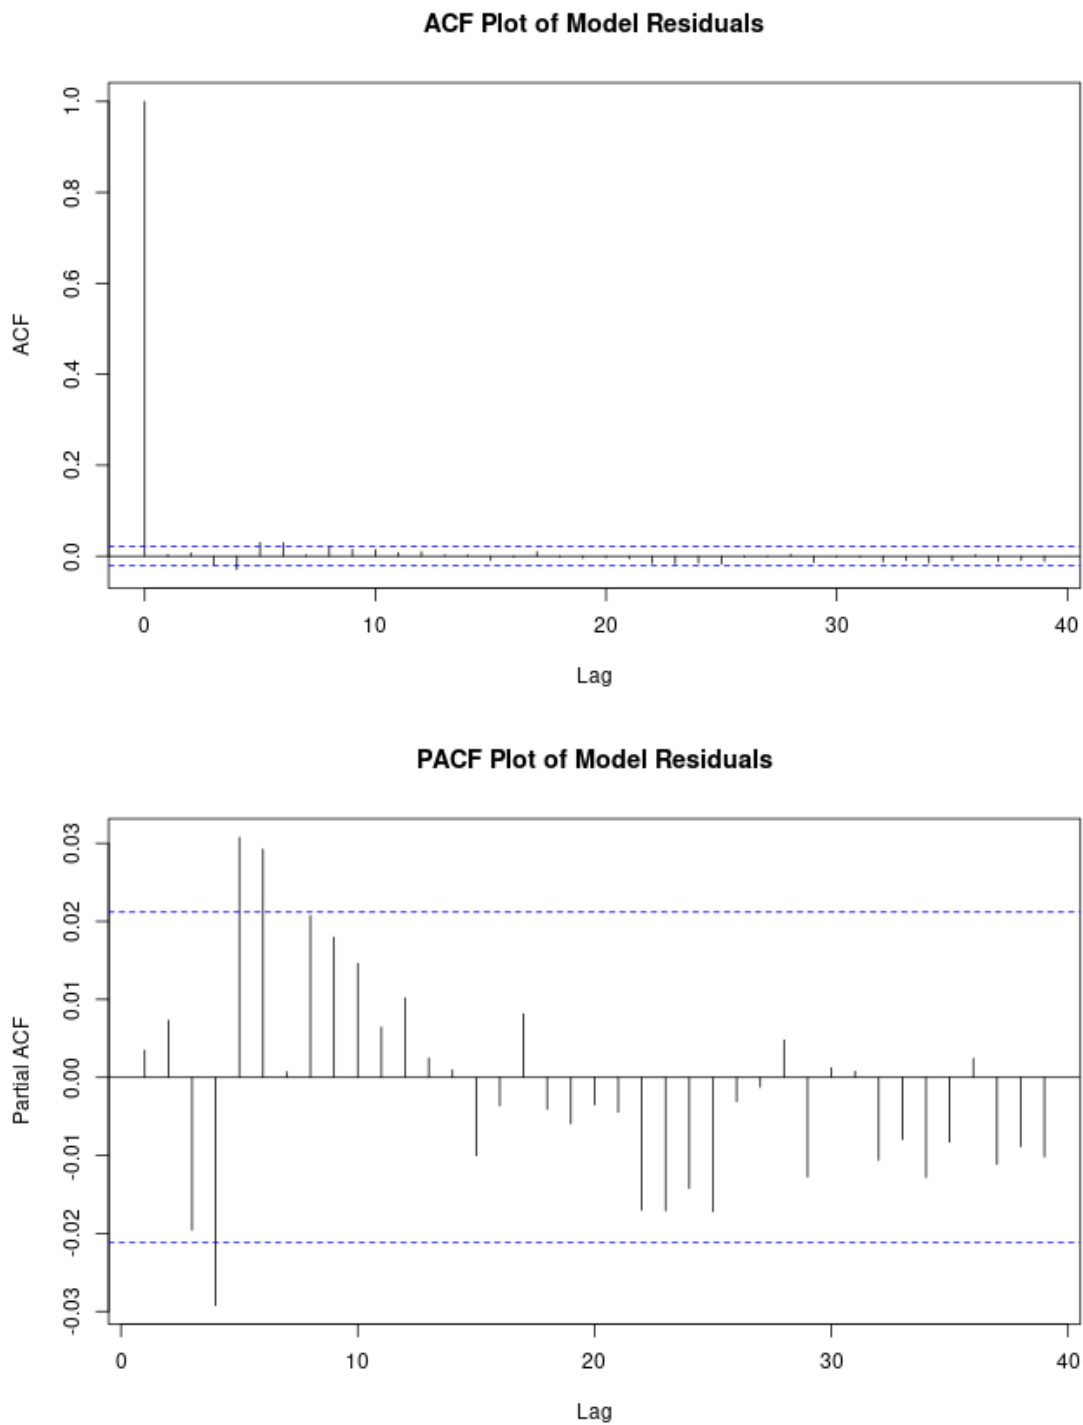

**Supplementary File S2 Figure 16: Evaluation residuals of the linear  $\Delta\text{PbtO}_2 \sim \Delta\text{rSO}_2\text{Lag1}$  models to ensure autocorrelative structure was accounted for. ACF (top) and PACF (bottom) plots of residuals of the model for Subject 16**

## Subject 17

ACF Plot of Model Residuals

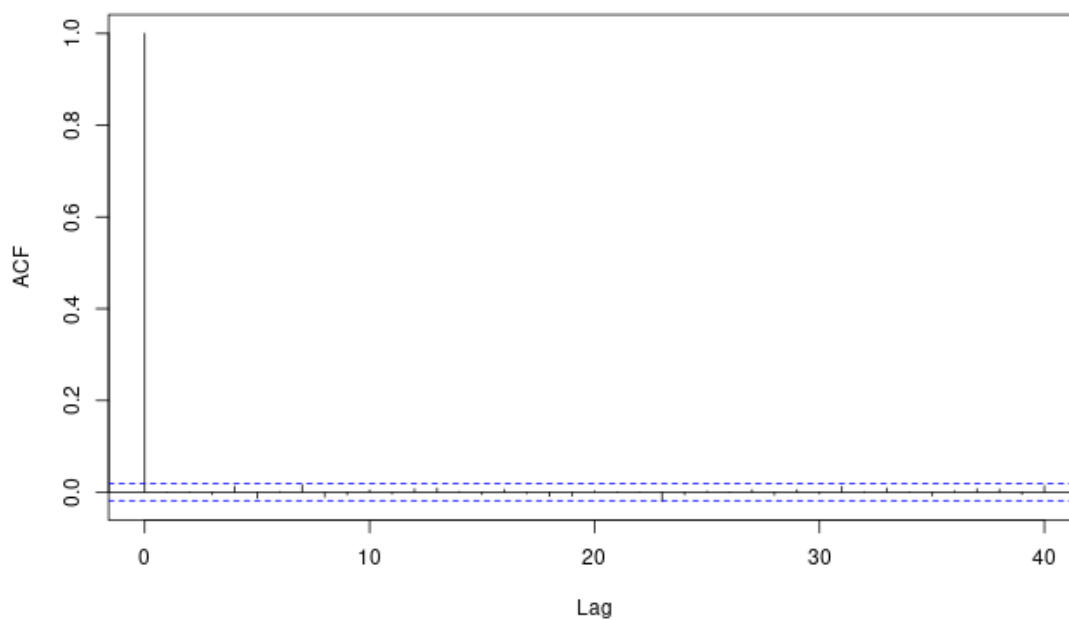

PACF Plot of Model Residuals

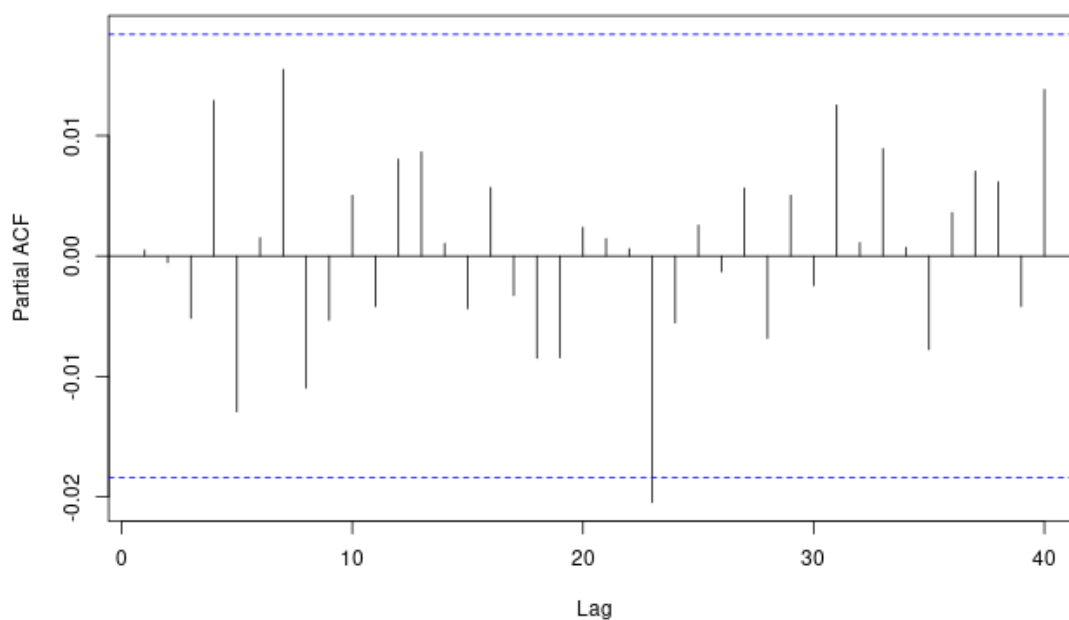

**Supplementary File S2 Figure 17: Evaluation residuals of the linear  $\Delta\text{PbtO}_2 \sim \Delta\text{rSO}_2\text{Lag1}$  models to ensure autocorrelative structure was accounted for. ACF (top) and PACF (bottom) plots of residuals of the model for Subject 17**

## Subject 18

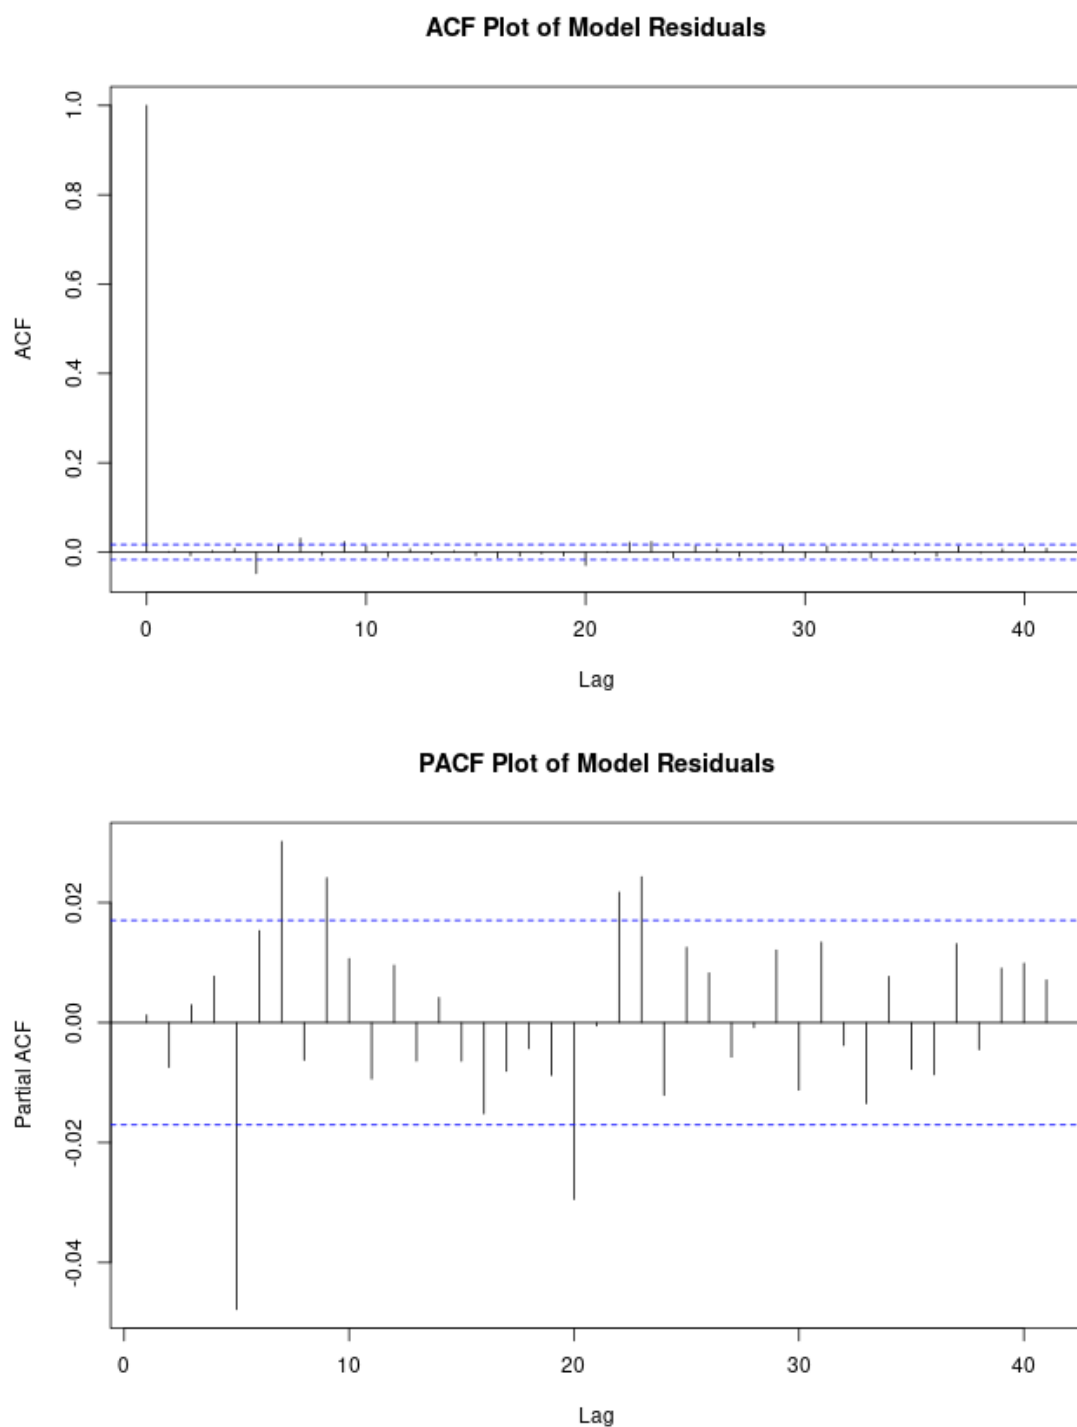

**Supplementary File S2 Figure 18: Evaluation residuals of the linear  $\Delta\text{PbtO}_2 \sim \Delta\text{rSO}_2\text{Lag1}$  models to ensure autocorrelative structure was accounted for. ACF (top) and PACF (bottom) plots of residuals of the model for Subject 18**

## Subject 19

ACF Plot of Model Residuals

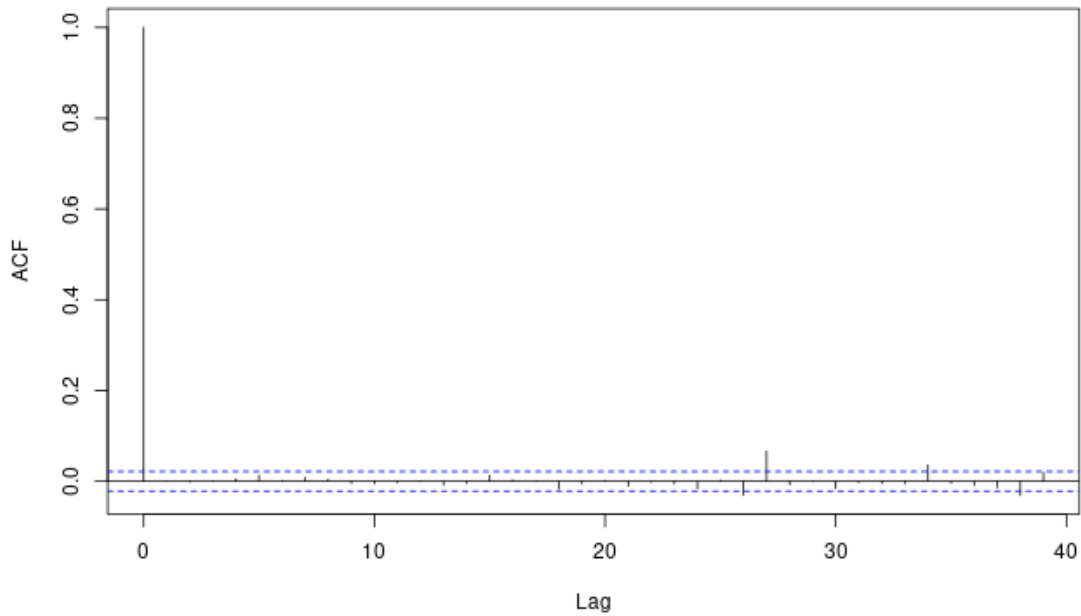

PACF Plot of Model Residuals

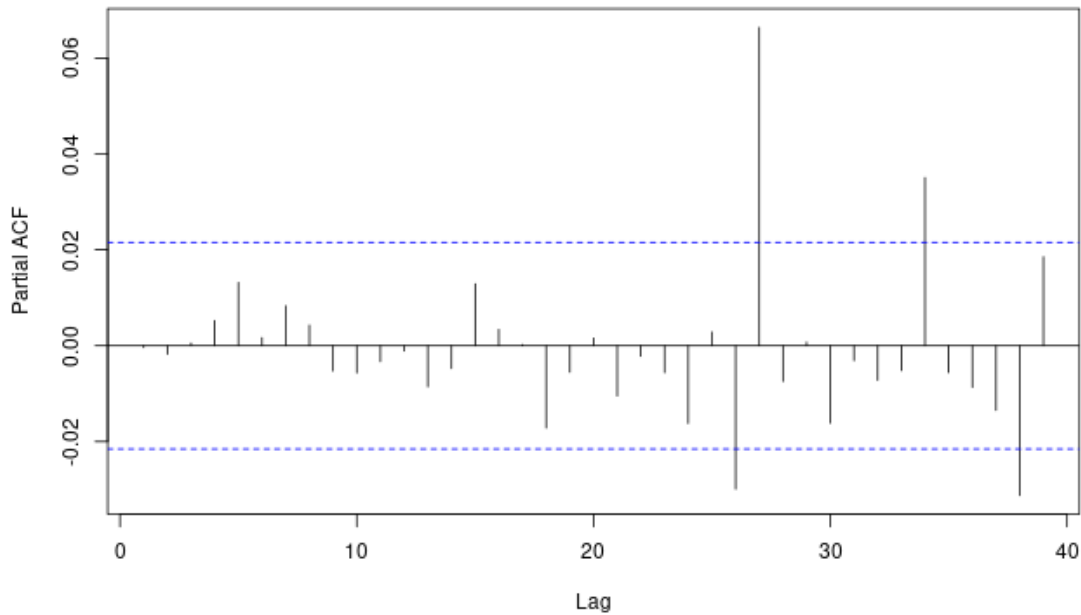

**Supplementary File S2 Figure 19: Evaluation residuals of the linear  $\Delta\text{PbtO}_2 \sim \Delta\text{rSO}_2\text{Lag1}$  models to ensure autocorrelative structure was accounted for. ACF (top) and PACF (bottom) plots of residuals of the model for Subject 19**

## Subject 20

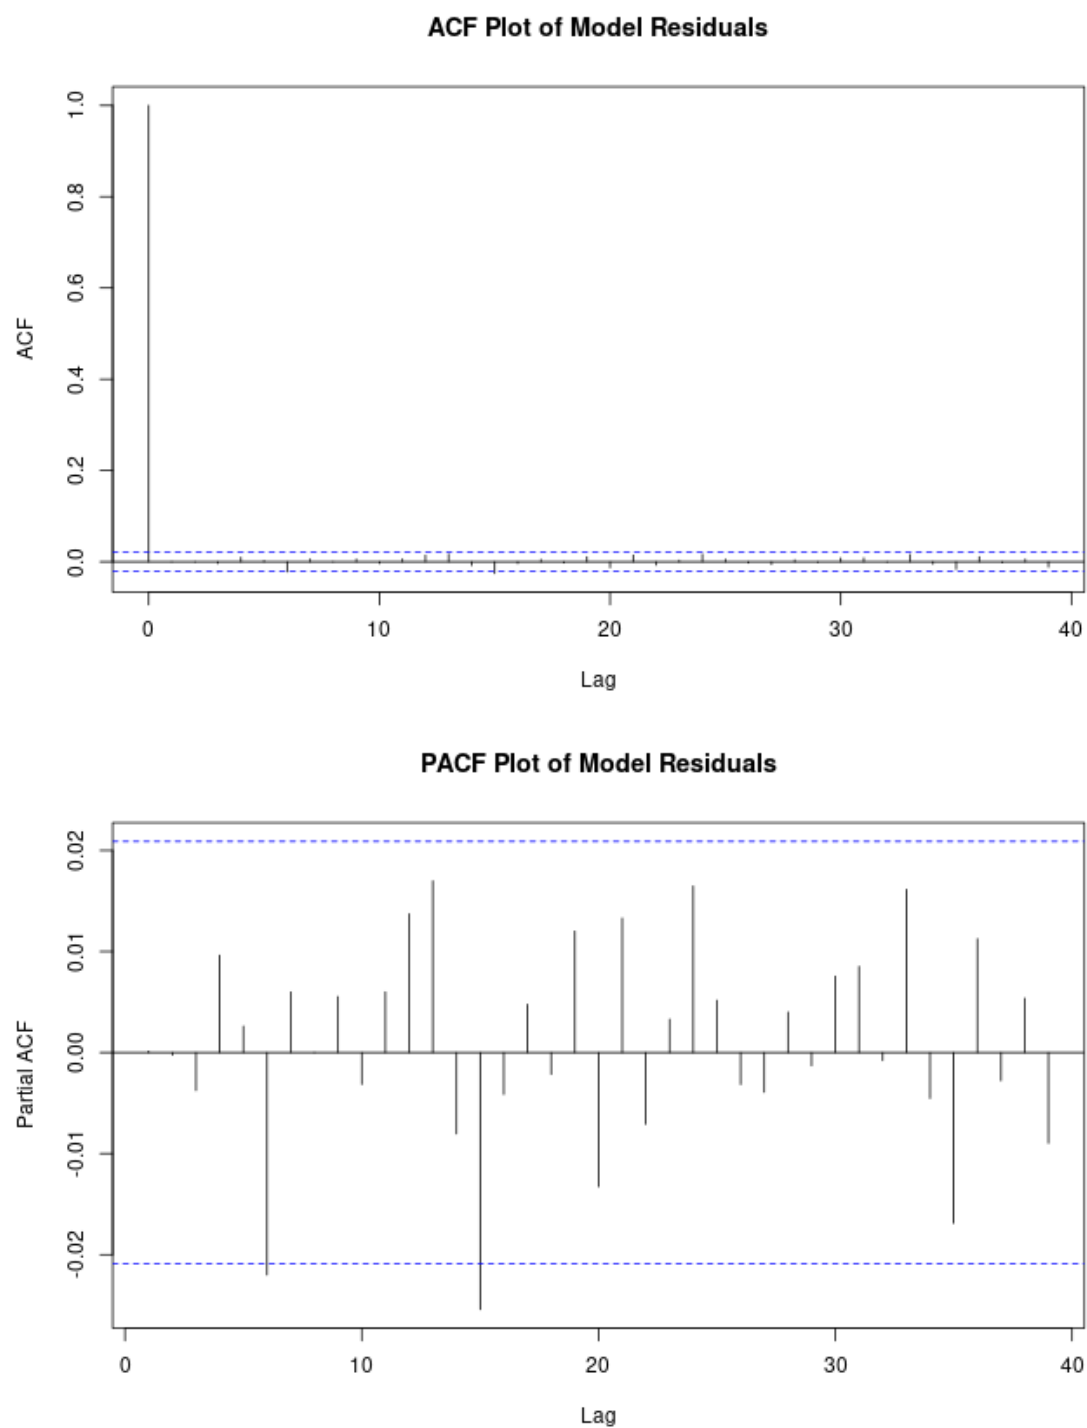

**Supplementary File S2 Figure 20: Evaluation residuals of the linear  $\Delta\text{PbtO}_2 \sim \Delta\text{rSO}_2\text{Lag1}$  models to ensure autocorrelative structure was accounted for. ACF (top) and PACF (bottom) plots of residuals of the model for Subject 20**

**3    Supplementary File S3: Scatter plots of actual vs predicted values of  $\Delta PbtO_2$  for each subject**

**Plot Legend:**  $\Delta PbtO_2$  = *change in brain tissue oxygen tension.*

**Subject 1**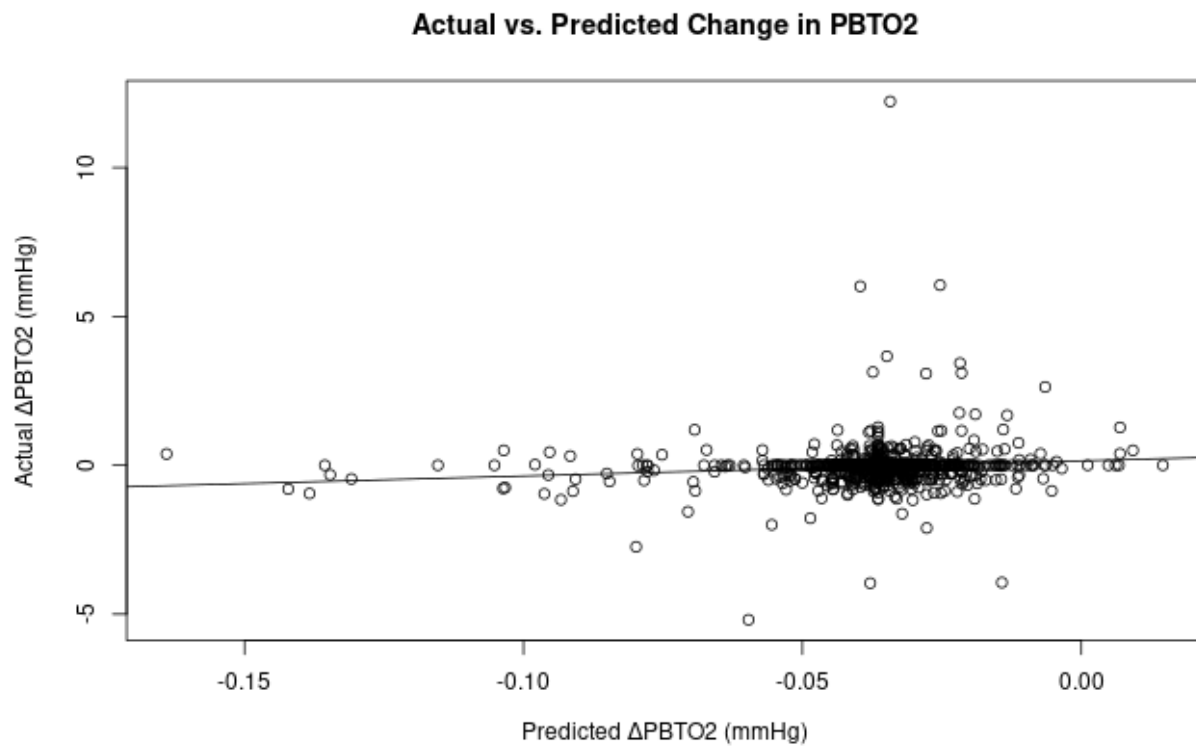

**Supplementary File S3 Figure 1: Scatter plot of actual of actual vs predicted values of  $\Delta$ PbtO2 for Subject 1.**



## Subject 2

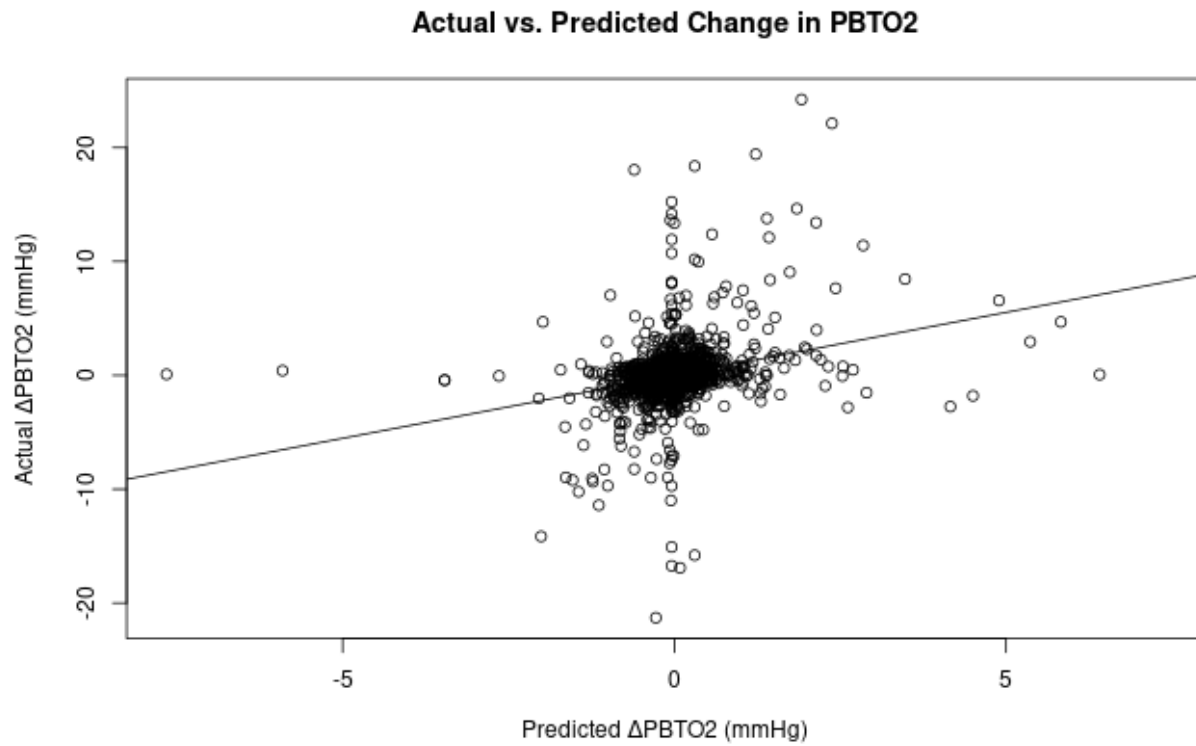

**Supplementary File S3 Figure 2: Scatter plot of actual of actual vs predicted values of  $\Delta$ PbtO2 for Subject 2.**

**Subject 3**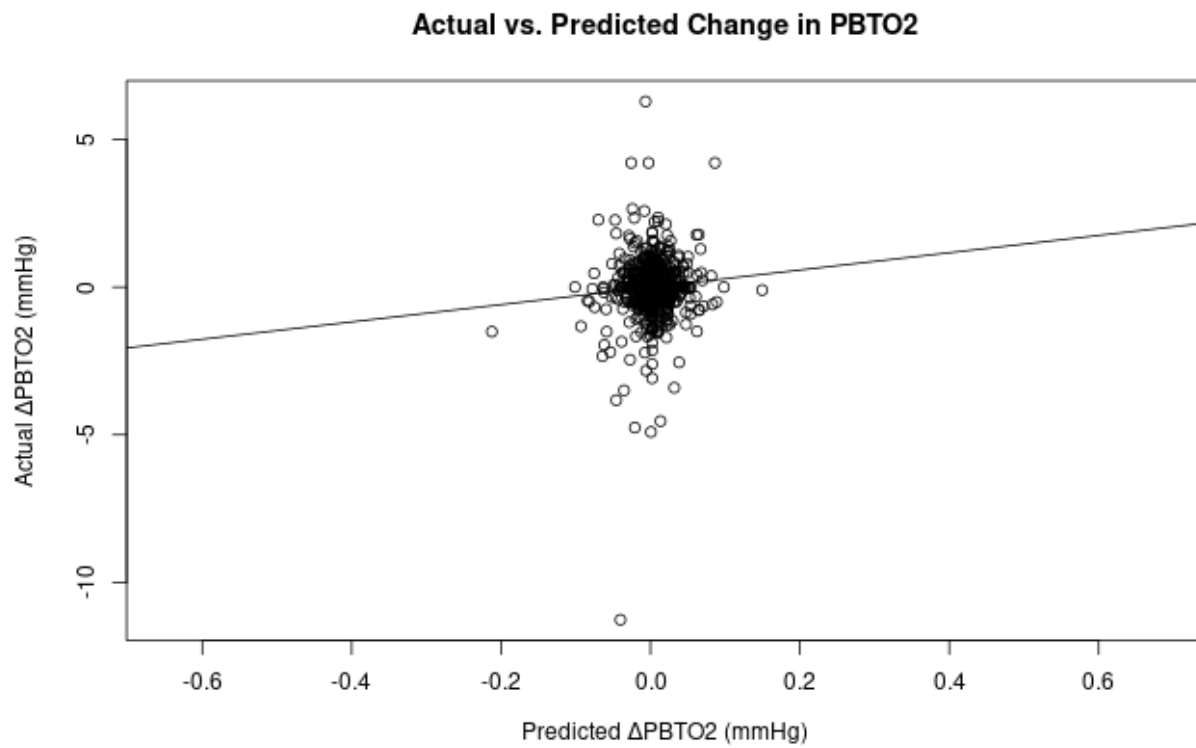

**Supplementary File S3 Figure 3: Scatter plot of actual of actual vs predicted values of  $\Delta$ PbtO2 for Subject 3.**

## Subject 4

Actual vs. Predicted Change in PBT02

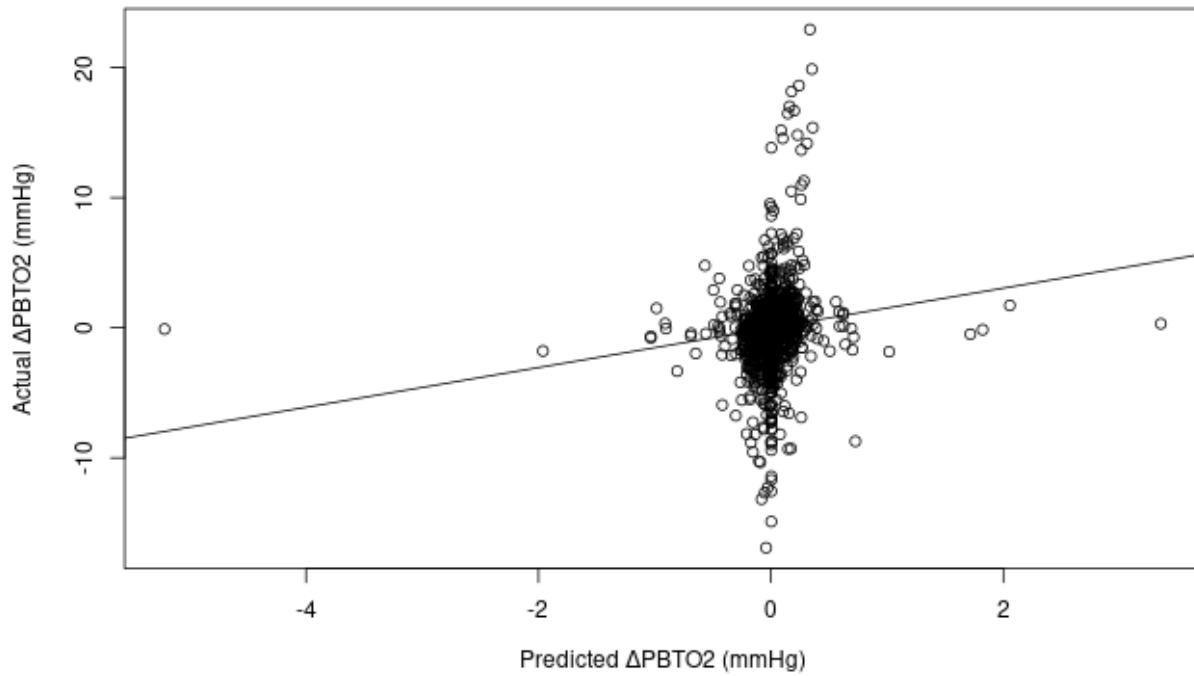

Supplementary File S3 Figure 4: Scatter plot of actual of actual vs predicted values of  $\Delta$ PbtO2 for Subject 4.

**Subject 5**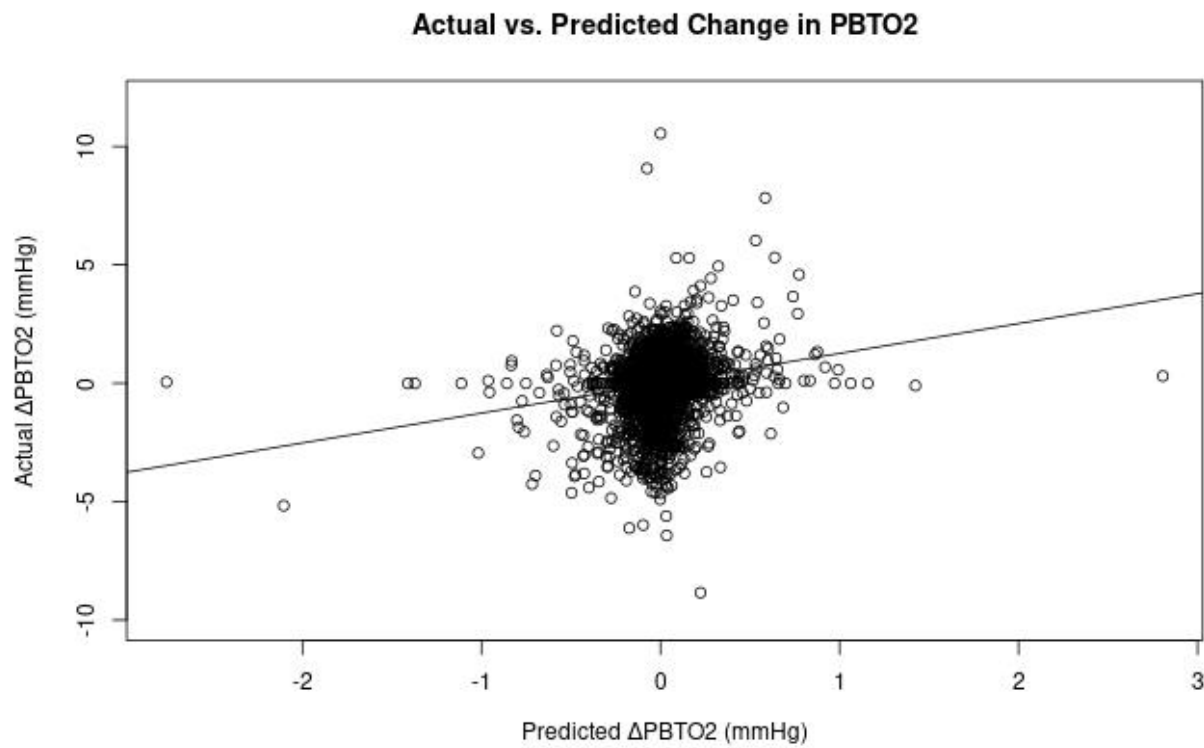

**Supplementary File S3 Figure 5: Scatter plot of actual of actual vs predicted values of  $\Delta$ PbtO2 for Subject 5.**

## Subject 6

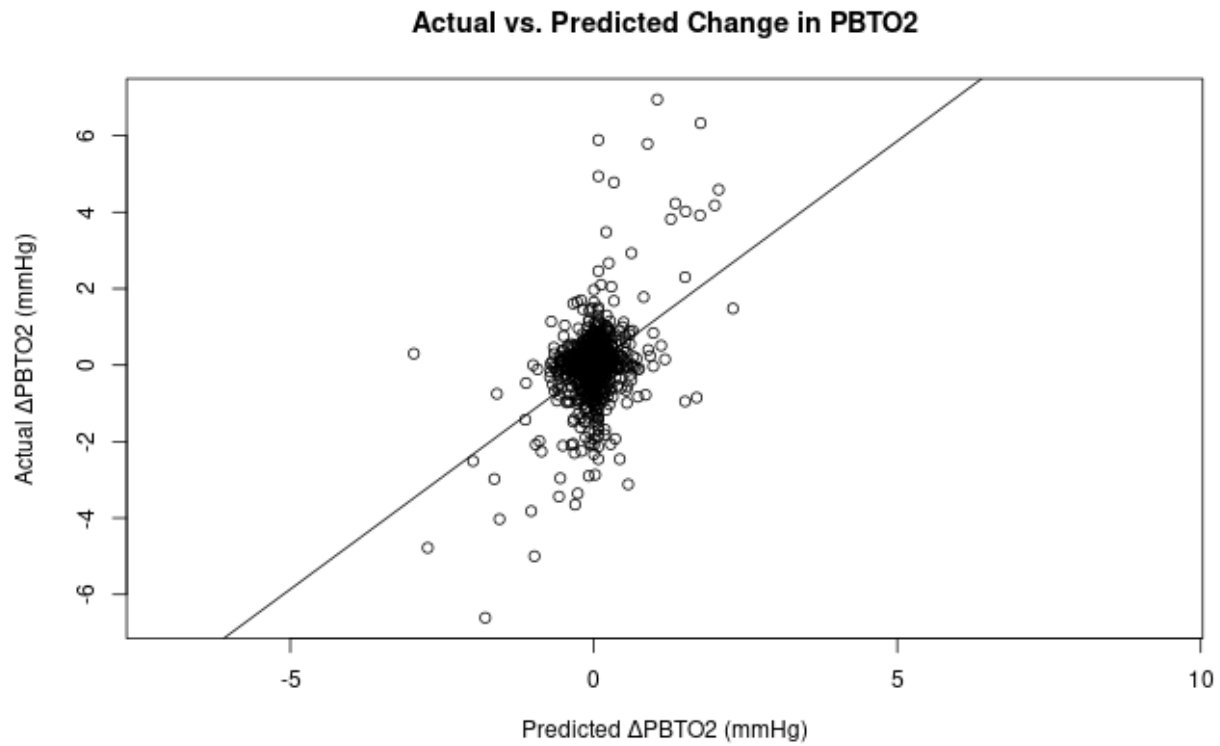

**Supplementary File S3 Figure 6: Scatter plot of actual of actual vs predicted values of  $\Delta$ PbtO2 for Subject 6.**

**Subject 7**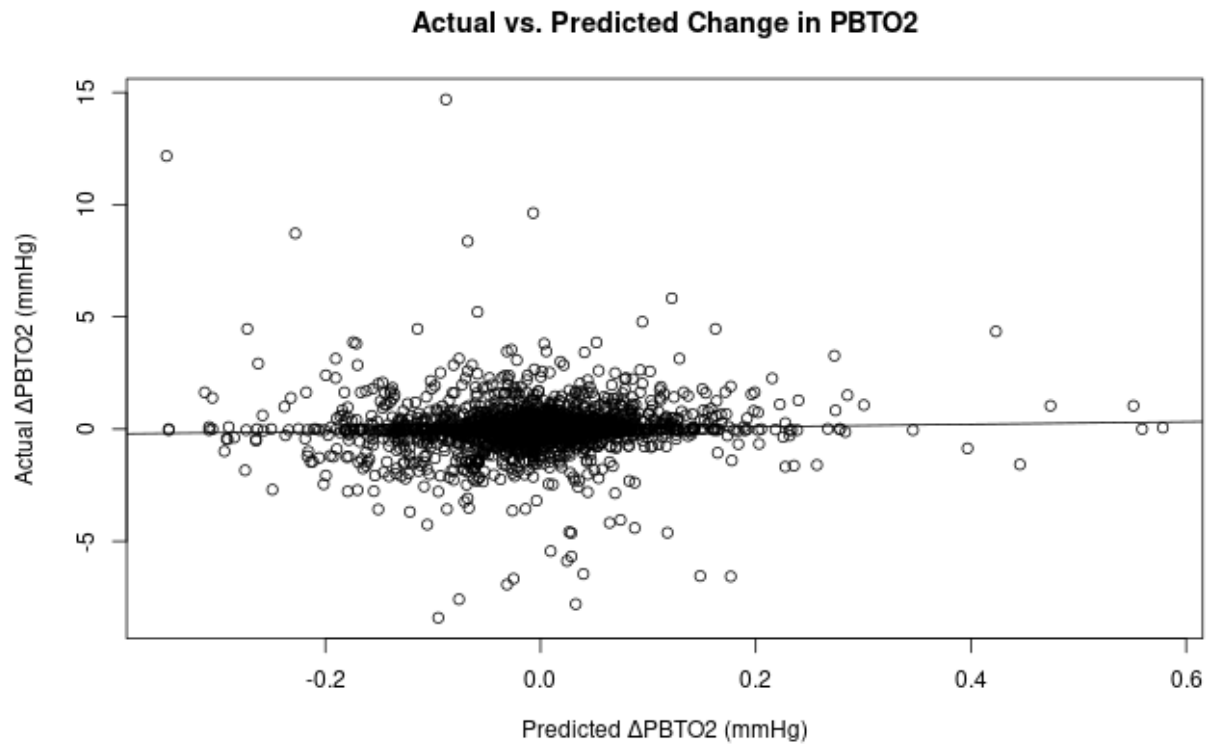

**Supplementary File S3 Figure 7: Scatter plot of actual of actual vs predicted values of  $\Delta$ PbtO2 for Subject 7.**

## Subject 8

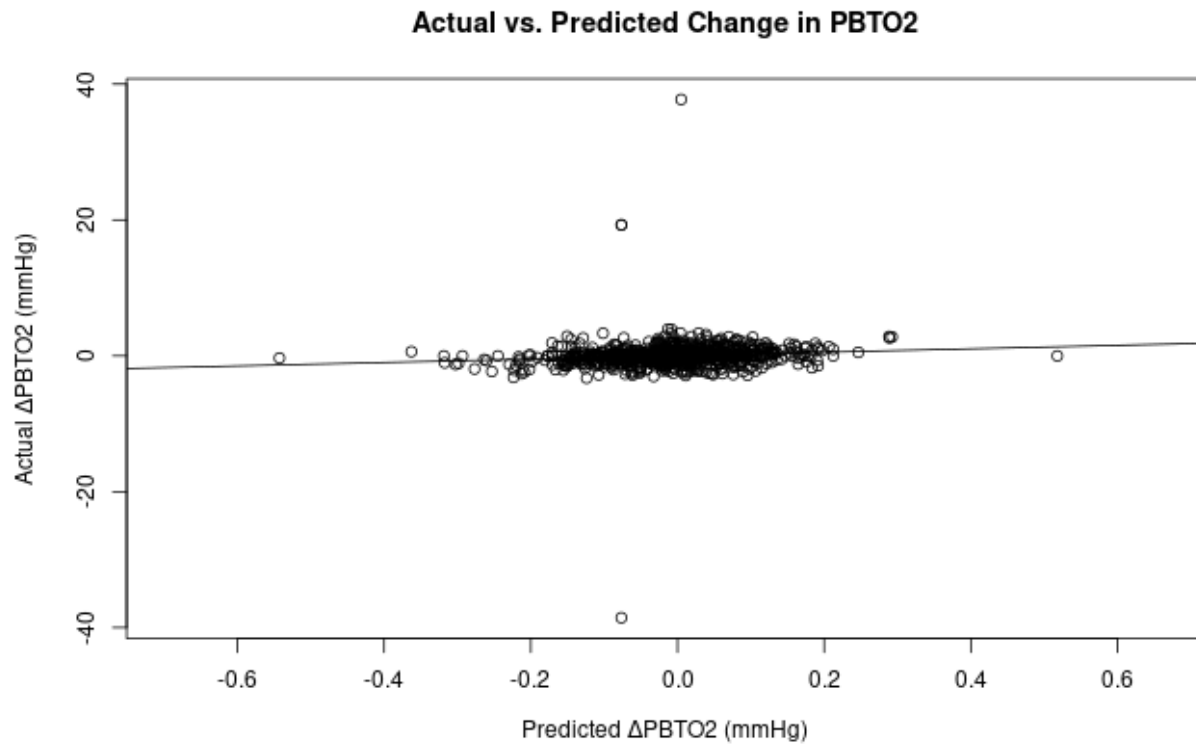

**Supplementary File S3 Figure 8: Scatter plot of actual of actual vs predicted values of  $\Delta$ PbtO2 for Subject 8.**

**Subject 9**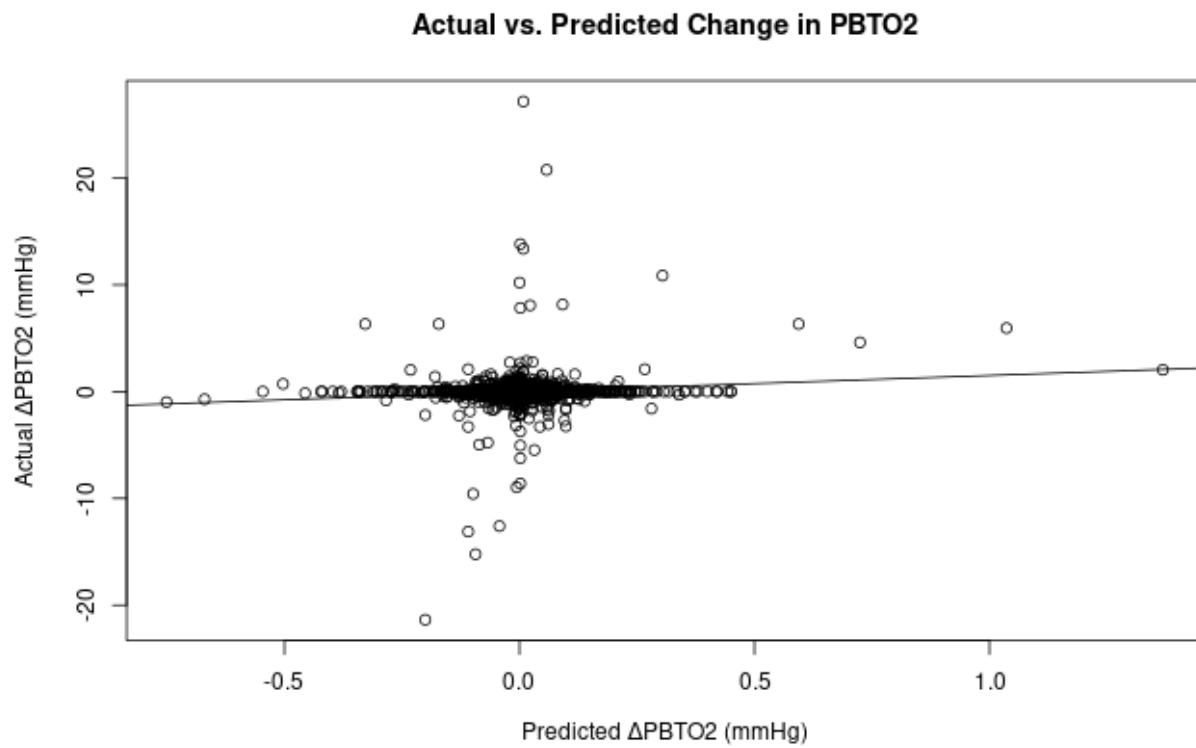

**Supplementary File S3 Figure 9: Scatter plot of actual of actual vs predicted values of  $\Delta$ PbtO2 for Subject 9.**



## Subject 10

**Actual vs. Predicted Change in PBT02**

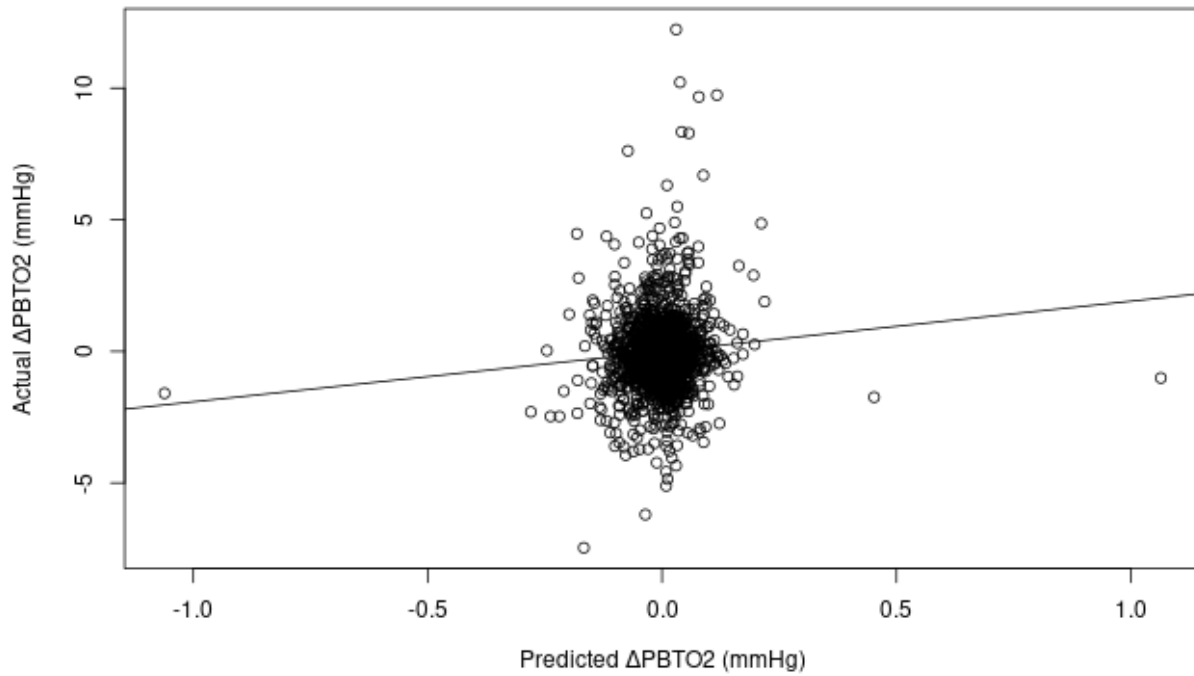

**Supplementary File S3 Figure 10: Scatter plot of actual of actual vs predicted values of  $\Delta$ PbtO2 for Subject 10.**

**Subject 11**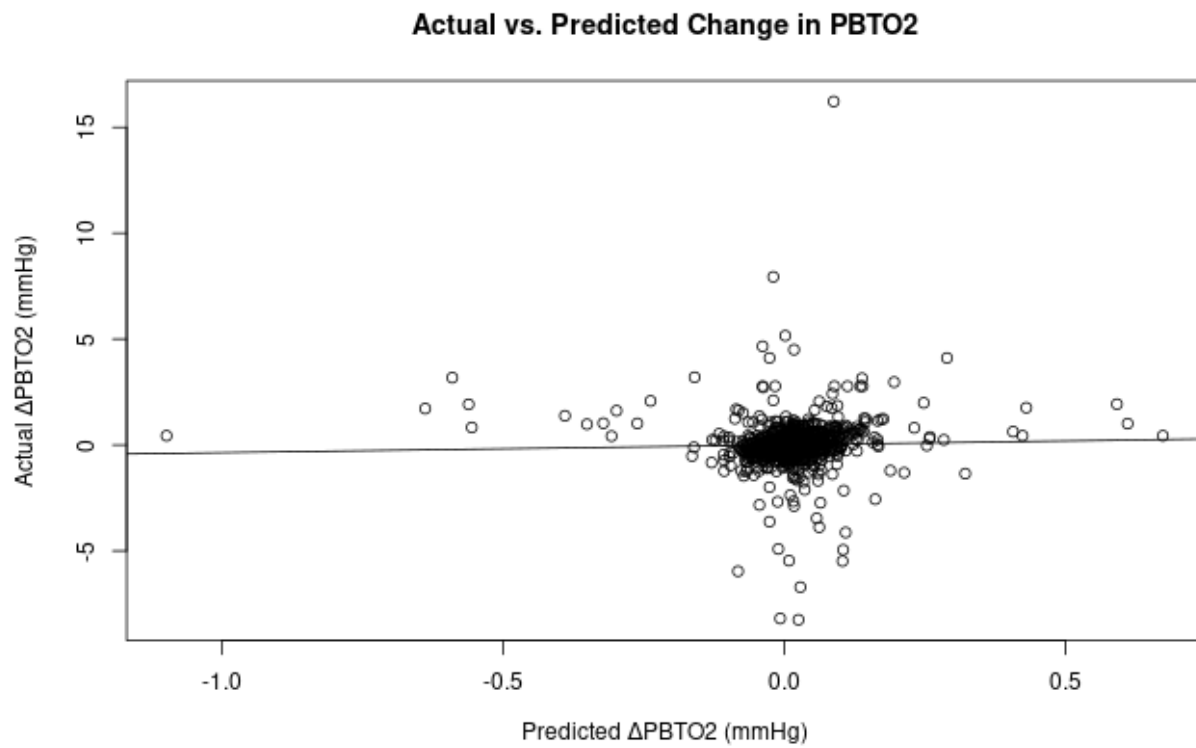

**Supplementary File S3 Figure 11: Scatter plot of actual of actual vs predicted values of  $\Delta$ PbtO2 for Subject 11.**

## Subject 12

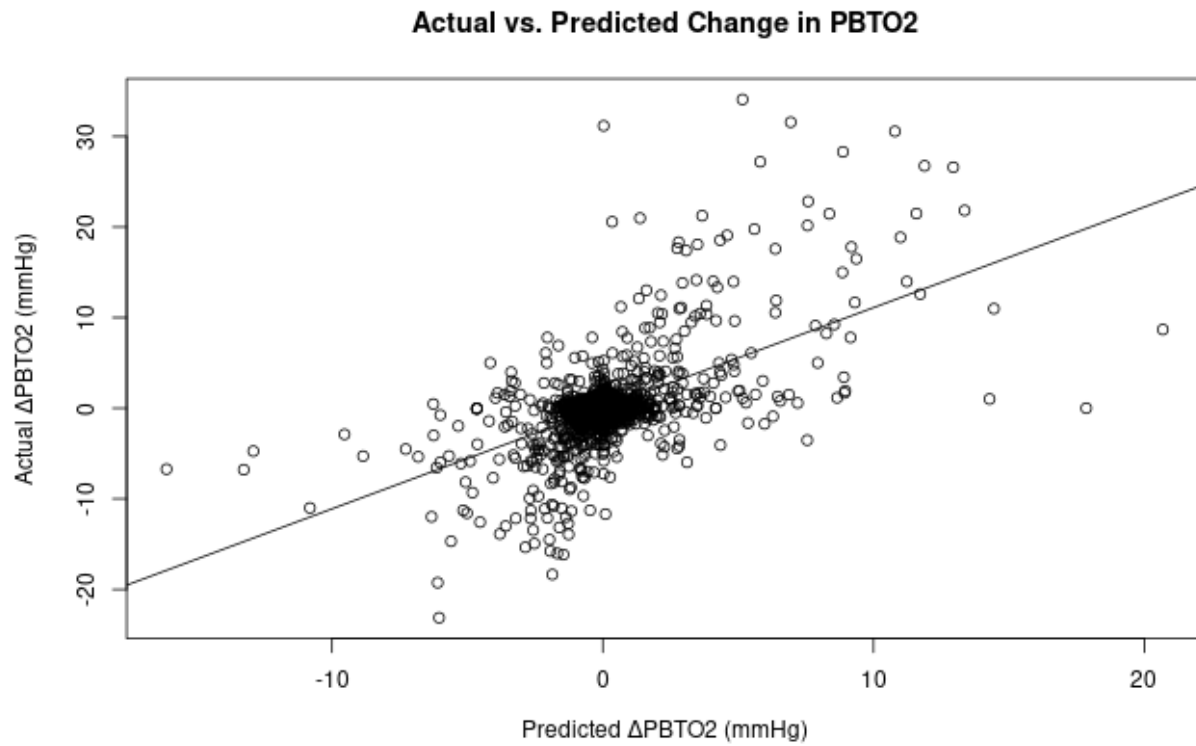

**Supplementary File S3 Figure 12: Scatter plot of actual of actual vs predicted values of  $\Delta$ PbtO2 for Subject 12.**

**Subject 13**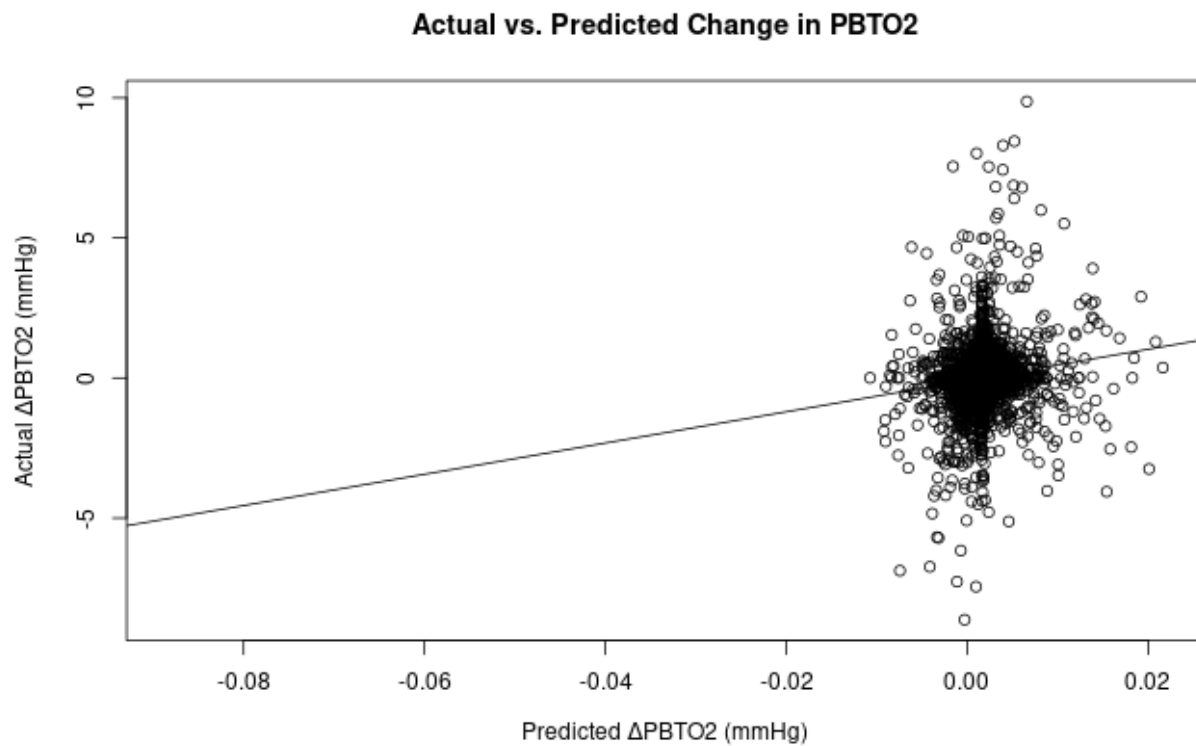

**Supplementary File S3 Figure 13: Scatter plot of actual of actual vs predicted values of  $\Delta$ PbtO2 for Subject 13.**

## Subject 14

Actual vs. Predicted Change in PBT02

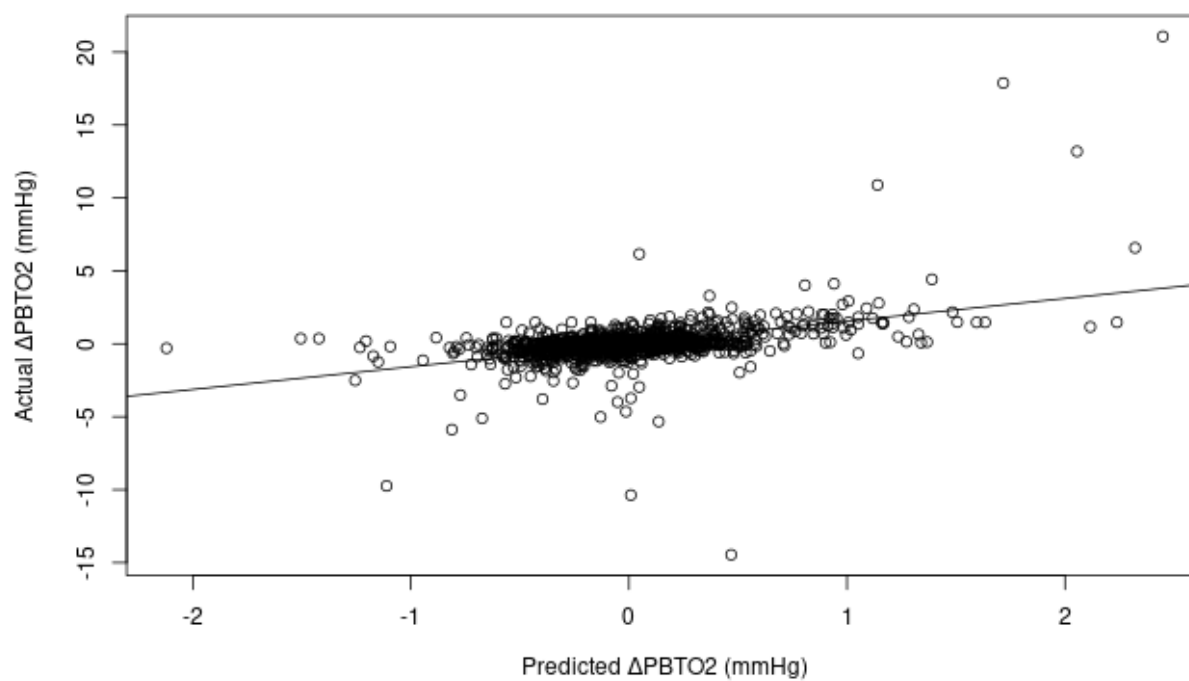

Supplementary File S3 Figure 14: Scatter plot of actual of actual vs predicted values of  $\Delta$ PbtO2 for Subject 14.

**Subject 15**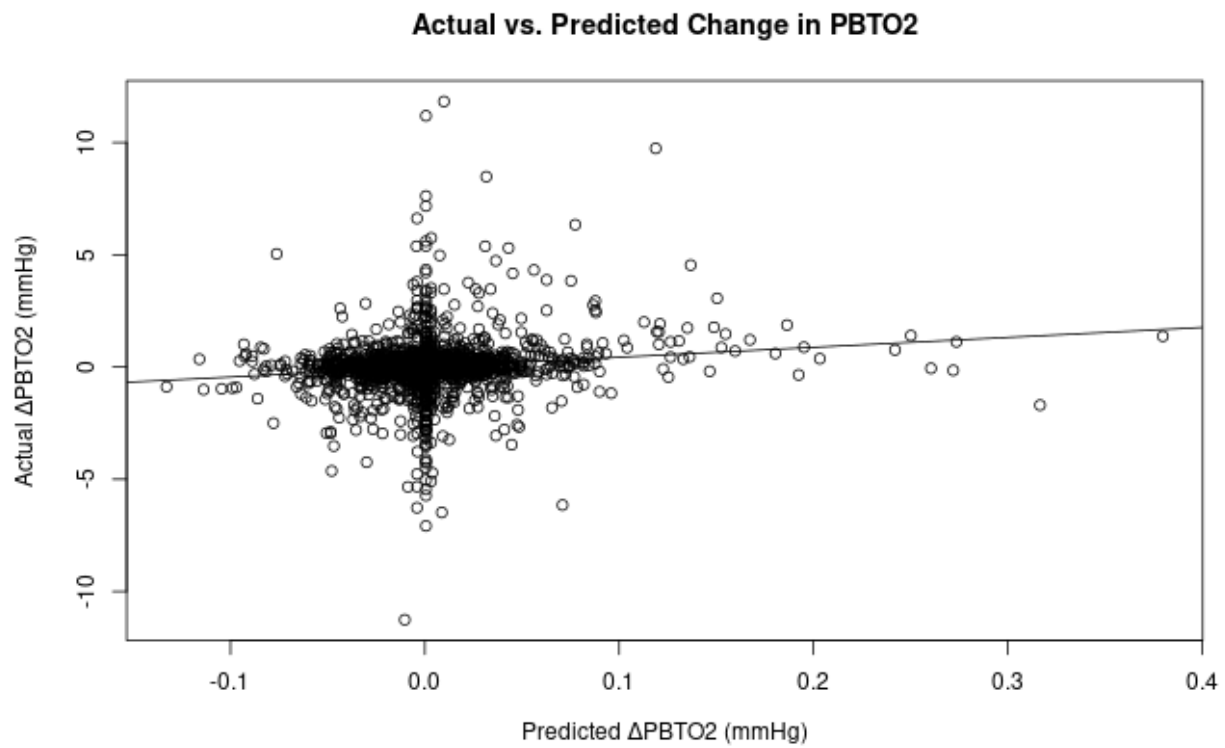

**Supplementary File S3 Figure 15: Scatter plot of actual of actual vs predicted values of  $\Delta$ PbtO2 for Subject 15.**

## Subject 16

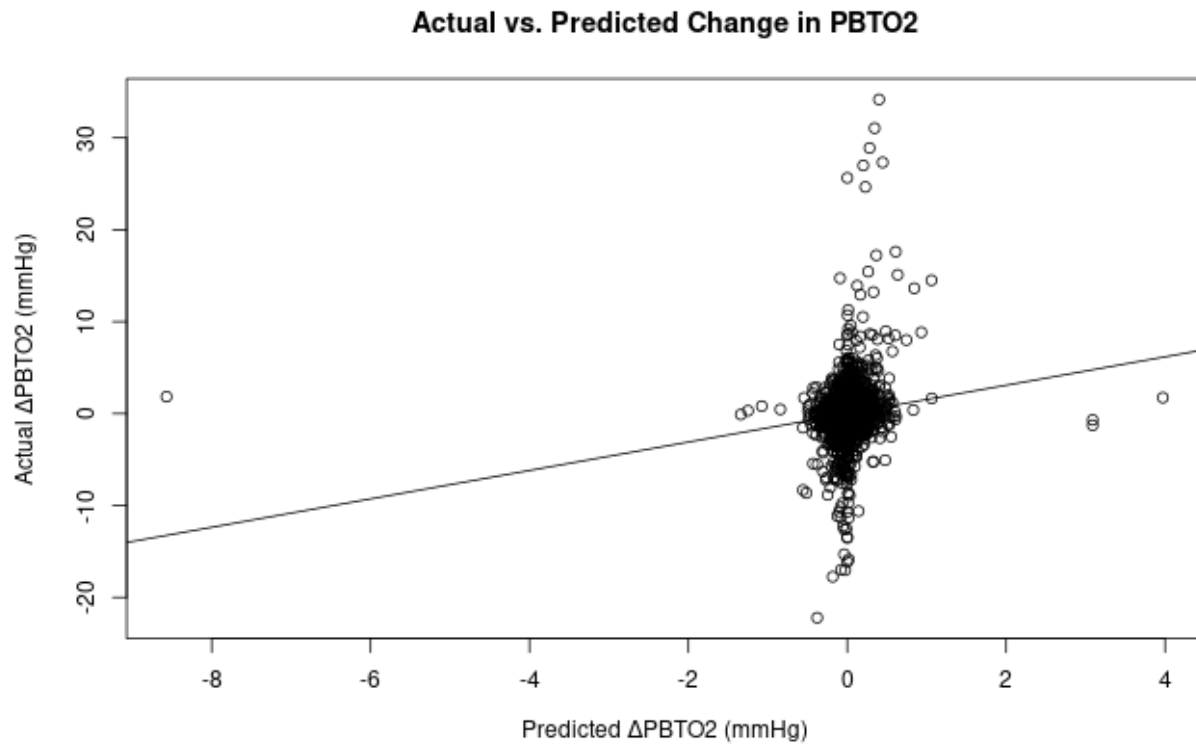

**Supplementary File S3 Figure 16: Scatter plot of actual of actual vs predicted values of  $\Delta$ PbtO2 for Subject 16.**

**Subject 17****Actual vs. Predicted Change in PBT02**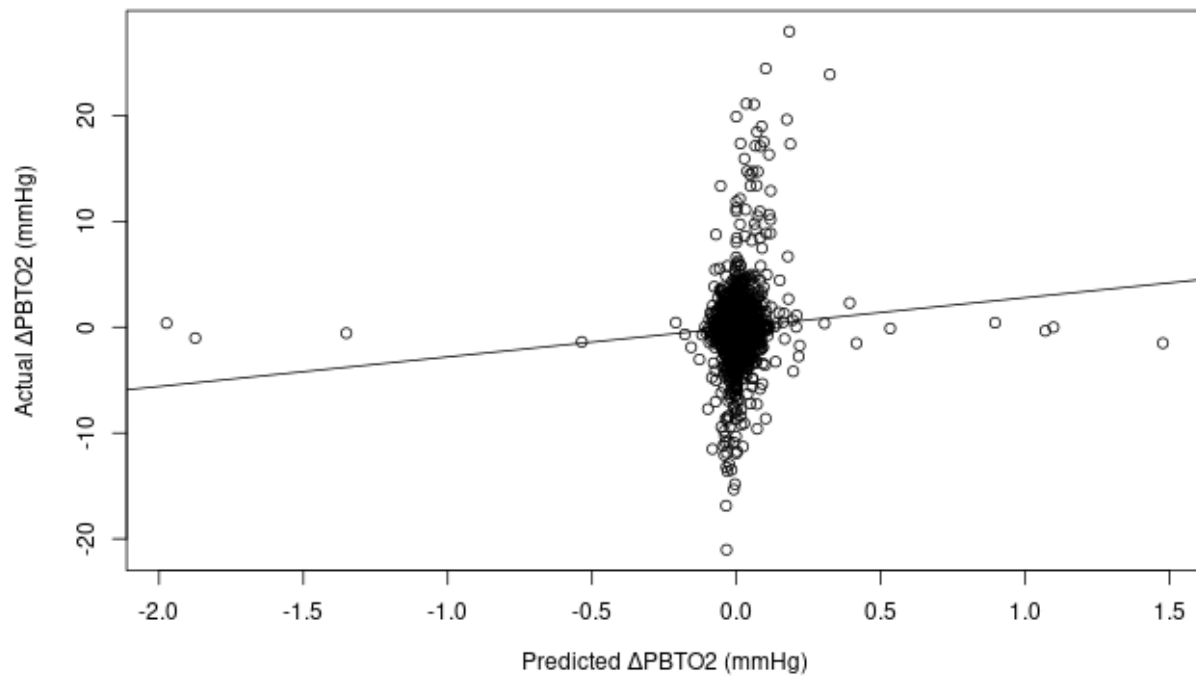

**Supplementary File S3 Figure 17: Scatter plot of actual of actual vs predicted values of  $\Delta$ PbtO2 for Subject 17.**



## Subject 18

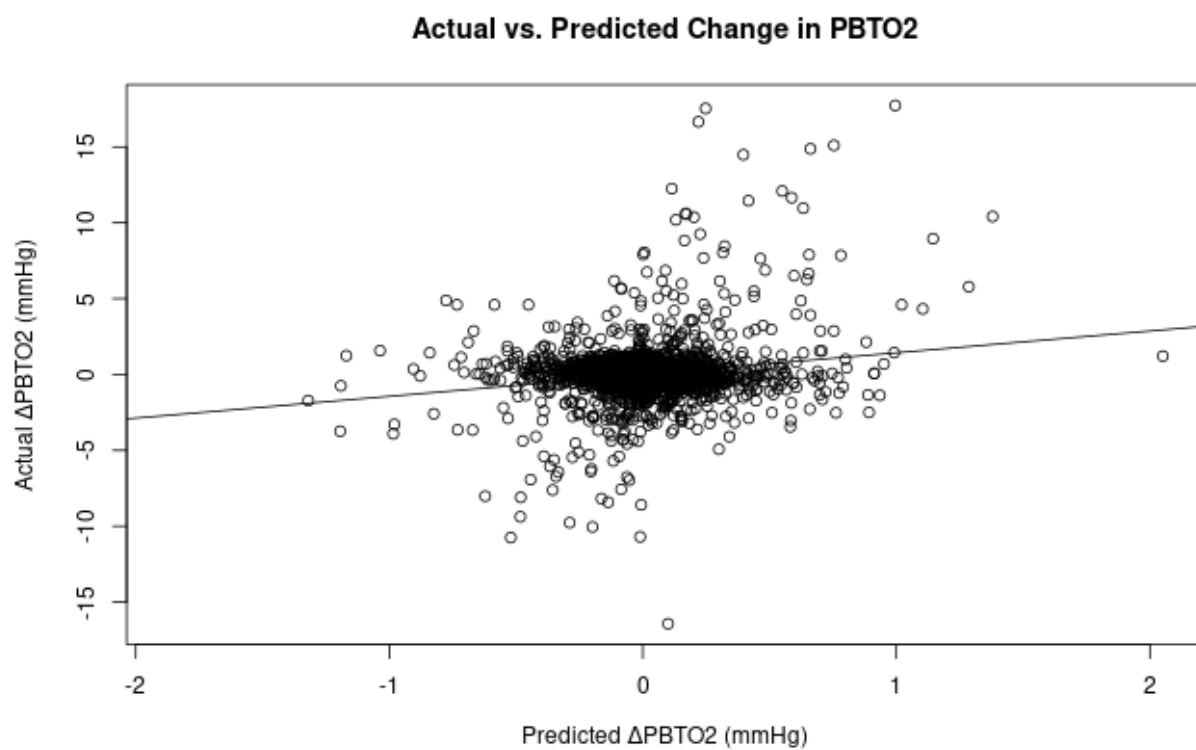

**Supplementary File S3 Figure 18: Scatter plot of actual of actual vs predicted values of  $\Delta$ PbtO2 for Subject 18.**

**Subject 19**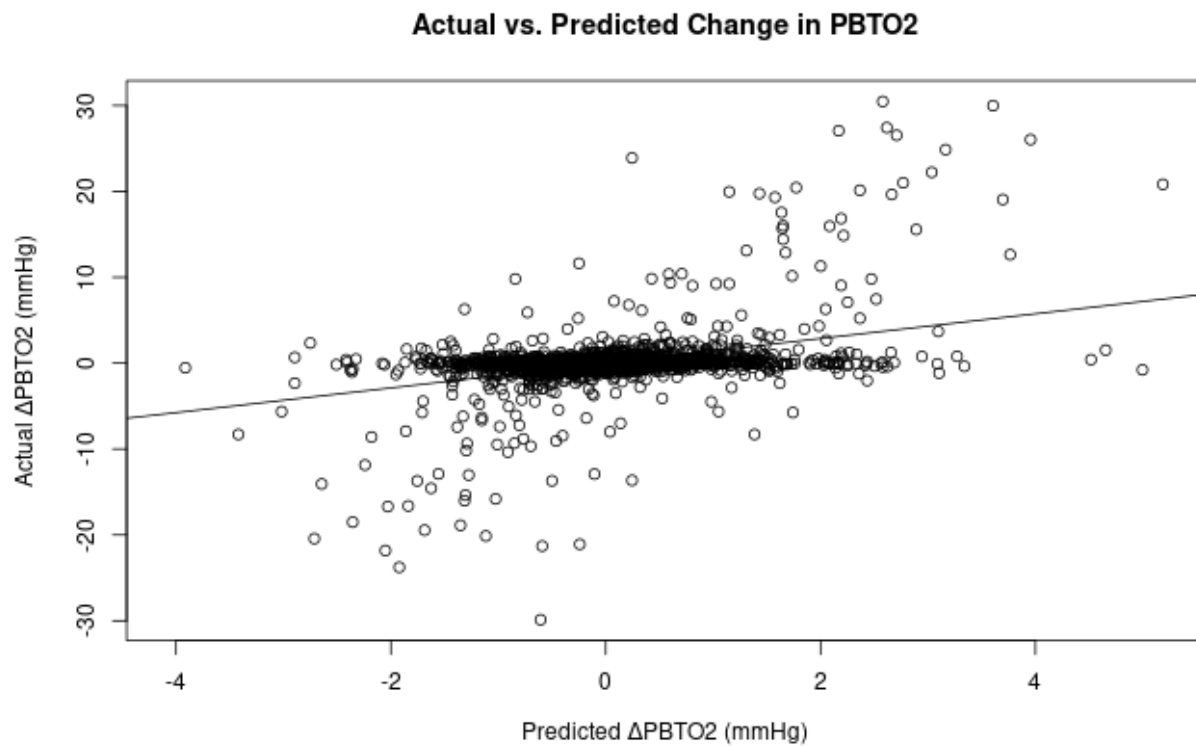

**Supplementary File S3 Figure 19: Scatter plot of actual of actual vs predicted values of  $\Delta$ PbtO2 for Subject 19.**

## Subject 20

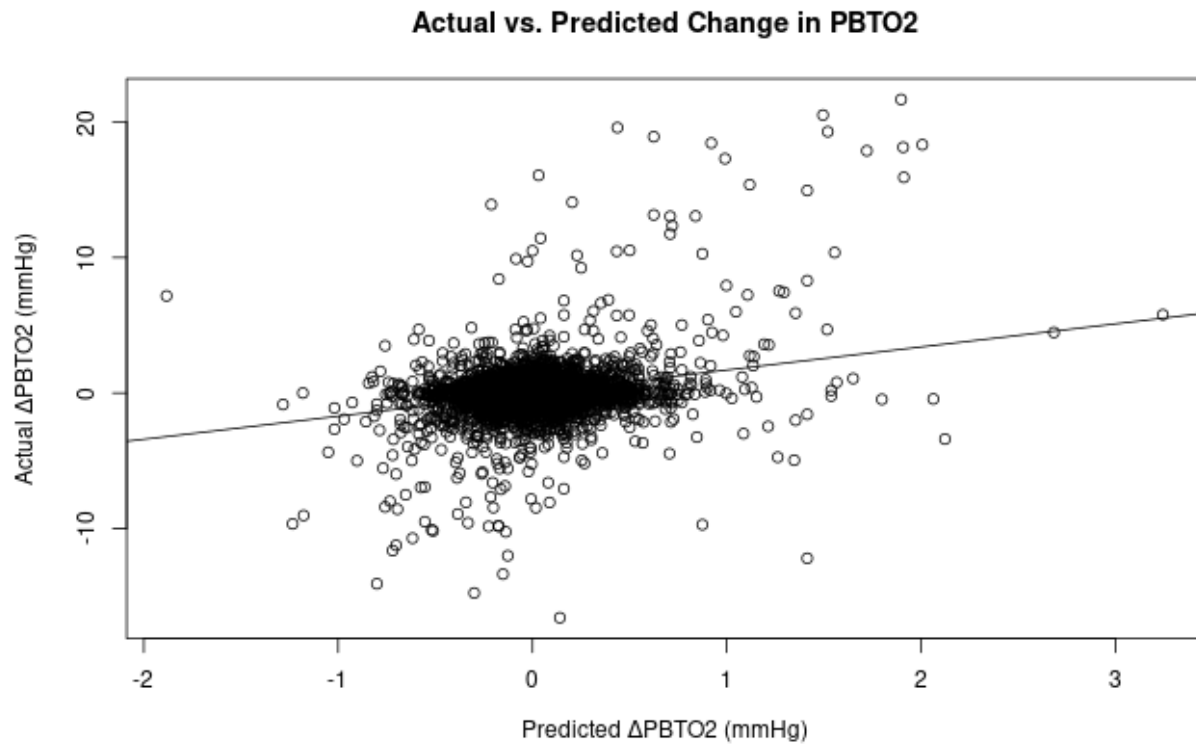

**Supplementary File S3 Figure 20: Scatter plot of actual of actual vs predicted values of  $\Delta$ PbtO2 for Subject 20.**

4 **Supplementary File S4: Bland-Altman plots to evaluate model agreement**

**Plot Legend:**  $\Delta PbtO_2$  = *change in brain tissue oxygen tension*.

## Subject 1

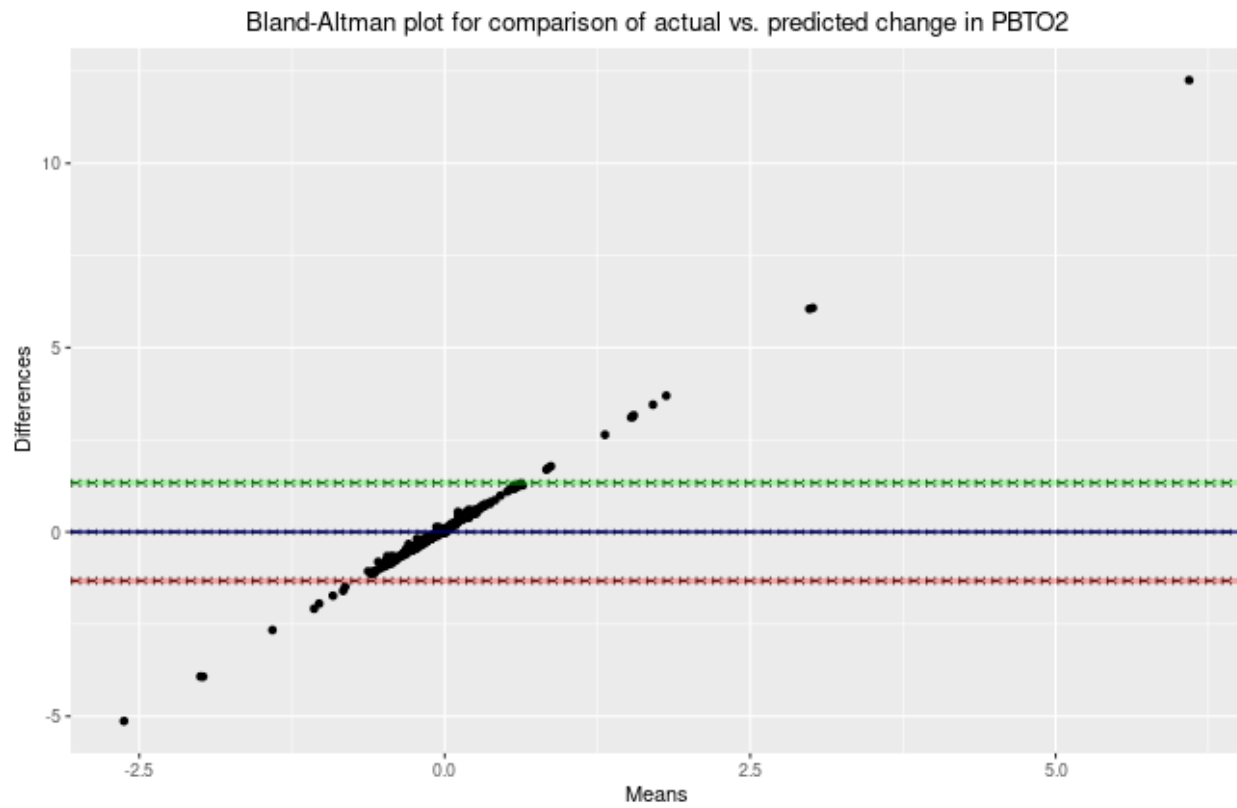

**Supplementary File S4 Figure 1: Bland-Altman Plot comparing agreement between predicted values of  $\Delta$ PbtO<sub>2</sub> and actual values of  $\Delta$ PbtO<sub>2</sub> for Subject 1**

## Subject 2

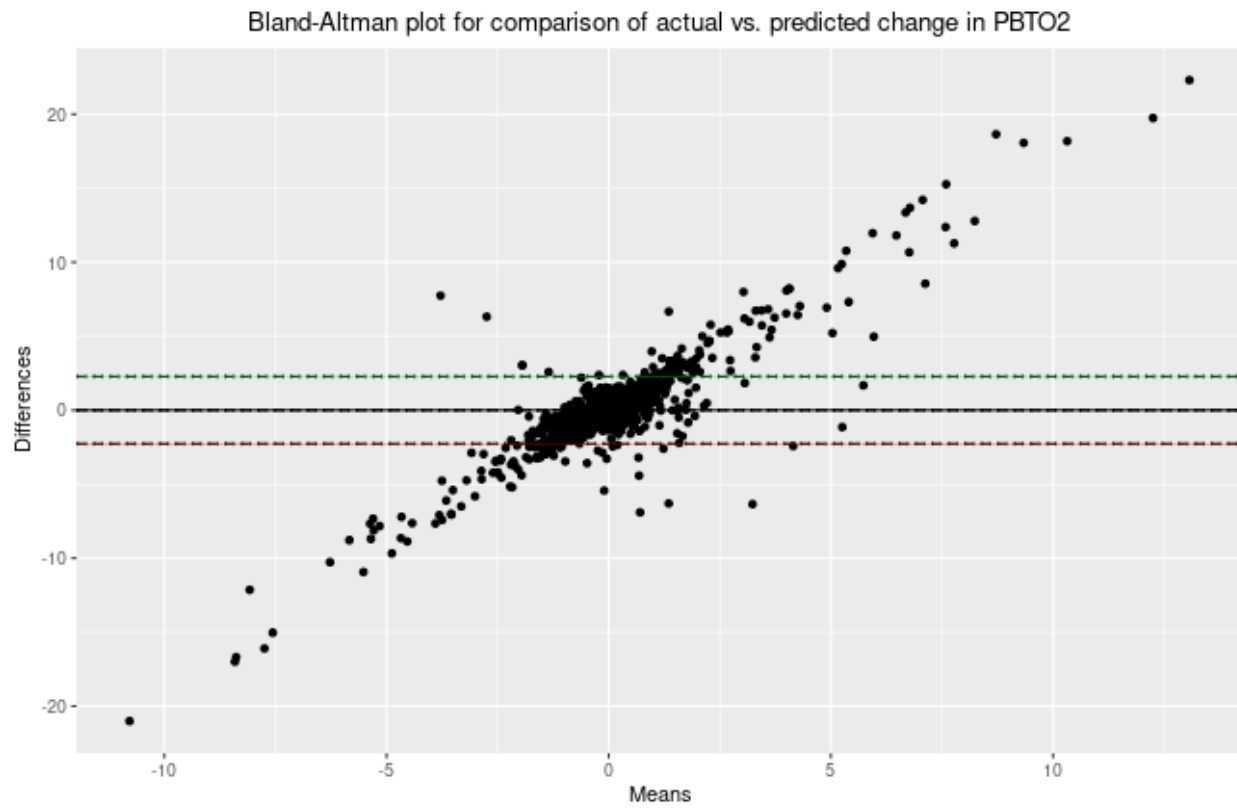

**Supplementary File S4 Figure 2: Bland-Altman Plot comparing agreement between predicted values of  $\Delta\text{PbtO}_2$  and actual values of  $\Delta\text{PbtO}_2$  for Subject 2**

### Subject 3

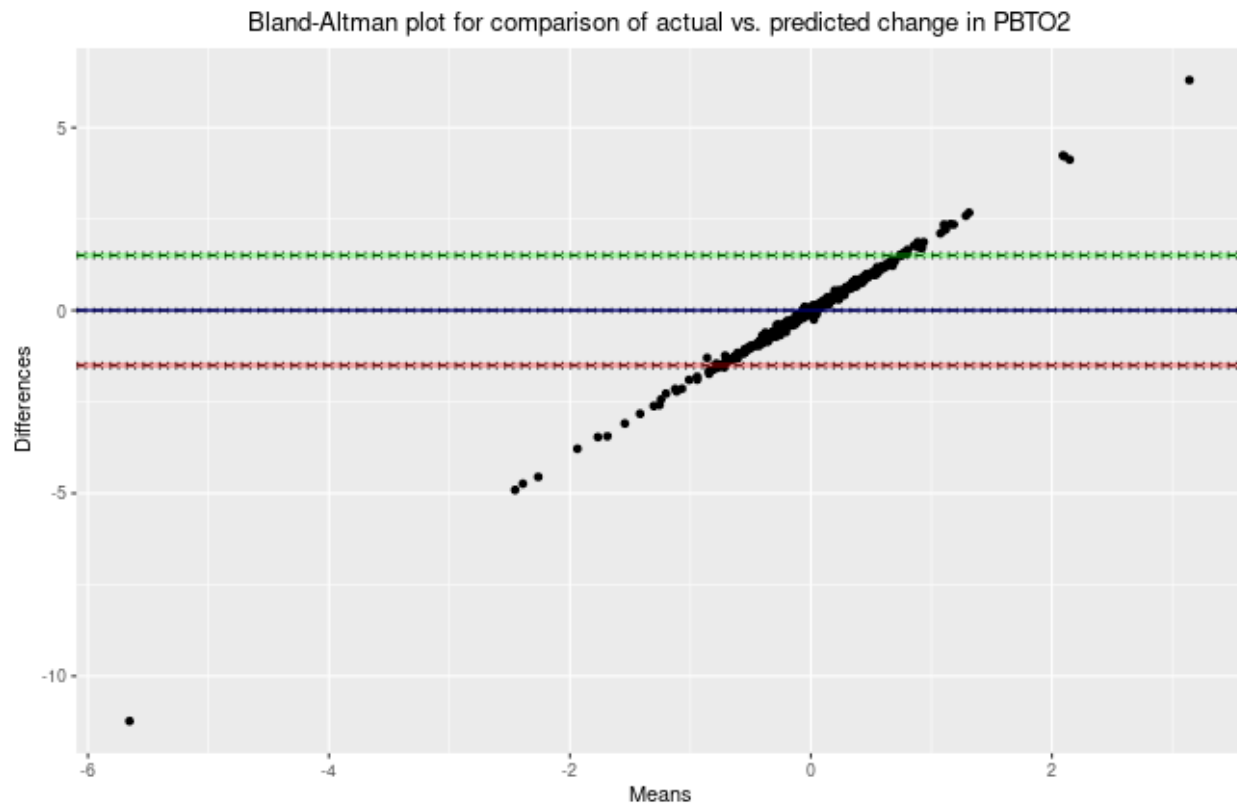

**Supplementary File S4 Figure 3: Bland-Altman Plot comparing agreement between predicted values of  $\Delta PbtO_2$  and actual values of  $\Delta PbtO_2$  for Subject 3**

## Subject 4

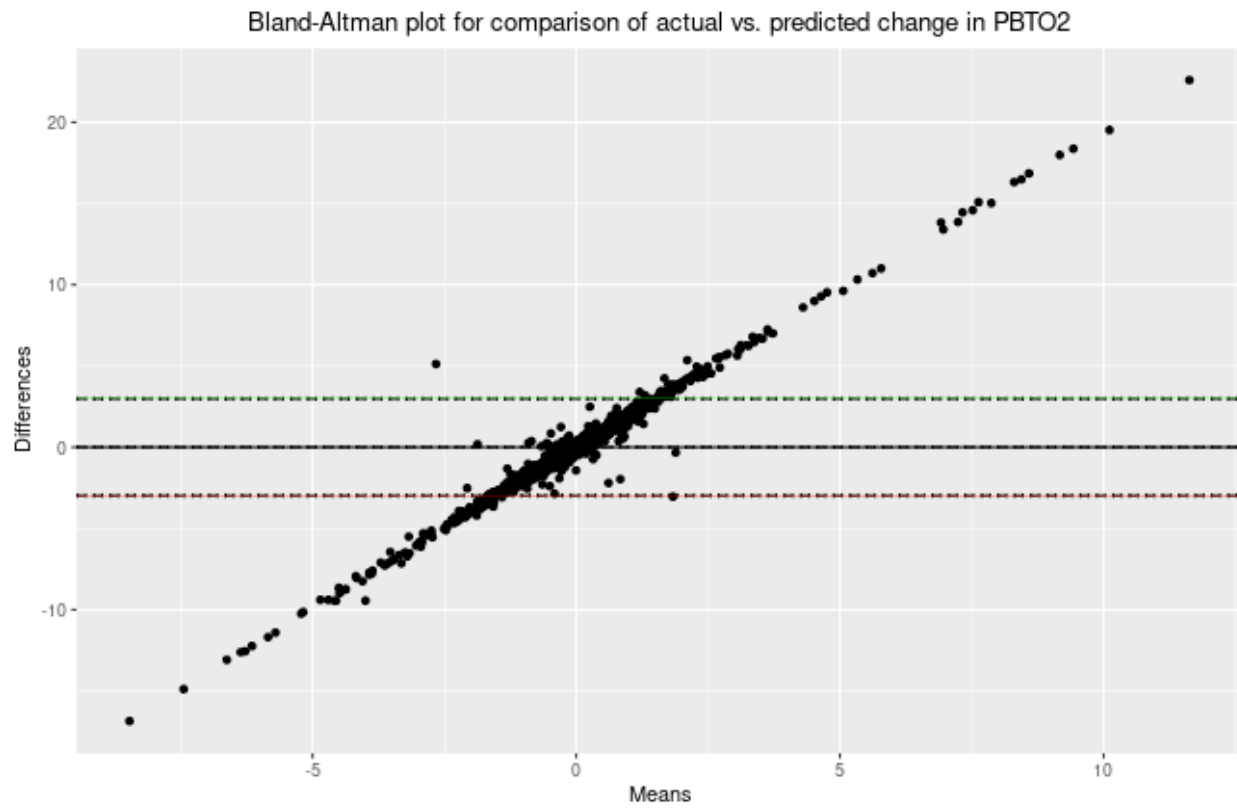

**Supplementary File S4 Figure 4: Bland-Altman Plot comparing agreement between predicted values of  $\Delta\text{PbtO}_2$  and actual values of  $\Delta\text{PbtO}_2$  for Subject 4**



## Subject 5

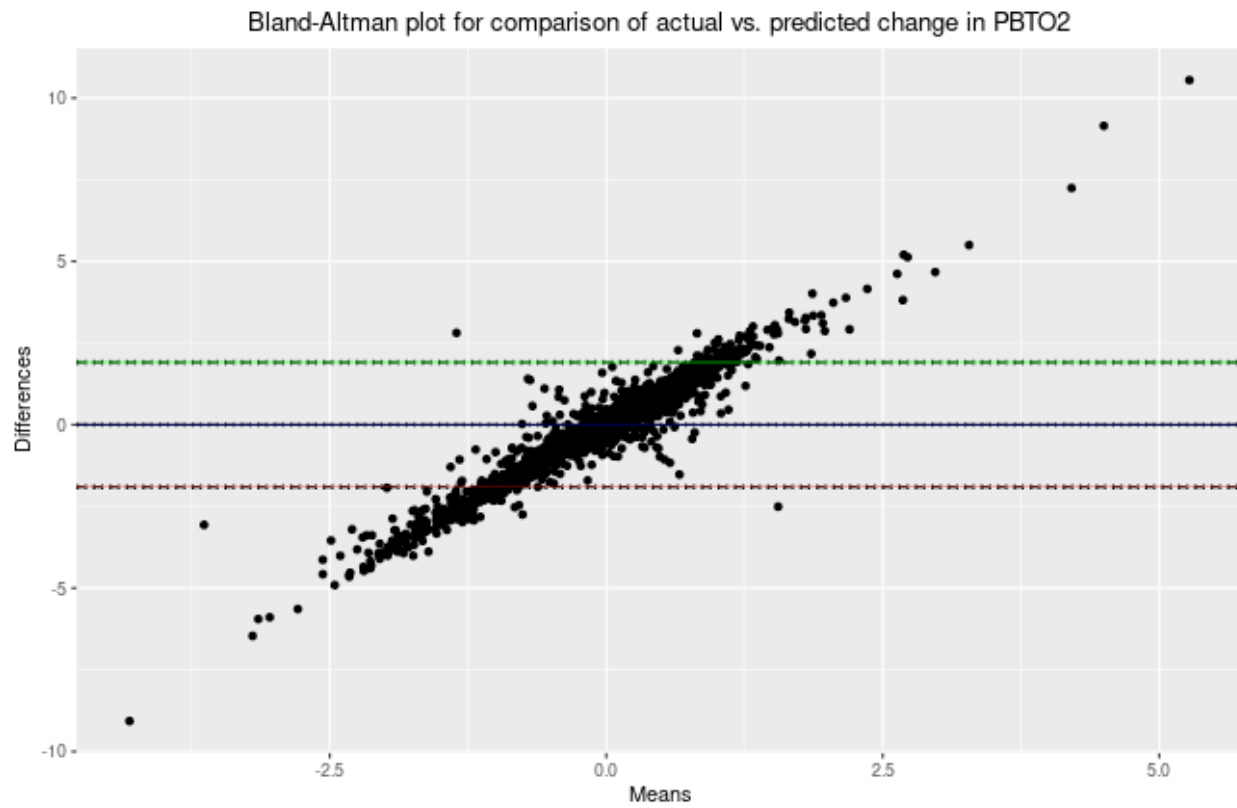

**Supplementary File S4 Figure 5: Bland-Altman Plot comparing agreement between predicted values of  $\Delta\text{PbtO}_2$  and actual values of  $\Delta\text{PbtO}_2$  for Subject 5**

## Subject 6

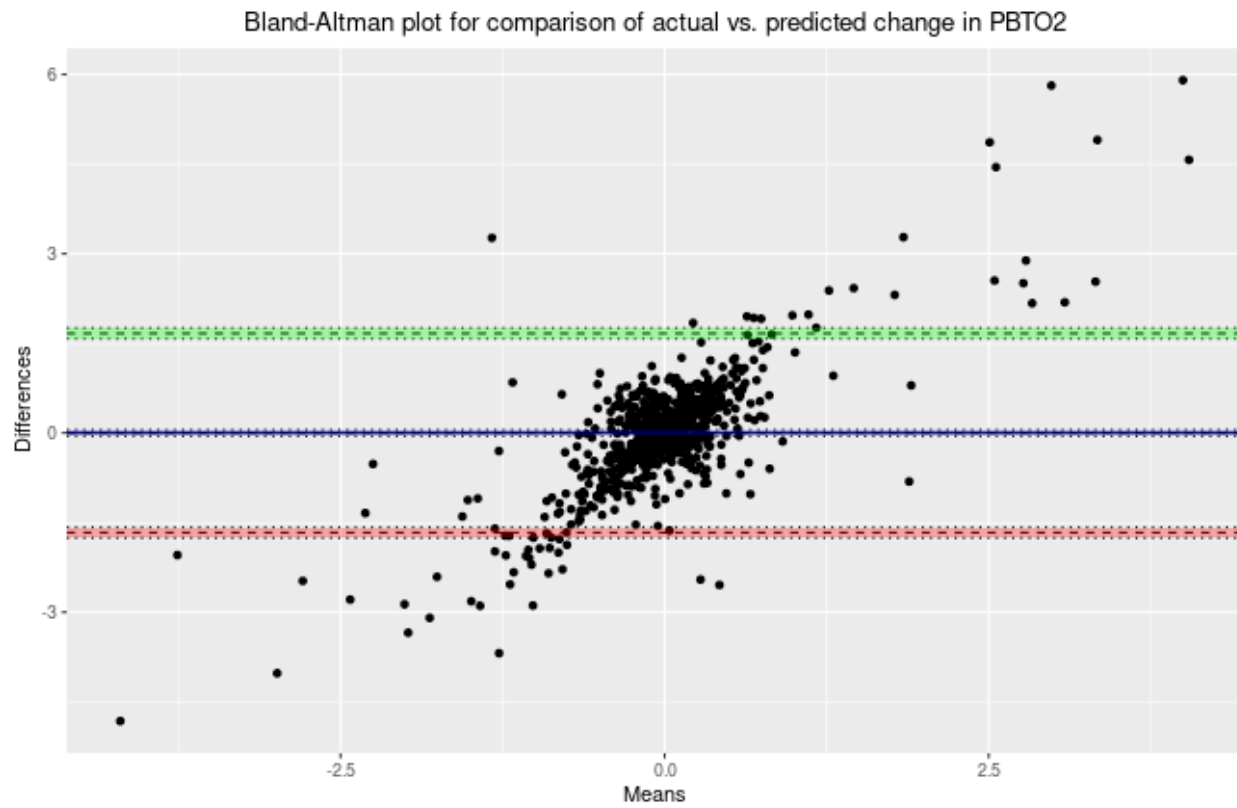

**Supplementary File S4 Figure 6: Bland-Altman Plot comparing agreement between predicted values of  $\Delta\text{PbtO}_2$  and actual values of  $\Delta\text{PbtO}_2$  for Subject 6**

## Subject 7

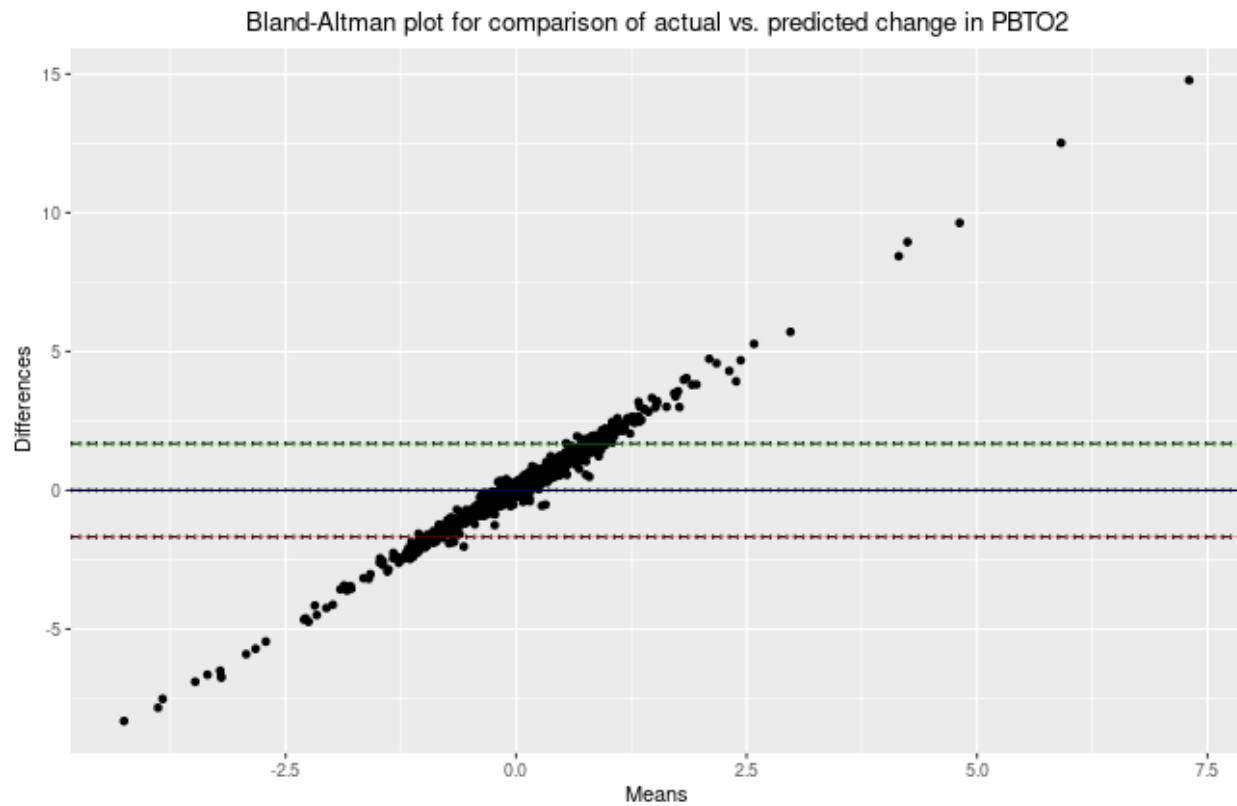

**Supplementary File S4 Figure 7: Bland-Altman Plot comparing agreement between predicted values of  $\Delta$ PbtO<sub>2</sub> and actual values of  $\Delta$ PbtO<sub>2</sub> for Subject 7**

## Subject 8

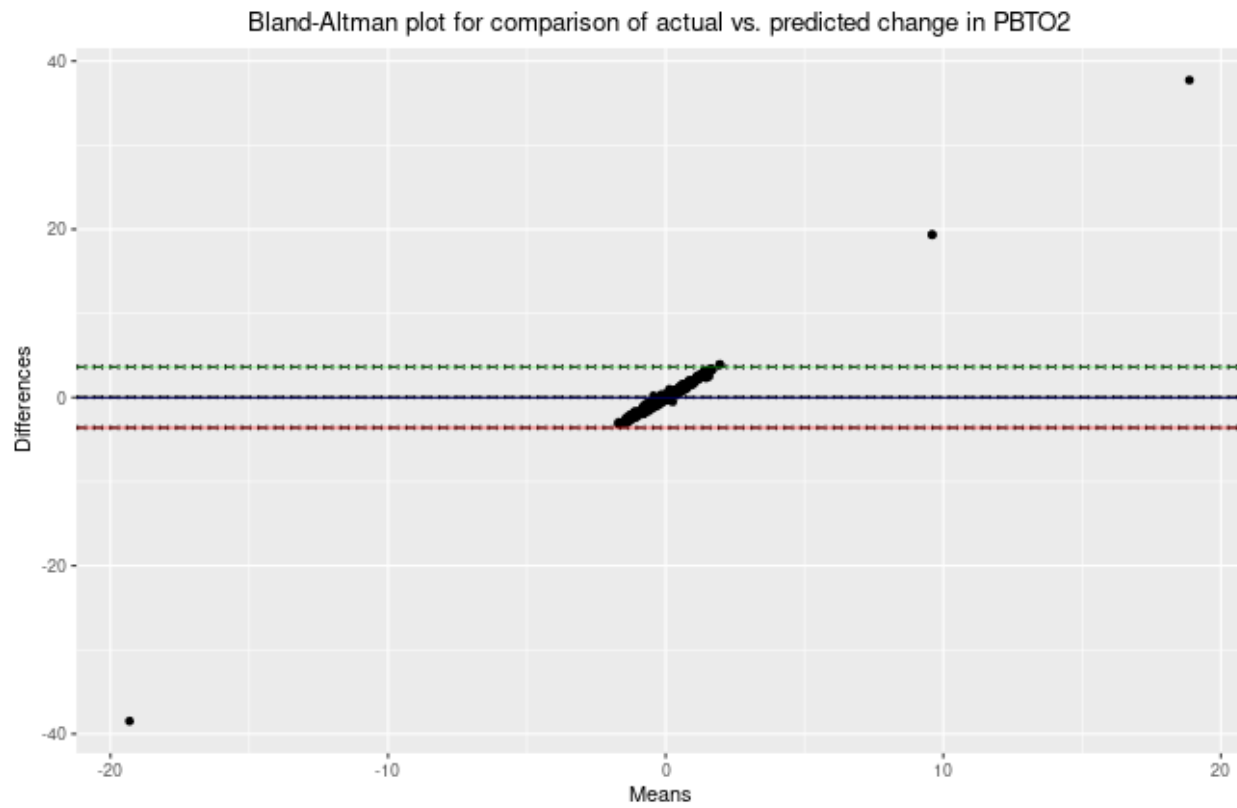

**Supplementary File S4 Figure 8: Bland-Altman Plot comparing agreement between predicted values of  $\Delta\text{PbtO}_2$  and actual values of  $\Delta\text{PbtO}_2$  for Subject 8**

## Subject 9

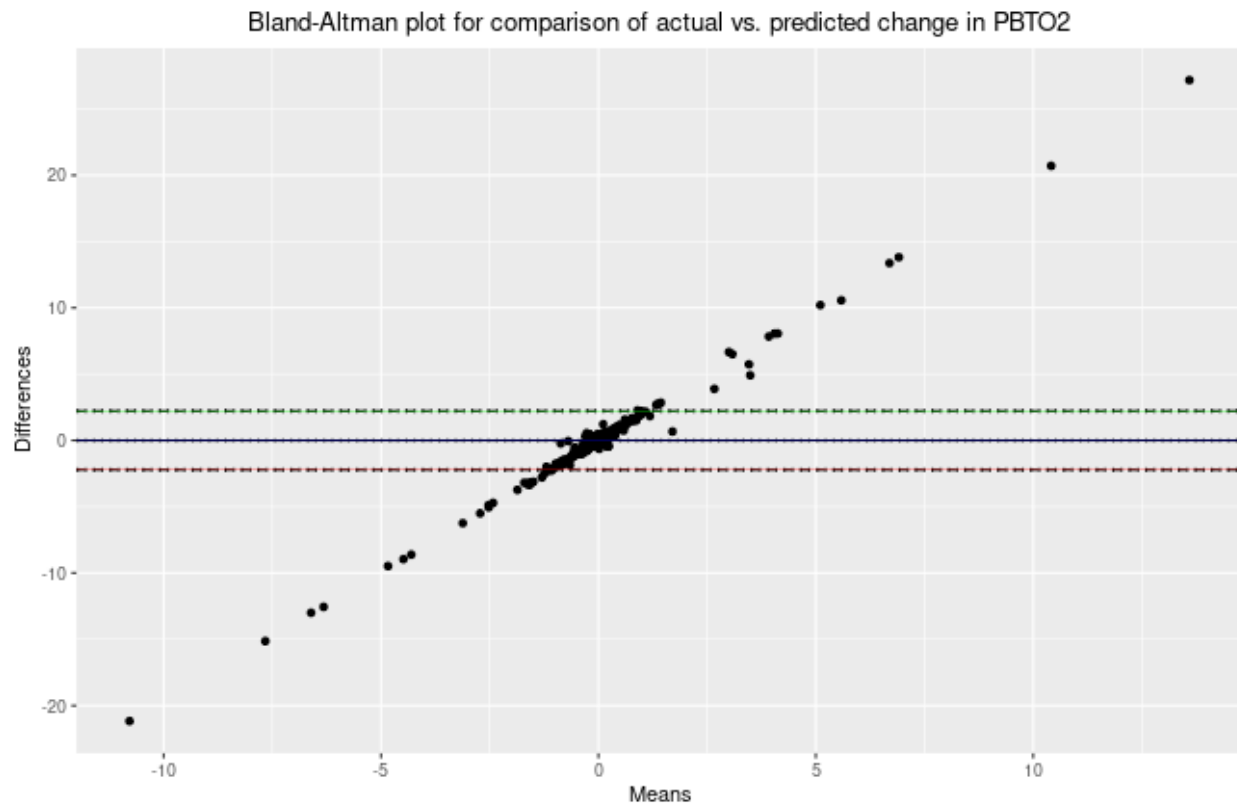

**Supplementary File S4 Figure 9: Bland-Altman Plot comparing agreement between predicted values of  $\Delta\text{PbtO}_2$  and actual values of  $\Delta\text{PbtO}_2$  for Subject 9**

**Subject 10**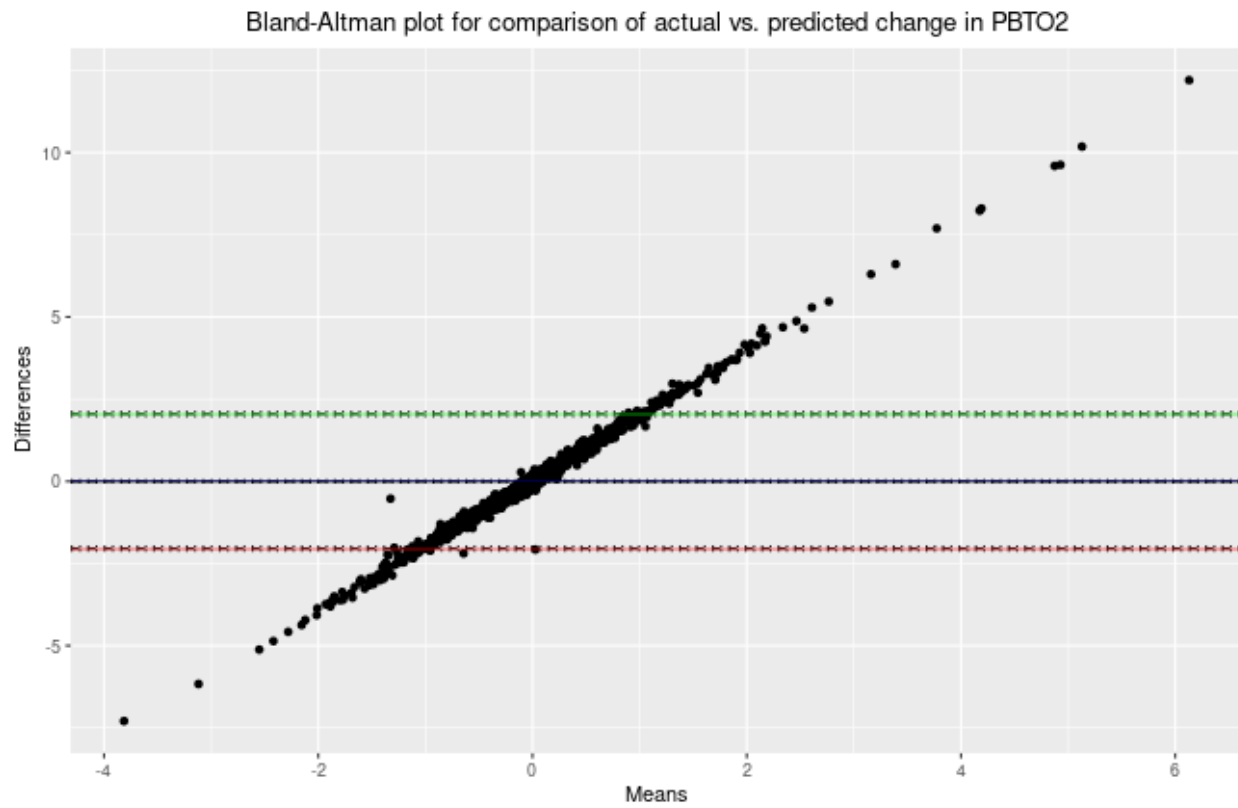

**Supplementary File S4 Figure 10: Bland-Altman Plot comparing agreement between predicted values of  $\Delta$ PbtO<sub>2</sub> and actual values of  $\Delta$ PbtO<sub>2</sub> for Subject 10**

## Subject 11

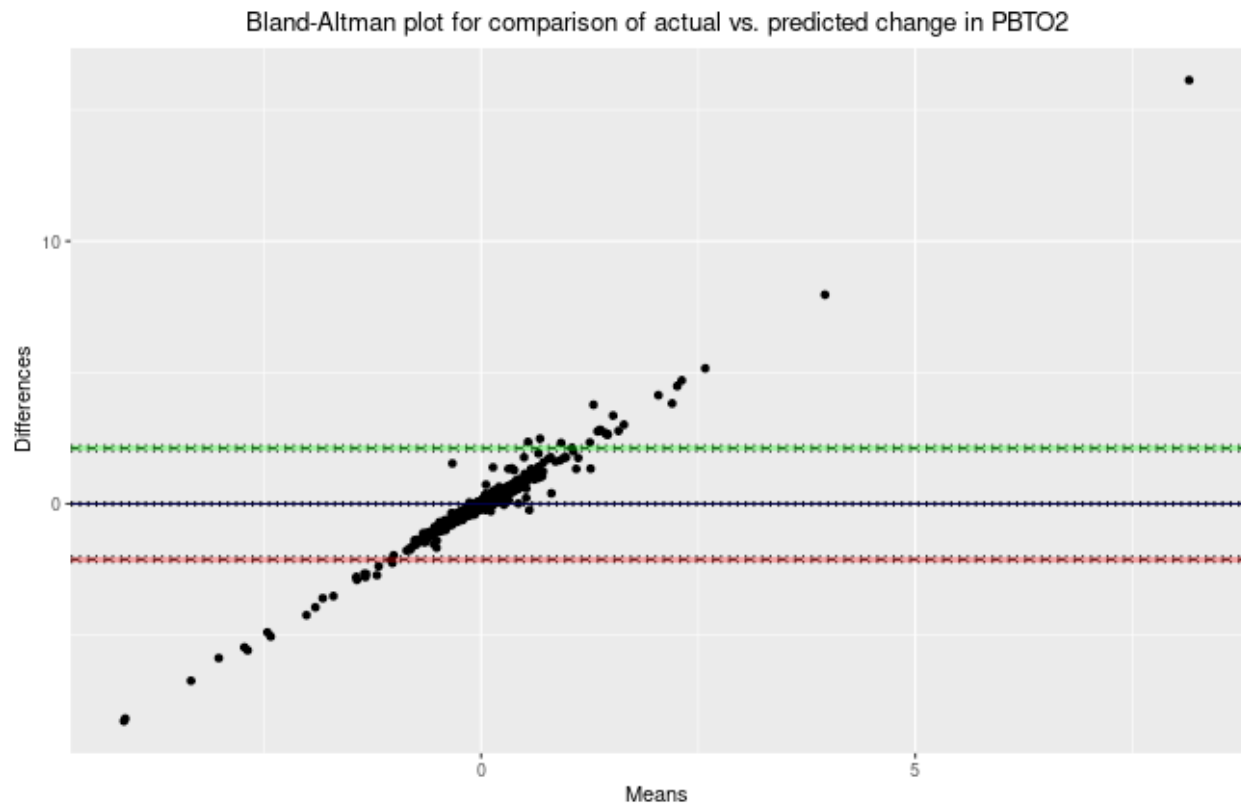

**Supplementary File S4 Figure 11: Bland-Altman Plot comparing agreement between predicted values of  $\Delta\text{PbtO}_2$  and actual values of  $\Delta\text{PbtO}_2$  for Subject 11**

## Subject 12

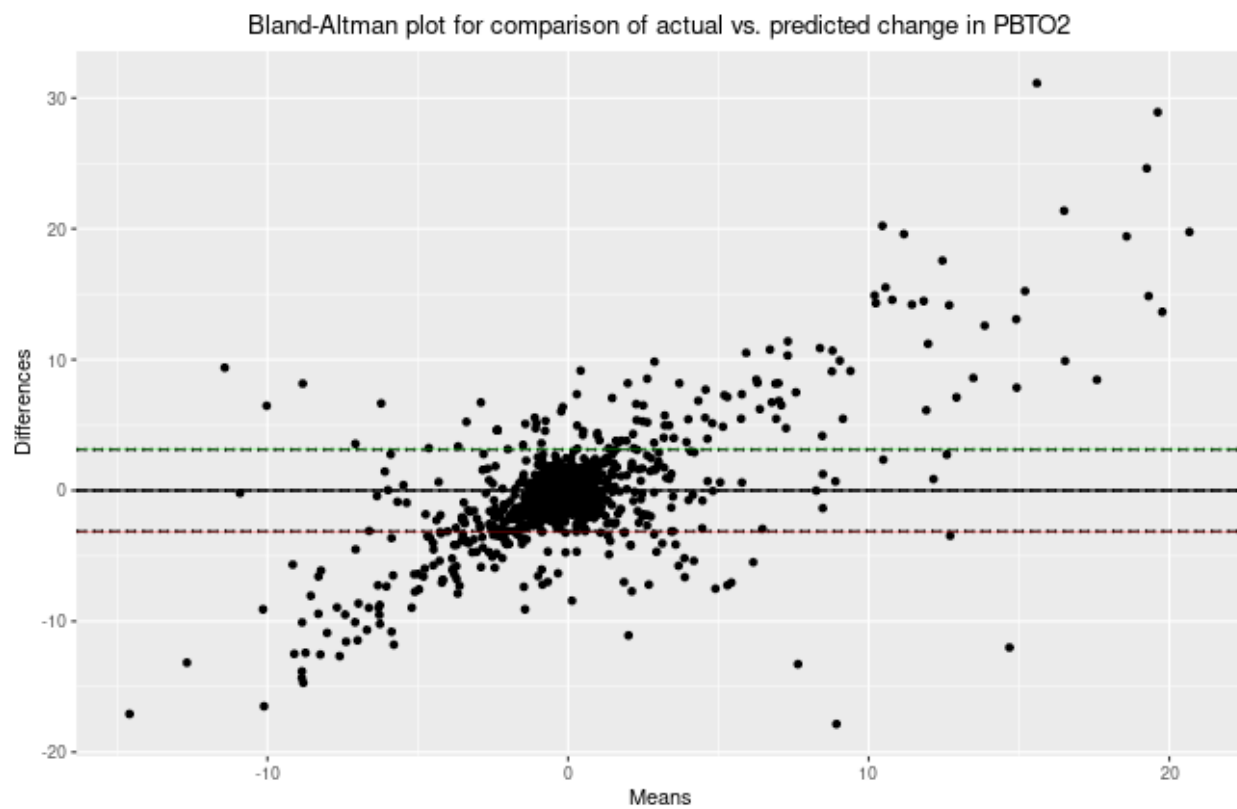

**Supplementary File S4 Figure 12: Bland-Altman Plot comparing agreement between predicted values of  $\Delta\text{PbtO}_2$  and actual values of  $\Delta\text{PbtO}_2$  for Subject 12**



### Subject 13

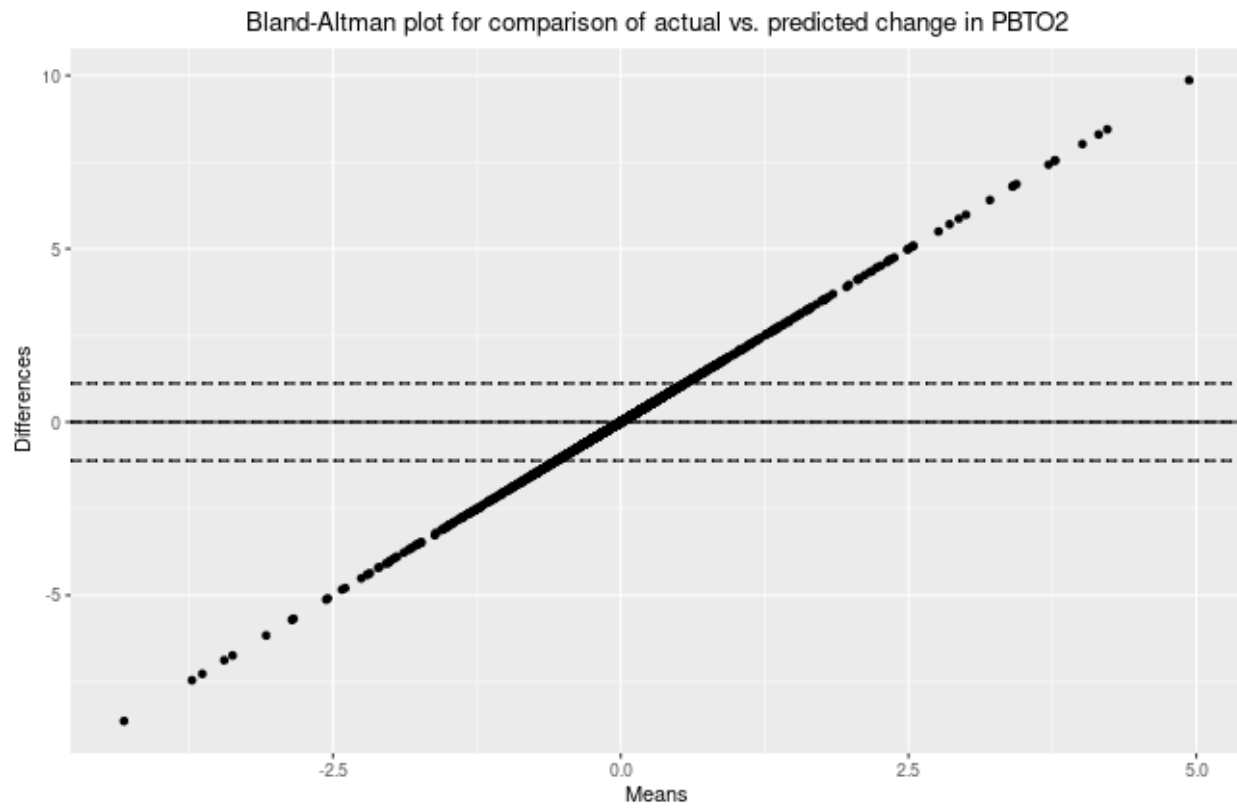

**Supplementary File S4 Figure 13: Bland-Altman Plot comparing agreement between predicted values of  $\Delta$ PbtO<sub>2</sub> and actual values of  $\Delta$ PbtO<sub>2</sub> for Subject 13**

## Subject 14

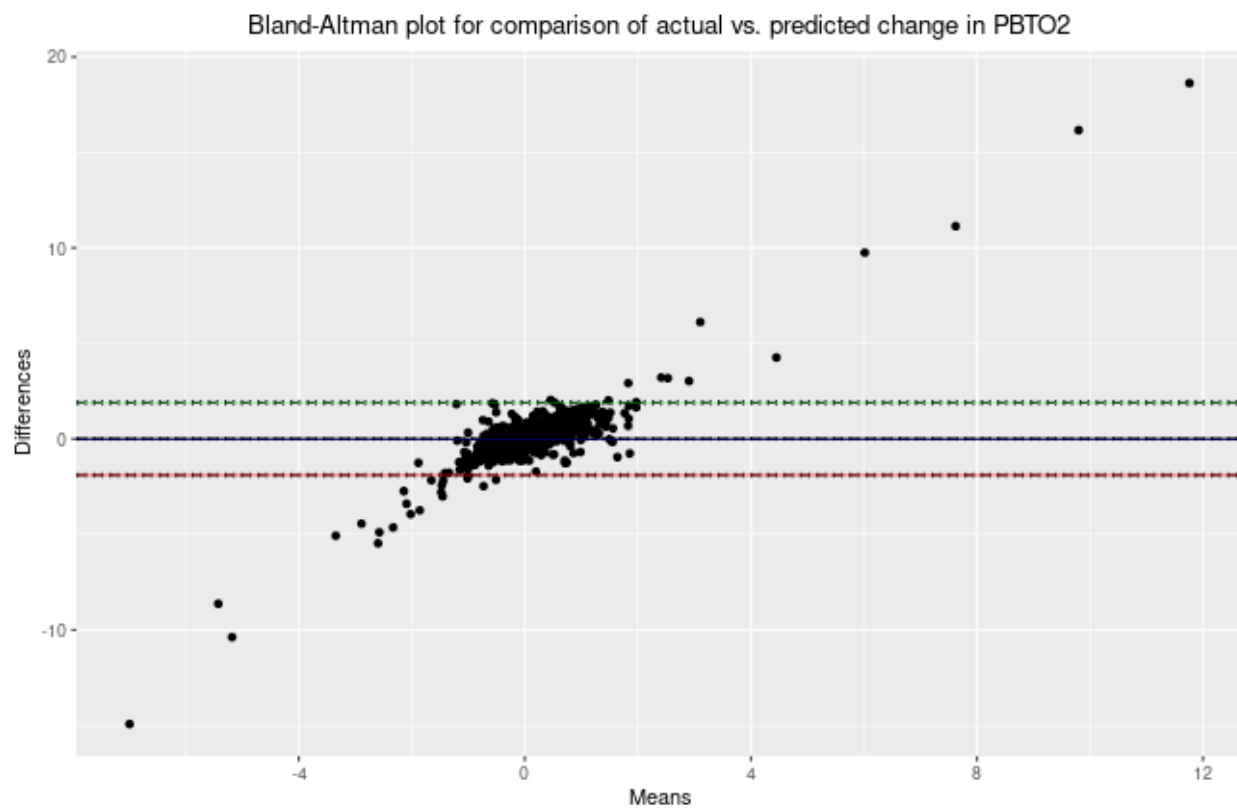

**Supplementary File S4 Figure 14: Bland-Altman Plot comparing agreement between predicted values of  $\Delta\text{PbtO}_2$  and actual values of  $\Delta\text{PbtO}_2$  for Subject 14**

## Subject 15

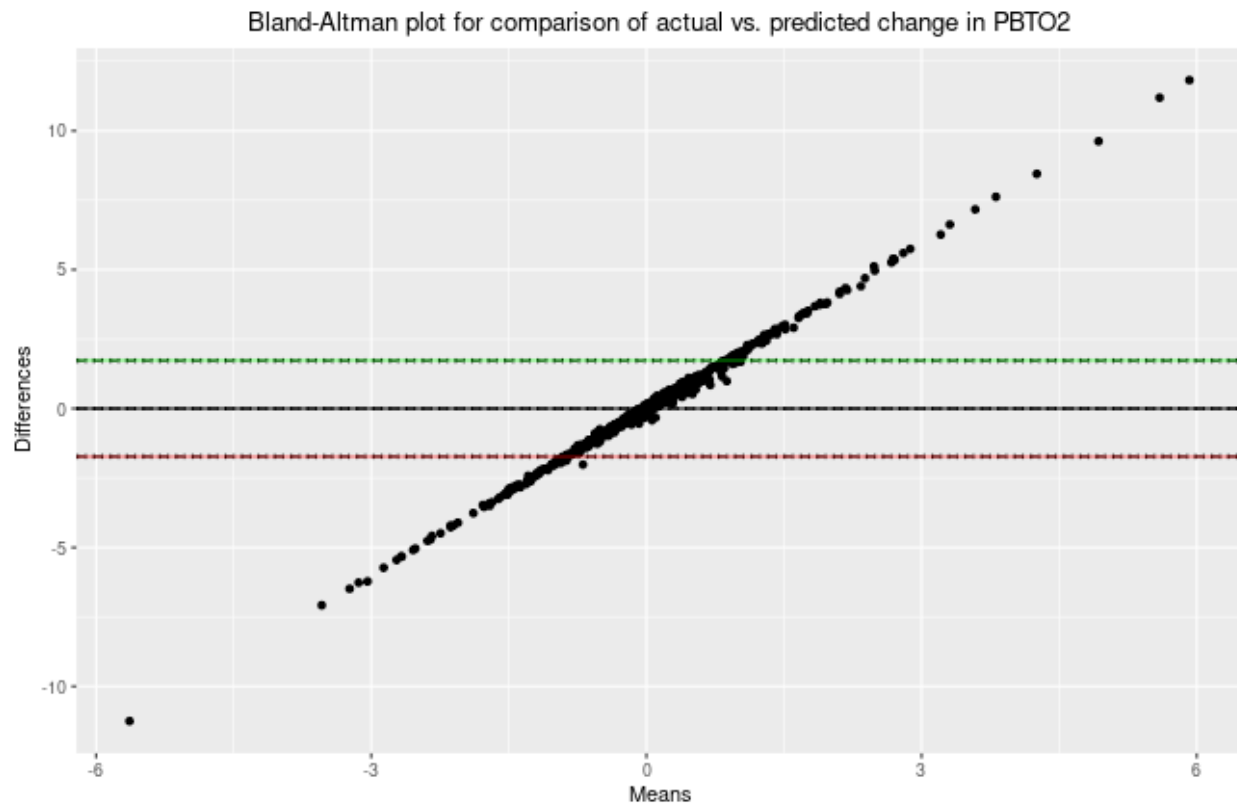

**Supplementary File S4 Figure 15: Bland-Altman Plot comparing agreement between predicted values of  $\Delta\text{PbtO}_2$  and actual values of  $\Delta\text{PbtO}_2$  for Subject 15**

**Subject 16**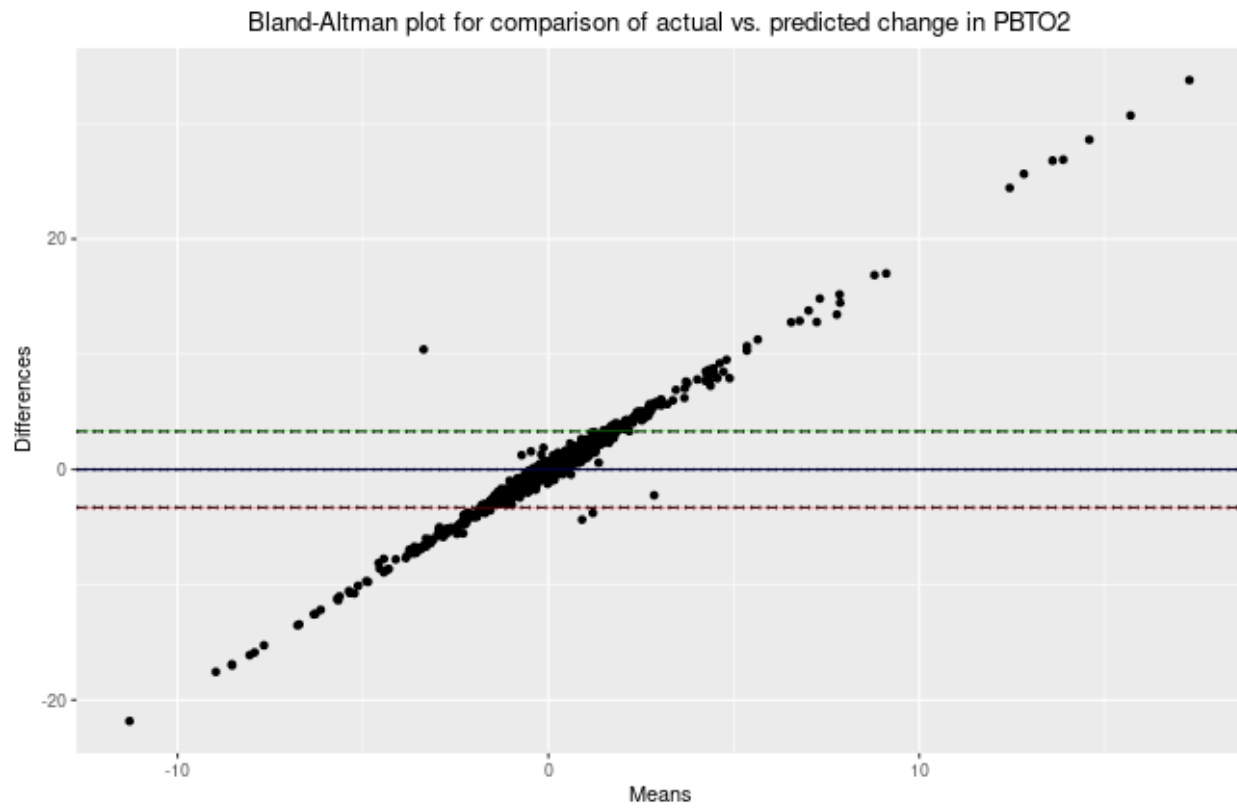

**Supplementary File S4 Figure 16: Bland-Altman Plot comparing agreement between predicted values of  $\Delta\text{PbtO}_2$  and actual values of  $\Delta\text{PbtO}_2$  for Subject 16**

## Subject 17

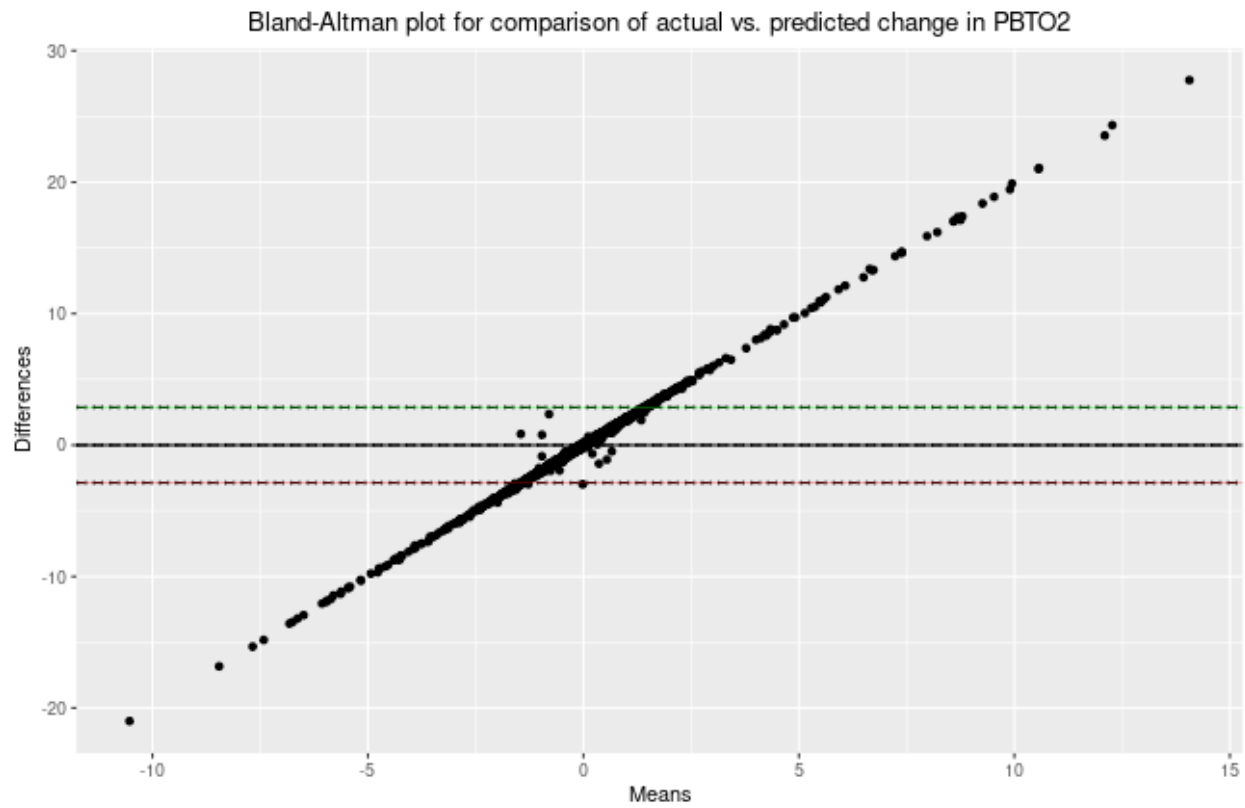

**Supplementary File S4 Figure 17: Bland-Altman Plot comparing agreement between predicted values of  $\Delta\text{PbtO}_2$  and actual values of  $\Delta\text{PbtO}_2$  for Subject 17**

## Subject 18

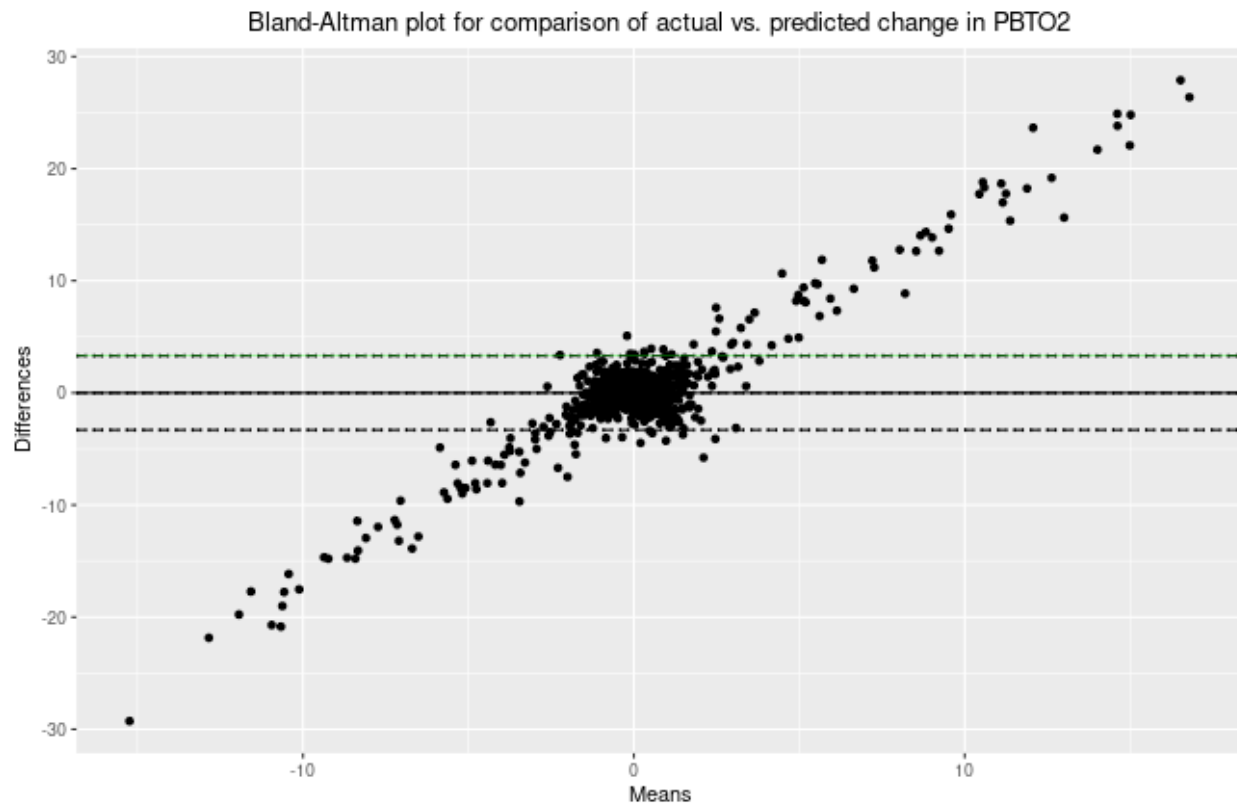

**Supplementary File S4 Figure 18: Bland-Altman Plot comparing agreement between predicted values of  $\Delta$ PbtO<sub>2</sub> and actual values of  $\Delta$ PbtO<sub>2</sub> for Subject 18**

## Subject 19



**Supplementary File S4 Figure 19: Bland-Altman Plot comparing agreement between predicted values of  $\Delta\text{PbtO}_2$  and actual values of  $\Delta\text{PbtO}_2$  for Subject 19**

**Subject 20**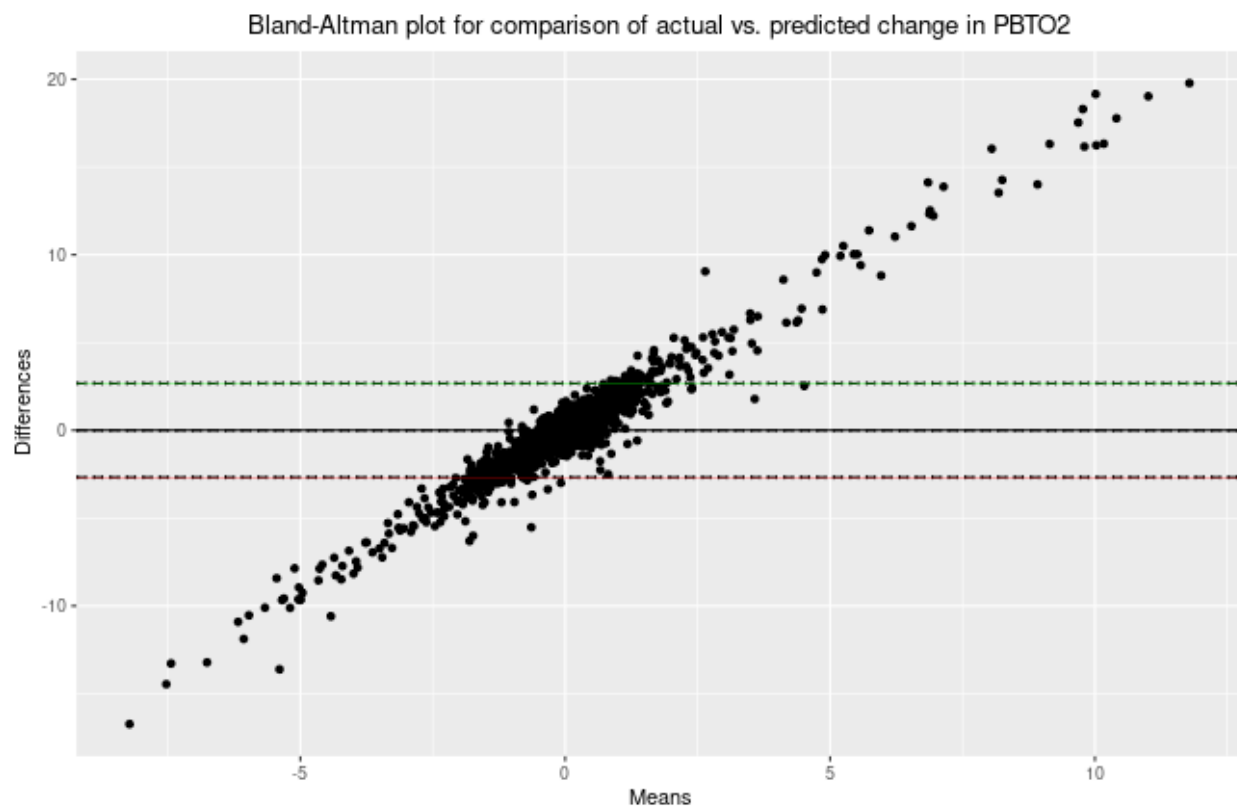

**Supplementary File S4 Figure 20: Bland-Altman Plot comparing agreement between predicted values of  $\Delta\text{PbtO}_2$  and actual values of  $\Delta\text{PbtO}_2$  for Subject 20**
